# Supplementary material for: Exploration of the Potential Mechanisms of Lingqihuangban Granule for Treating Diabetic Retinopathy Based on Network Pharmacology
Source: Research Square preprint supplement (doi:10.21203/rs.3.rs-90763/v1), 2020-10-16
Supplement: Supplementary file 1 [file c953425b828b37a056ed6c2e.xlsx]

## Sheet: Table S1
Table S1 The active compounds screened from Lingqihuangban Granule by TCMSP database
Herb	MOL ID	Molecule Name	OB(%)≧30	DL≧0.18
Cistanche	MOL000358	beta-sitosterol	36.91	0.75
	MOL005320	arachidonate	45.57	0.2
	MOL005384	suchilactone	57.52	0.56
	MOL007563	Yangambin	57.53	0.81
	MOL000098	quercetin	46.43	0.28
	MOL008871	Marckine	37.05	0.69
Lucid ganoderma	MOL011125	(+)-Ganoderic acid Mf	32.62	0.82
	MOL011127	(+)-Methyl ganolucidate A	31.14	0.82
	MOL011129	methyl (4R)-4-[(5R,10S,13R,14R,17R)-4,4,10,13,14-pentamethyl-3,7,11,15-tetraoxo-2,5,6,12,16,17-hexahydro-1H-cyclopenta[a]phenanthren-17-yl]pentanoate/Methyl lucidenate F	32.67	0.81
	MOL011135	22,23-dimethylene ganodermic acid S	33.61	0.71
	MOL011136	22β-acetoxy-3α,15α-dihydroxylanosta-7,9(11),24-trien-26-oic acid	37.64	0.8
	MOL011137	campesta-7,22E-dien-3beta-ol/Stellasterol	43.51	0.72
	MOL011140	5alpha-Lanosta-7,9(11),24-triene-15alpha,26-dihydroxy-3-one	38.54	0.81
	MOL011156	epoxyganoderiol A	33.78	0.83
	MOL011157	epoxyganoderiol B	42.3	0.83
	MOL011158	epoxyganoderiol C	37.7	0.83
	MOL011159	ergosta-4,6,8(14),22-tetraene-3-one	48.32	0.75
	MOL011160	ergosta-4,7,22-trien-3,6-dione	47.86	0.77
	MOL011162	Ergosta-7,22-dien-3beta-yl palmitate	37.6	0.43
	MOL011164	ergosta-7,22-dien-3β,5α,6α-triol	31.43	0.77
	MOL011165	ergosta-7,22-diene-3beta-yl linoleate	45.11	0.37
	MOL011166	ergosta-7,22-diene-3beta-yl palmitate	37.6	0.43
	MOL011167	ergosta-7,22-diene-3beta-yl pentadecanoate	38.25	0.47
	MOL011168	ergosta-7,9(11),22-trien-3β,5α,6α-triol	46.95	0.78
	MOL011169	Peroxyergosterol	44.39	0.82
	MOL011171	ganoderal B	42.56	0.81
	MOL011172	ganoderan B	42.19	0.81
	MOL011183	Ganoderic acid beta	30.54	0.82
	MOL011189	Ganoderic acid DM	38.8	0.83
	MOL011206	(E,6R)-6-[(3R,5R,10S,13R,14R,15S,17R)-3,15-diacetoxy-4,4,10,13,14-pentamethyl-2,3,5,6,12,15,16,17-octahydro-1H-cyclopenta[a]phenanthren-17-yl]-2-methylhept-2-enoic acid	31.16	0.76
	MOL011209	ganoderic acid Mi	34.4	0.81
	MOL011214	(E,5S,6S)-5-acetoxy-6-[(3R,5R,10S,13R,14R,17R)-3-acetoxy-4,4,10,13,14-pentamethyl-2,3,5,6,12,15,16,17-octahydro-1H-cyclopenta[a]phenanthren-17-yl]-2-methylhept-2-enoic acid	31.46	0.77
	MOL011215	(E,5S,6S)-5-acetoxy-6-[(3R,5R,10S,13R,14R,17R)-3-hydroxy-4,4,10,13,14-pentamethyl-2,3,5,6,12,15,16,17-octahydro-1H-cyclopenta[a]phenanthren-17-yl]-2-methylhept-2-enoic acid	34.37	0.83
	MOL011218	ganoderic acid TQ	36.3	0.78
	MOL011219	Ganoderic acid TR	36.23	0.83
	MOL011221	ganoderic acid V	30.19	0.8
	MOL011222	Ganoderic acid V1	30.18	0.8
	MOL011224	Ganoderic acid X	33.55	0.81
	MOL011225	Ganoderic acid Y	38.64	0.82
	MOL011226	ganoderic acid Z	37.67	0.82
	MOL011229	Ganoderic aldehyde A	42.26	0.81
	MOL011235	Ganoderiol F	38.12	0.82
	MOL011241	Ganodermanondiol	37.64	0.8
	MOL011243	ganodermatriol	30.46	0.82
	MOL011244	ganodermenonol	44.69	0.8
	MOL011245	Ganodermic acid R	31.16	0.76
	MOL011247	ganodermic acid T- Q	33.55	0.81
	MOL011248	ganodermic acid T- O	32.62	0.82
	MOL011250	Ganodermnonol	44.69	0.8
	MOL011251	Ganoderol A	44.69	0.8
	MOL011256	ganolucidic acid E	32.85	0.82
	MOL011258	ganosporelactone B	31.21	0.33
	MOL011262	lanosta-7,9(11),24-trien-15α-acetoxy-3α-hydroxy-23-oxo-26-oic acid	31.86	0.8
	MOL011264	lanosta-7,9(11),24-trien-3α-acetoxy-15α-hydroxy-23-oxo-26-oic acid	30.81	0.81
	MOL011265	lanosta-7,9(11),24-trien-3α-acetoxy-26-oic acid	38.85	0.84
	MOL011266	Lucialdehyde A	44.78	0.8
	MOL011267	Lucialdehyde B	43.12	0.81
	MOL011268	Lucialdehyde C	42.26	0.81
	MOL011270	(4R)-4-[(5R,7S,10S,13R,14R,17R)-7-hydroxy-3,11,15-triketo-4,4,10,13,14-pentamethyl-1,2,5,6,7,12,16,17-octahydrocyclopenta[a]phenanthren-17-yl]valeric acid	30.34	0.79
	MOL011287	lucidone A	37.22	0.64
	MOL011290	Lucidumol A	34.75	0.8
	MOL011303	methyl Ganoderic acid DM	39.55	0.83
	MOL011304	methyl Ganoderic acid TR	39.82	0.83
	MOL011309	Methyl lucidenate Q	30.19	0.81
	MOL000279	Cerevisterol	37.96	0.77
	MOL000282	ergosta-7,22E-dien-3beta-ol	43.51	0.72
	MOL000358	beta-sitosterol	36.91	0.75
Lycium barbarum	MOL001323	Sitosterol alpha1	43.28	0.78
	MOL003578	Cycloartenol	38.69	0.78
	MOL001494	Mandenol	42	0.19
	MOL001495	Ethyl linolenate	46.1	0.2
	MOL001979	LAN	42.12	0.75
	MOL000449	Stigmasterol	43.83	0.76
	MOL000358	beta-sitosterol	36.91	0.75
	MOL005406	atropine	45.97	0.19
	MOL005438	campesterol	37.58	0.71
	MOL006209	cyanin	47.42	0.76
	MOL007449	24-methylidenelophenol	44.19	0.75
	MOL008173	daucosterol_qt	36.91	0.75
	MOL008400	glycitein	50.48	0.24
	MOL010234	delta-Carotene	31.8	0.55
	MOL000953	CLR	37.87	0.68
	MOL009604	14b-pregnane	34.78	0.34
	MOL009612	(24R)-4alpha-Methyl-24-ethylcholesta-7,25-dien-3beta-ylacetate	46.36	0.84
	MOL009615	24-Methylenecycloartan-3beta,21-diol	37.32	0.8
	MOL009617	24-ethylcholest-22-enol	37.09	0.75
	MOL009618	24-ethylcholesta-5,22-dienol	43.83	0.76
	MOL009620	24-methyl-31-norlanost-9(11)-enol	38	0.75
	MOL009621	24-methylenelanost-8-enol	42.37	0.77
	MOL009622	Fucosterol	43.78	0.76
	MOL009631	31-Norcyclolaudenol	38.68	0.81
	MOL009633	31-norlanost-9(11)-enol	38.35	0.72
	MOL009634	31-norlanosterol	42.2	0.73
	MOL009635	4,24-methyllophenol	37.83	0.75
	MOL009639	Lophenol	38.13	0.71
	MOL009640	4alpha,14alpha,24-trimethylcholesta-8,24-dienol	38.91	0.76
	MOL009641	4alpha,24-dimethylcholesta-7,24-dienol	42.65	0.75
	MOL009642	4alpha-methyl-24-ethylcholesta-7,24-dienol	42.3	0.78
	MOL009644	6-Fluoroindole-7-Dehydrocholesterol	43.73	0.72
	MOL009646	7-O-Methylluteolin-6-C-beta-glucoside_qt	40.77	0.3
	MOL009650	Atropine	42.16	0.19
	MOL009651	Cryptoxanthin monoepoxide	46.95	0.56
	MOL009653	Cycloeucalenol	39.73	0.79
	MOL009656	(E,E)-1-ethyl octadeca-3,13-dienoate	42	0.19
	MOL009660	methyl (1R,4aS,7R,7aS)-4a,7-dihydroxy-7-methyl-1-[(2S,3R,4S,5S,6R)-3,4,5-trihydroxy-6-(hydroxymethyl)oxan-2-yl]oxy-1,5,6,7a-tetrahydrocyclopenta[d]pyran-4-carboxylate	39.43	0.47
	MOL009662	Lantadene A	38.68	0.57
	MOL009664	Physalin A	91.71	0.27
	MOL009665	Physcion-8-O-beta-D-gentiobioside/Physcion 8-gentiobioside	43.9	0.62
	MOL009677	lanost-8-en-3beta-ol	34.23	0.74
	MOL009678	lanost-8-enol	34.23	0.74
	MOL009681	Obtusifoliol	42.55	0.76
	MOL000098	quercetin	46.43	0.28
Angelica sinensis	MOL000358	beta-sitosterol	36.91	0.75
	MOL000449	Stigmasterol	43.83	0.76
Semen Cuscutae	MOL001558	sesamin	56.55	0.83
	MOL000184	NSC63551	39.25	0.76
	MOL000354	isorhamnetin	49.6	0.31
	MOL000358	beta-sitosterol	36.91	0.75
	MOL000422	kaempferol	41.88	0.24
	MOL005043	Campesterol	37.58	0.71
	MOL005440	Isofucosterol	43.78	0.76
	MOL005944	matrine	63.77	0.25
	MOL006649	sophranol	55.42	0.28
	MOL000953	CLR	37.87	0.68
	MOL000098	quercetin	46.43	0.28
Rhizoma atractylodis	MOL000173	wogonin	30.68	0.23
	MOL000179	2-Hydroxyisoxypropyl-3-hydroxy-7-isopentene-2,3-dihydrobenzofuran-5-carboxylic	45.2	0.2
	MOL000184	NSC63551	39.25	0.76
	MOL000186	Stigmasterol 3-O-beta-D-glucopyranoside_qt	43.83	0.76
	MOL000188	3β-acetoxyatractylone	40.57	0.22
	MOL000085	beta-daucosterol_qt	36.91	0.75
	MOL000088	beta-sitosterol 3-O-glucoside_qt	36.91	0.75
	MOL000092	daucosterin_qt	36.91	0.76
	MOL000094	daucosterol_qt	36.91	0.76
Ligusticum wallichii	MOL001494	Mandenol	42	0.19
	MOL002135	Myricanone	40.6	0.51
	MOL002140	Perlolyrine	65.95	0.27
	MOL002151	senkyunone	47.66	0.24
	MOL002157	wallichilide	42.31	0.71
	MOL000359	sitosterol	36.91	0.75
	MOL000433	FA	68.96	0.71
Salvia miltiorrhiza	MOL001601	1,2,5,6-tetrahydrotanshinone	38.75	0.36
	MOL001659	Poriferasterol	43.83	0.76
	MOL001771	poriferast-5-en-3beta-ol/Clionasterol	36.91	0.75
	MOL001942	isoimperatorin	45.46	0.23
	MOL002222	sugiol	36.11	0.28
	MOL002651	Dehydrotanshinone II A	43.76	0.4
	MOL002776	Baicalin	40.12	0.75
	MOL000569	digallate	61.85	0.26
	MOL000006	luteolin	36.16	0.25
	MOL006824	α-amyrin	39.51	0.76
	MOL007036	5,6-dihydroxy-7-isopropyl-1,1-dimethyl-2,3-dihydrophenanthren-4-one	33.77	0.29
	MOL007041	2-isopropyl-8-methylphenanthrene-3,4-dione	40.86	0.23
	MOL007045	3α-hydroxytanshinoneⅡa	44.93	0.44
	MOL007048	(E)-3-[2-(3,4-dihydroxyphenyl)-7-hydroxy-benzofuran-4-yl]acrylic acid	48.24	0.31
	MOL007049	4-methylenemiltirone	34.35	0.23
	MOL007050	2-(4-hydroxy-3-methoxyphenyl)-5-(3-hydroxypropyl)-7-methoxy-3-benzofurancarboxaldehyde	62.78	0.4
	MOL007051	6-o-syringyl-8-o-acetyl shanzhiside methyl ester	46.69	0.71
	MOL007058	formyltanshinone	73.44	0.42
	MOL007059	3-beta-Hydroxymethyllenetanshiquinone	32.16	0.41
	MOL007061	Methylenetanshinquinone	37.07	0.36
	MOL007063	przewalskin a	37.11	0.65
	MOL007064	przewalskin b	110.32	0.44
	MOL007068	Przewaquinone B	62.24	0.41
	MOL007069	przewaquinone c	55.74	0.4
	MOL007070	(6S,7R)-6,7-dihydroxy-1,6-dimethyl-8,9-dihydro-7H-naphtho[8,7-g]benzofuran-10,11-dione	41.31	0.45
	MOL007071	przewaquinone f	40.31	0.46
	MOL007077	sclareol	43.67	0.21
	MOL007079	tanshinaldehyde	52.47	0.45
	MOL007081	Danshenol B	57.95	0.56
	MOL007082	Danshenol A	56.97	0.52
	MOL007085	Salvilenone	30.38	0.38
	MOL007088	cryptotanshinone	52.34	0.4
	MOL007093	dan-shexinkum d	38.88	0.55
	MOL007094	danshenspiroketallactone	50.43	0.31
	MOL007098	deoxyneocryptotanshinone	49.4	0.29
	MOL007100	dihydrotanshinlactone	38.68	0.32
	MOL007101	dihydrotanshinoneⅠ	45.04	0.36
	MOL007105	epidanshenspiroketallactone	68.27	0.31
	MOL007107	C09092/Ferruginol	36.07	0.25
	MOL007108	isocryptotanshi-none	54.98	0.39
	MOL007111	Isotanshinone II	49.92	0.4
	MOL007115	manool	45.04	0.2
	MOL007118	microstegiol	39.61	0.28
	MOL007119	miltionone Ⅰ	49.68	0.32
	MOL007120	miltionone Ⅱ	71.03	0.44
	MOL007121	miltipolone	36.56	0.37
	MOL007122	Miltirone	38.76	0.25
	MOL007123	miltirone Ⅱ	44.95	0.24
	MOL007124	neocryptotanshinone ii	39.46	0.23
	MOL007125	neocryptotanshinone	52.49	0.32
	MOL007127	1-methyl-8,9-dihydro-7H-naphtho[5,6-g]benzofuran-6,10,11-trione	34.72	0.37
	MOL007130	prolithospermic acid	64.37	0.31
	MOL007132	(2R)-3-(3,4-dihydroxyphenyl)-2-[(Z)-3-(3,4-dihydroxyphenyl)acryloyl]oxy-propionic acid	109.38	0.35
	MOL007140	(Z)-3-[2-[(E)-2-(3,4-dihydroxyphenyl)vinyl]-3,4-dihydroxy-phenyl]acrylic acid	88.54	0.26
	MOL007141	salvianolic acid g	45.56	0.61
	MOL007142	salvianolic acid j	43.38	0.72
	MOL007143	salvilenone Ⅰ	32.43	0.23
	MOL007145	salviolone	31.72	0.24
	MOL007149	NSC 122421	34.49	0.28
	MOL007150	(6S)-6-hydroxy-1-methyl-6-methylol-8,9-dihydro-7H-naphtho[8,7-g]benzofuran-10,11-quinone	75.39	0.46
	MOL007151	Tanshindiol B	42.67	0.45
	MOL007152	Przewaquinone E	42.85	0.45
	MOL007154	tanshinone iia	49.89	0.4
	MOL007155	(6S)-6-(hydroxymethyl)-1,6-dimethyl-8,9-dihydro-7H-naphtho[8,7-g]benzofuran-10,11-dione	65.26	0.45
	MOL007156	tanshinone Ⅵ	45.64	0.3
Codonopsis pilosula	MOL008393	7-(beta-Xylosyl)cephalomannine_qt	38.33	0.29
	MOL008397	Daturilin	50.37	0.77
	MOL008400	glycitein	50.48	0.24
	MOL008406	Spinoside A	39.97	0.4
	MOL008407	(8S,9S,10R,13R,14S,17R)-17-[(E,2R,5S)-5-ethyl-6-methylhept-3-en-2-yl]-10,13-dimethyl-1,2,4,7,8,9,11,12,14,15,16,17-dodecahydrocyclopenta[a]phenanthren-3-one/Stigmasterone	45.4	0.76
	MOL008411	11-Hydroxyrankinidine	40	0.66
	MOL001006	poriferasta-7,22E-dien-3beta-ol/Chondrillasterol	42.98	0.76
	MOL002140	Perlolyrine	65.95	0.27
	MOL002879	Diop	43.59	0.39
	MOL003036	ZINC03978781	43.83	0.76
	MOL000449	Stigmasterol	43.83	0.76
	MOL003896	7-Methoxy-2-methyl isoflavone	42.56	0.2
	MOL004355	Spinasterol	42.98	0.76
	MOL004492	Chrysanthemaxanthin	38.72	0.58
	MOL005321	Frutinone A	65.9	0.34
	MOL000006	luteolin	36.16	0.25
	MOL006554	Taraxerol	38.4	0.77
	MOL006774	stigmast-7-enol/Schottenol	37.42	0.75
	MOL007059	3-beta-Hydroxymethyllenetanshiquinone	32.16	0.41
	MOL007514	methyl icosa-11,14-dienoate	39.67	0.23
	MOL008391	5alpha-Stigmastan-3,6-dione	33.12	0.79

## Sheet: Table S2
Table S1 The active compounds and relative targets screened from Lingqihuangban Granule by ETCM database
Herb	Component	Target	Druglikeness Grading	prediction confidence index
Cistanche	Succinic Acid	ACO2	Moderate	≥0.80
Cistanche	Succinic Acid	ALAD	Moderate	≥0.80
Cistanche	Succinic Acid	TYR	Moderate	≥0.80
Cistanche	Succinic Acid	SRD5A2	Moderate	≥0.80
Cistanche	Succinic Acid	AKR1D1	Moderate	≥0.80
Cistanche	Succinic Acid	HBB	Moderate	≥0.80
Cistanche	Succinic Acid	HBA1	Moderate	≥0.80
Cistanche	Succinic Acid	SLC22A6	Moderate	≥0.80
Cistanche	Succinic Acid	SLC22A8	Moderate	≥0.80
Cistanche	Succinic Acid	SLC22A11	Moderate	≥0.80
Cistanche	Succinic Acid	SLC22A7	Moderate	≥0.80
Cistanche	Succinic Acid	SDHD	Moderate	≥0.80
Cistanche	Succinic Acid	HSD17B6	Moderate	≥0.80
Cistanche	Succinic Acid	P4HA2	Moderate	≥0.80
Cistanche	Succinic Acid	PLOD3	Moderate	≥0.80
Cistanche	Succinic Acid	BBOX1	Moderate	≥0.80
Cistanche	Succinic Acid	P4HA1	Moderate	≥0.80
Cistanche	Succinic Acid	SDHB	Moderate	≥0.80
Cistanche	Succinic Acid	SDHA	Moderate	≥0.80
Cistanche	Succinic Acid	ALDH5A1	Moderate	≥0.80
Cistanche	Succinic Acid	SUCLG1	Moderate	≥0.80
Cistanche	Succinic Acid	OXCT1	Moderate	≥0.80
Cistanche	Succinic Acid	PLOD1	Moderate	≥0.80
Cistanche	Succinic Acid	ASPH	Moderate	≥0.80
Cistanche	Succinic Acid	SLC13A2	Moderate	≥0.80
Cistanche	Succinic Acid	LEPRE1	Moderate	≥0.80
Cistanche	Succinic Acid	LEPREL1	Moderate	≥0.80
Cistanche	Succinic Acid	LEPREL2	Moderate	≥0.80
Cistanche	Succinic Acid	SLC13A3	Moderate	≥0.80
Cistanche	Succinic Acid	SUCLG2	Moderate	≥0.80
Cistanche	Succinic Acid	SDHC	Moderate	≥0.80
Cistanche	Succinic Acid	SUCNR1	Moderate	≥0.80
Cistanche	Succinic Acid	OXCT2	Moderate	≥0.80
Cistanche	Succinic Acid	SLC13A1	Moderate	≥0.80
Cistanche	Succinic Acid	TMLHE	Moderate	≥0.80
Cistanche	Succinic Acid	SUCLA2	Moderate	≥0.80
Cistanche	Succinic Acid	SLC25A10	Moderate	≥0.80
Lucid ganoderma	Ergosterol	ALB	Moderate	≥0.80
Lucid ganoderma	Ergosterol	SHBG	Moderate	≥0.80
Lucid ganoderma	Ergosterol	PGR	Moderate	≥0.80
Lucid ganoderma	Ergosterol	ABCB1	Moderate	≥0.80
Lucid ganoderma	Ergosterol	CYP3A4	Moderate	≥0.80
Lucid ganoderma	Ergosterol	CYP3A5	Moderate	≥0.80
Lucid ganoderma	Ergosterol	CYP3A7	Moderate	≥0.80
Lucid ganoderma	Ergosterol	CYP2C19	Moderate	≥0.80
Lucid ganoderma	Ergosterol	NR3C1	Moderate	≥0.80
Lucid ganoderma	Ergosterol	SERPINA6	Moderate	≥0.80
Lucid ganoderma	Ergosterol	ESR1	Moderate	≥0.80
Lucid ganoderma	Ergosterol	CYP27B1	Moderate	≥0.80
Lucid ganoderma	Ergosterol	VDR	Moderate	≥0.80
Lucid ganoderma	Ergosterol	CYP24A1	Moderate	≥0.80
Lucid ganoderma	Ergosterol	SLC22A1	Moderate	≥0.80
Lucid ganoderma	Ergosterol	SLC22A3	Moderate	≥0.80
Lucid ganoderma	Ergosterol	CYP1A1	Moderate	≥0.80
Lucid ganoderma	Ergosterol	CYP11A1	Moderate	≥0.80
Lucid ganoderma	Ergosterol	NR3C2	Moderate	≥0.80
Lucid ganoderma	Ergosterol	AR	Moderate	≥0.80
Lucid ganoderma	Ergosterol	CYP2C8	Moderate	≥0.80
Lucid ganoderma	Ergosterol	CYP19A1	Moderate	≥0.80
Lucid ganoderma	Ergosterol	CYP2C9	Moderate	≥0.80
Lucid ganoderma	Ergosterol	CYP2B6	Moderate	≥0.80
Lucid ganoderma	Ergosterol	MAOA	Moderate	≥0.80
Lucid ganoderma	Ergosterol	SLCO1A2	Moderate	≥0.80
Lucid ganoderma	Ergosterol	AKR1C2	Moderate	≥0.80
Lucid ganoderma	Ergosterol	AKR1C1	Moderate	≥0.80
Lucid ganoderma	Ergosterol	SLC10A1	Moderate	≥0.80
Lucid ganoderma	Ergosterol	NCOA2	Moderate	≥0.80
Lucid ganoderma	Ergosterol	CYP1B1	Moderate	≥0.80
Lucid ganoderma	Ergosterol	CYP2A13	Moderate	≥0.80
Lucid ganoderma	Ergosterol	SLC22A8	Moderate	≥0.80
Lucid ganoderma	Ergosterol	SLC22A4	Moderate	≥0.80
Lucid ganoderma	Ergosterol	CYP3A43	Moderate	≥0.80
Lucid ganoderma	Ergosterol	ABCG2	Moderate	≥0.80
Lucid ganoderma	Ergosterol	SLC22A7	Moderate	≥0.80
Lucid ganoderma	Ergosterol	SULT2B1	Moderate	≥0.80
Lucid ganoderma	Ergosterol	GABRP	Moderate	≥0.80
Lucid ganoderma	Ergosterol	GABRD	Moderate	≥0.80
Lucid ganoderma	Ergosterol	GRIN2D	Moderate	≥0.80
Lucid ganoderma	Ergosterol	GRIN3B	Moderate	≥0.80
Lucid ganoderma	Ergosterol	NR1I2	Moderate	≥0.80
Lucid ganoderma	Ergosterol	HSD17B1	Moderate	≥0.80
Lucid ganoderma	Ergosterol	GABRA1	Moderate	≥0.80
Lucid ganoderma	Ergosterol	GABRB1	Moderate	≥0.80
Lucid ganoderma	Ergosterol	GABRG2	Moderate	≥0.80
Lucid ganoderma	Ergosterol	GABRB3	Moderate	≥0.80
Lucid ganoderma	Ergosterol	GABRA5	Moderate	≥0.80
Lucid ganoderma	Ergosterol	GABRA3	Moderate	≥0.80
Lucid ganoderma	Ergosterol	GABRA2	Moderate	≥0.80
Lucid ganoderma	Ergosterol	GABRB2	Moderate	≥0.80
Lucid ganoderma	Ergosterol	GABRA4	Moderate	≥0.80
Lucid ganoderma	Ergosterol	GABRE	Moderate	≥0.80
Lucid ganoderma	Ergosterol	GRIN1	Moderate	≥0.80
Lucid ganoderma	Ergosterol	SULT2A1	Moderate	≥0.80
Lucid ganoderma	Ergosterol	PPARA	Moderate	≥0.80
Lucid ganoderma	Ergosterol	GRIN2A	Moderate	≥0.80
Lucid ganoderma	Ergosterol	GRIN2B	Moderate	≥0.80
Lucid ganoderma	Ergosterol	GRIN2C	Moderate	≥0.80
Lucid ganoderma	Ergosterol	NR1I3	Moderate	≥0.80
Lucid ganoderma	Ergosterol	GABRA6	Moderate	≥0.80
Lucid ganoderma	Ergosterol	GABRG1	Moderate	≥0.80
Lucid ganoderma	Ergosterol	GRIN3A	Moderate	≥0.80
Lucid ganoderma	Ergosterol	ESR2	Moderate	≥0.80
Lucid ganoderma	Ergosterol	SIGMAR1	Moderate	≥0.80
Lucid ganoderma	Ergosterol	GABRG3	Moderate	≥0.80
Lucid ganoderma	Ergosterol	GABRQ	Moderate	≥0.80
Lucid ganoderma	Ergosterol	GC	Moderate	≥0.80
Lucid ganoderma	Ergosterol	CYP2D6	Moderate	≥0.80
Lucid ganoderma	Ergosterol	CYP2J2	Moderate	≥0.80
Lucid ganoderma	Ergosterol	CYP27A1	Moderate	≥0.80
Lucid ganoderma	Ergosterol	SLC10A6	Moderate	≥0.80
Lucid ganoderma	Ergosterol	CYP2R1	Moderate	≥0.80
Lucid ganoderma	Ergosterol	LSS	Moderate	≥0.80
Lucid ganoderma	Ergosterol	RORA	Moderate	≥0.80
Lucid ganoderma	Ergosterol	CLEC4E	Moderate	≥0.80
Lucid ganoderma	Adenosine	ABCC4	Moderate	≥0.80
Lucid ganoderma	Adenosine	ABCC5	Moderate	≥0.80
Lucid ganoderma	Adenosine	PRKAR1A	Moderate	≥0.80
Lucid ganoderma	Adenosine	PRKAR2B	Moderate	≥0.80
Lucid ganoderma	Adenosine	SLC22A6	Moderate	≥0.80
Lucid ganoderma	Adenosine	SLC22A8	Moderate	≥0.80
Lucid ganoderma	Adenosine	ABCC11	Moderate	≥0.80
Lucid ganoderma	Adenosine	HCN2	Moderate	≥0.80
Lucid ganoderma	Adenosine	SLC22A7	Moderate	≥0.80
Lucid ganoderma	Adenosine	TRDMT1	Moderate	≥0.80
Lucid ganoderma	Adenosine	PRMT3	Moderate	≥0.80
Lucid ganoderma	Adenosine	ADA	Moderate	≥0.80
Lucid ganoderma	Adenosine	PNMT	Moderate	≥0.80
Lucid ganoderma	Adenosine	PCMT1	Moderate	≥0.80
Lucid ganoderma	Adenosine	HNMT	Moderate	≥0.80
Lucid ganoderma	Adenosine	GAMT	Moderate	≥0.80
Lucid ganoderma	Adenosine	GNMT	Moderate	≥0.80
Lucid ganoderma	Adenosine	COMTD1	Moderate	≥0.80
Lucid ganoderma	Adenosine	SETD7	Moderate	≥0.80
Lucid ganoderma	Adenosine	PRMT1	Moderate	≥0.80
Lucid ganoderma	Adenosine	DPH5	Moderate	≥0.80
Lucid ganoderma	Adenosine	RNASE1	Moderate	≥0.80
Lucid ganoderma	Adenosine	LSM6	Moderate	≥0.80
Lucid ganoderma	Adenosine	SLC29A1	Moderate	≥0.80
Lucid ganoderma	Adenosine	AK1	Moderate	≥0.80
Lucid ganoderma	Adenosine	GAPDH	Moderate	≥0.80
Lucid ganoderma	Adenosine	EEF2	Moderate	≥0.80
Lucid ganoderma	Adenosine	AK2	Moderate	≥0.80
Lucid ganoderma	Adenosine	AK8	Moderate	≥0.80
Lucid ganoderma	Adenosine	SIRT3	Moderate	≥0.80
Lucid ganoderma	Adenosine	SIRT5	Moderate	≥0.80
Lucid ganoderma	Adenosine	PNP	Moderate	≥0.80
Lucid ganoderma	Adenosine	ADORA2A	Moderate	≥0.80
Lucid ganoderma	Adenosine	SLC22A2	Moderate	≥0.80
Lucid ganoderma	Adenosine	SLC22A1	Moderate	≥0.80
Lucid ganoderma	Adenosine	POLA1	Moderate	≥0.80
Lucid ganoderma	Adenosine	RRM1	Moderate	≥0.80
Lucid ganoderma	Adenosine	DCK	Moderate	≥0.80
Lucid ganoderma	Adenosine	RRM2	Moderate	≥0.80
Lucid ganoderma	Adenosine	POLE2	Moderate	≥0.80
Lucid ganoderma	Adenosine	RRM2B	Moderate	≥0.80
Lucid ganoderma	Adenosine	SLC28A3	Moderate	≥0.80
Lucid ganoderma	Adenosine	POLE4	Moderate	≥0.80
Lucid ganoderma	Adenosine	POLE3	Moderate	≥0.80
Lucid ganoderma	Adenosine	ABCG2	Moderate	≥0.80
Lucid ganoderma	Adenosine	MTAP	Moderate	≥0.80
Lucid ganoderma	Adenosine	PRKAB2	Moderate	≥0.80
Lucid ganoderma	Adenosine	PYGL	Moderate	≥0.80
Lucid ganoderma	Adenosine	APRT	Moderate	≥0.80
Lucid ganoderma	Adenosine	FBP1	Moderate	≥0.80
Lucid ganoderma	Adenosine	PIM1	Moderate	≥0.80
Lucid ganoderma	Adenosine	CREB1	Moderate	≥0.80
Lucid ganoderma	Adenosine	AMPD1	Moderate	≥0.80
Lucid ganoderma	Adenosine	ACSL1	Moderate	≥0.80
Lucid ganoderma	Adenosine	HINT1	Moderate	≥0.80
Lucid ganoderma	Adenosine	FHIT	Moderate	≥0.80
Lucid ganoderma	Adenosine	ADK	Moderate	≥0.80
Lucid ganoderma	Adenosine	PDE4B	Moderate	≥0.80
Lucid ganoderma	Adenosine	PDE4D	Moderate	≥0.80
Lucid ganoderma	Adenosine	ADCY1	Moderate	≥0.80
Lucid ganoderma	Adenosine	PRKAA1	Moderate	≥0.80
Lucid ganoderma	Adenosine	ACSS2	Moderate	≥0.80
Lucid ganoderma	Adenosine	ACSS1	Moderate	≥0.80
Lucid ganoderma	Adenosine	PRKAB1	Moderate	≥0.80
Lucid ganoderma	Adenosine	CSNK2A1	Moderate	≥0.80
Lucid ganoderma	Adenosine	APAF1	Moderate	≥0.80
Lucid ganoderma	Adenosine	ASNA1	Moderate	≥0.80
Lucid ganoderma	Adenosine	ABCC9	Moderate	≥0.80
Lucid ganoderma	Adenosine	ABCC6	Moderate	≥0.80
Lucid ganoderma	Adenosine	ABCB11	Moderate	≥0.80
Lucid ganoderma	Adenosine	ABCA1	Moderate	≥0.80
Lucid ganoderma	Adenosine	ABL1	Moderate	≥0.80
Lucid ganoderma	Adenosine	ASS1	Moderate	≥0.80
Lucid ganoderma	Adenosine	ABCB1	Moderate	≥0.80
Lucid ganoderma	Adenosine	ASNS	Moderate	≥0.80
Lucid ganoderma	Adenosine	ARAF	Moderate	≥0.80
Lucid ganoderma	Adenosine	SLC25A4	Moderate	≥0.80
Lucid ganoderma	Adenosine	CFTR	Moderate	≥0.80
Lucid ganoderma	Adenosine	NME1	Moderate	≥0.80
Lucid ganoderma	Adenosine	ADRBK1	Moderate	≥0.80
Lucid ganoderma	Adenosine	AKT1	Moderate	≥0.80
Lucid ganoderma	Adenosine	ABCC1	Moderate	≥0.80
Lucid ganoderma	Adenosine	ADRBK2	Moderate	≥0.80
Lucid ganoderma	Adenosine	ACVR1B	Moderate	≥0.80
Lucid ganoderma	Adenosine	ACVRL1	Moderate	≥0.80
Lucid ganoderma	Adenosine	PIK3CA	Moderate	≥0.80
Lucid ganoderma	Adenosine	ABL2	Moderate	≥0.80
Lucid ganoderma	Adenosine	ABCG1	Moderate	≥0.80
Lucid ganoderma	Adenosine	NT5C2	Moderate	≥0.80
Lucid ganoderma	Adenosine	PPP5C	Moderate	≥0.80
Lucid ganoderma	Adenosine	CSNK2B	Moderate	≥0.80
Lucid ganoderma	Adenosine	ACVR1	Moderate	≥0.80
Lucid ganoderma	Adenosine	TNK2	Moderate	≥0.80
Lucid ganoderma	Adenosine	ABCC8	Moderate	≥0.80
Lucid ganoderma	Adenosine	NAE1	Moderate	≥0.80
Lucid ganoderma	Adenosine	AMHR2	Moderate	≥0.80
Lucid ganoderma	Adenosine	ABCC2	Moderate	≥0.80
Lucid ganoderma	Adenosine	P2RY11	Moderate	≥0.80
Lucid ganoderma	Adenosine	CDK15	Moderate	≥0.80
Lucid ganoderma	Adenosine	TLR7	Moderate	≥0.80
Lucid ganoderma	Adenosine	ALK	Moderate	≥0.80
Lucid ganoderma	Adenosine	AFG3L2	Moderate	≥0.80
Lucid ganoderma	Adenosine	RPL3	Moderate	≥0.80
Lucid ganoderma	Adenosine	RPL13A	Moderate	≥0.80
Lucid ganoderma	Adenosine	RPL15	Moderate	≥0.80
Lucid ganoderma	Adenosine	RPL37	Moderate	≥0.80
Lucid ganoderma	Adenosine	RPL23A	Moderate	≥0.80
Lucid ganoderma	Adenosine	RPL23	Moderate	≥0.80
Lucid ganoderma	Adenosine	RPL11	Moderate	≥0.80
Lucid ganoderma	Adenosine	RPL8	Moderate	≥0.80
Lucid ganoderma	Adenosine	RPL19	Moderate	≥0.80
Lucid ganoderma	Adenosine	RPL10L	Moderate	≥0.80
Lucid ganoderma	Adenosine	RSL24D1	Moderate	≥0.80
Lucid ganoderma	Adenosine	RPL26L1	Moderate	≥0.80
Lucid ganoderma	Adenosine	IMPDH2	Moderate	≥0.80
Lucid ganoderma	Adenosine	IMPDH1	Moderate	≥0.80
Lucid ganoderma	Adenosine	ENPP1	Moderate	≥0.80
Lucid ganoderma	Adenosine	DNMT1	Moderate	≥0.80
Lucid ganoderma	Adenosine	CDA	Moderate	≥0.80
Lucid ganoderma	Adenosine	GAPDHS	Moderate	≥0.80
Lucid ganoderma	Adenosine	HSPA8	Moderate	≥0.80
Lucid ganoderma	Adenosine	BAG1	Moderate	≥0.80
Lucid ganoderma	Adenosine	HSP90B1	Moderate	≥0.80
Lucid ganoderma	Adenosine	POLB	Moderate	≥0.80
Lucid ganoderma	Adenosine	CYP3A4	Moderate	≥0.80
Lucid ganoderma	Adenosine	NT5E	Moderate	≥0.80
Lucid ganoderma	Adenosine	DCTD	Moderate	≥0.80
Lucid ganoderma	Adenosine	ABCC10	Moderate	≥0.80
Lucid ganoderma	Adenosine	UCK2	Moderate	≥0.80
Lucid ganoderma	Adenosine	ADORA1	Moderate	≥0.80
Lucid ganoderma	Adenosine	LCK	Moderate	≥0.80
Lucid ganoderma	Adenosine	IGF1R	Moderate	≥0.80
Lucid ganoderma	Adenosine	HK1	Moderate	≥0.80
Lucid ganoderma	Adenosine	ITPKA	Moderate	≥0.80
Lucid ganoderma	Adenosine	DTYMK	Moderate	≥0.80
Lucid ganoderma	Adenosine	EPHA2	Moderate	≥0.80
Lucid ganoderma	Adenosine	EPHB2	Moderate	≥0.80
Lucid ganoderma	Adenosine	GSS	Moderate	≥0.80
Lucid ganoderma	Adenosine	CCT3	Moderate	≥0.80
Lucid ganoderma	Adenosine	GSK3B	Moderate	≥0.80
Lucid ganoderma	Adenosine	GALK1	Moderate	≥0.80
Lucid ganoderma	Adenosine	DAPK1	Moderate	≥0.80
Lucid ganoderma	Adenosine	MAPK12	Moderate	≥0.80
Lucid ganoderma	Adenosine	MAPK10	Moderate	≥0.80
Lucid ganoderma	Adenosine	VCP	Moderate	≥0.80
Lucid ganoderma	Adenosine	ACTA1	Moderate	≥0.80
Lucid ganoderma	Adenosine	SRPK2	Moderate	≥0.80
Lucid ganoderma	Adenosine	TOP2B	Moderate	≥0.80
Lucid ganoderma	Adenosine	RAD51	Moderate	≥0.80
Lucid ganoderma	Adenosine	KIF1A	Moderate	≥0.80
Lucid ganoderma	Adenosine	PFKFB4	Moderate	≥0.80
Lucid ganoderma	Adenosine	TRPM7	Moderate	≥0.80
Lucid ganoderma	Adenosine	KIF2C	Moderate	≥0.80
Lucid ganoderma	Adenosine	DGUOK	Moderate	≥0.80
Lucid ganoderma	Adenosine	MAPK3	Moderate	≥0.80
Lucid ganoderma	Adenosine	CSNK1G2	Moderate	≥0.80
Lucid ganoderma	Adenosine	GSG2	Moderate	≥0.80
Lucid ganoderma	Adenosine	AHCY	Moderate	≥0.80
Lucid ganoderma	Adenosine	XDH	Moderate	≥0.80
Lucid ganoderma	Adenosine	ADORA2B	Moderate	≥0.80
Lucid ganoderma	5,6-Dihydroergosterol	GC	Moderate	≥0.80
Lucid ganoderma	5,6-Dihydroergosterol	CYP3A4	Moderate	≥0.80
Lucid ganoderma	5,6-Dihydroergosterol	VDR	Moderate	≥0.80
Lucid ganoderma	5,6-Dihydroergosterol	HOXA10	Moderate	≥0.80
Lucid ganoderma	5,6-Dihydroergosterol	HSD11B2	Moderate	≥0.80
Lucid ganoderma	5,6-Dihydroergosterol	CYP24A1	Moderate	≥0.80
Lucid ganoderma	5,6-Dihydroergosterol	SHBG	Moderate	≥0.80
Lucid ganoderma	5,6-Dihydroergosterol	AR	Moderate	≥0.80
Lucid ganoderma	5,6-Dihydroergosterol	CYP19A1	Moderate	≥0.80
Lucid ganoderma	5,6-Dihydroergosterol	GABRA1	Moderate	≥0.80
Lucid ganoderma	5,6-Dihydroergosterol	GABRA5	Moderate	≥0.80
Lucid ganoderma	5,6-Dihydroergosterol	GABRA3	Moderate	≥0.80
Lucid ganoderma	5,6-Dihydroergosterol	GABRA2	Moderate	≥0.80
Lucid ganoderma	5,6-Dihydroergosterol	GABRA4	Moderate	≥0.80
Lucid ganoderma	5,6-Dihydroergosterol	GABRA6	Moderate	≥0.80
Lucid ganoderma	5,6-Dihydroergosterol	UGT1A4	Moderate	≥0.80
Lucid ganoderma	5,6-Dihydroergosterol	NR1I3	Moderate	≥0.80
Lucid ganoderma	5,6-Dihydroergosterol	ALB	Moderate	≥0.80
Lucid ganoderma	5,6-Dihydroergosterol	PGR	Moderate	≥0.80
Lucid ganoderma	5,6-Dihydroergosterol	ABCB1	Moderate	≥0.80
Lucid ganoderma	5,6-Dihydroergosterol	CYP3A5	Moderate	≥0.80
Lucid ganoderma	5,6-Dihydroergosterol	CYP3A7	Moderate	≥0.80
Lucid ganoderma	5,6-Dihydroergosterol	CYP2C19	Moderate	≥0.80
Lucid ganoderma	5,6-Dihydroergosterol	NR3C1	Moderate	≥0.80
Lucid ganoderma	5,6-Dihydroergosterol	SERPINA6	Moderate	≥0.80
Lucid ganoderma	5,6-Dihydroergosterol	SULT2B1	Moderate	≥0.80
Lucid ganoderma	5,6-Dihydroergosterol	GABRP	Moderate	≥0.80
Lucid ganoderma	5,6-Dihydroergosterol	GABRD	Moderate	≥0.80
Lucid ganoderma	5,6-Dihydroergosterol	GRIN2D	Moderate	≥0.80
Lucid ganoderma	5,6-Dihydroergosterol	GRIN3B	Moderate	≥0.80
Lucid ganoderma	5,6-Dihydroergosterol	NR1I2	Moderate	≥0.80
Lucid ganoderma	5,6-Dihydroergosterol	ESR1	Moderate	≥0.80
Lucid ganoderma	5,6-Dihydroergosterol	HSD17B1	Moderate	≥0.80
Lucid ganoderma	5,6-Dihydroergosterol	GABRB1	Moderate	≥0.80
Lucid ganoderma	5,6-Dihydroergosterol	GABRG2	Moderate	≥0.80
Lucid ganoderma	5,6-Dihydroergosterol	GABRB3	Moderate	≥0.80
Lucid ganoderma	5,6-Dihydroergosterol	GABRB2	Moderate	≥0.80
Lucid ganoderma	5,6-Dihydroergosterol	GABRE	Moderate	≥0.80
Lucid ganoderma	5,6-Dihydroergosterol	GRIN1	Moderate	≥0.80
Lucid ganoderma	5,6-Dihydroergosterol	SULT2A1	Moderate	≥0.80
Lucid ganoderma	5,6-Dihydroergosterol	PPARA	Moderate	≥0.80
Lucid ganoderma	5,6-Dihydroergosterol	GRIN2A	Moderate	≥0.80
Lucid ganoderma	5,6-Dihydroergosterol	GRIN2B	Moderate	≥0.80
Lucid ganoderma	5,6-Dihydroergosterol	GRIN2C	Moderate	≥0.80
Lucid ganoderma	5,6-Dihydroergosterol	GABRG1	Moderate	≥0.80
Lucid ganoderma	5,6-Dihydroergosterol	GRIN3A	Moderate	≥0.80
Lucid ganoderma	5,6-Dihydroergosterol	ESR2	Moderate	≥0.80
Lucid ganoderma	5,6-Dihydroergosterol	SIGMAR1	Moderate	≥0.80
Lucid ganoderma	5,6-Dihydroergosterol	GABRG3	Moderate	≥0.80
Lucid ganoderma	5,6-Dihydroergosterol	GABRQ	Moderate	≥0.80
Lucid ganoderma	5,6-Dihydroergosterol	CYP27B1	Moderate	≥0.80
Lucid ganoderma	5,6-Dihydroergosterol	SLC22A1	Moderate	≥0.80
Lucid ganoderma	5,6-Dihydroergosterol	SLC22A3	Moderate	≥0.80
Lucid ganoderma	5,6-Dihydroergosterol	CYP1A1	Moderate	≥0.80
Lucid ganoderma	5,6-Dihydroergosterol	CYP11A1	Moderate	≥0.80
Lucid ganoderma	5,6-Dihydroergosterol	NR3C2	Moderate	≥0.80
Lucid ganoderma	5,6-Dihydroergosterol	CYP2C8	Moderate	≥0.80
Lucid ganoderma	5,6-Dihydroergosterol	CYP2D6	Moderate	≥0.80
Lucid ganoderma	5,6-Dihydroergosterol	CYP2C9	Moderate	≥0.80
Lucid ganoderma	5,6-Dihydroergosterol	CYP2B6	Moderate	≥0.80
Lucid ganoderma	5,6-Dihydroergosterol	MAOA	Moderate	≥0.80
Lucid ganoderma	5,6-Dihydroergosterol	SLCO1A2	Moderate	≥0.80
Lucid ganoderma	5,6-Dihydroergosterol	CYP2J2	Moderate	≥0.80
Lucid ganoderma	5,6-Dihydroergosterol	AKR1C2	Moderate	≥0.80
Lucid ganoderma	5,6-Dihydroergosterol	CYP27A1	Moderate	≥0.80
Lucid ganoderma	5,6-Dihydroergosterol	AKR1C1	Moderate	≥0.80
Lucid ganoderma	5,6-Dihydroergosterol	SLC10A1	Moderate	≥0.80
Lucid ganoderma	5,6-Dihydroergosterol	NCOA2	Moderate	≥0.80
Lucid ganoderma	5,6-Dihydroergosterol	CYP1B1	Moderate	≥0.80
Lucid ganoderma	5,6-Dihydroergosterol	CYP2A13	Moderate	≥0.80
Lucid ganoderma	5,6-Dihydroergosterol	SLC10A6	Moderate	≥0.80
Lucid ganoderma	5,6-Dihydroergosterol	CYP2R1	Moderate	≥0.80
Lucid ganoderma	5,6-Dihydroergosterol	SLC22A8	Moderate	≥0.80
Lucid ganoderma	5,6-Dihydroergosterol	SLC22A4	Moderate	≥0.80
Lucid ganoderma	5,6-Dihydroergosterol	CYP3A43	Moderate	≥0.80
Lucid ganoderma	5,6-Dihydroergosterol	ABCG2	Moderate	≥0.80
Lucid ganoderma	5,6-Dihydroergosterol	SLC22A7	Moderate	≥0.80
Lucid ganoderma	5,6-Dihydroergosterol	RXRA	Moderate	≥0.80
Lucid ganoderma	5,6-Dihydroergosterol	RORA	Moderate	≥0.80
Lucid ganoderma	5,6-Dihydroergosterol	CLEC4E	Moderate	≥0.80
Lucid ganoderma	5,6-Dihydroergosterol	LSS	Moderate	≥0.80
Lucid ganoderma	8Β,9Α-Dihydroganoderic Acid J	IGHG2	Moderate	≥0.80
Lucid ganoderma	8Β,9Α-Dihydroganoderic Acid J	HSD11B2	Moderate	≥0.80
Lucid ganoderma	8Β,9Α-Dihydroganoderic Acid J	SHBG	Moderate	≥0.80
Lucid ganoderma	8Β,9Α-Dihydroganoderic Acid J	AR	Moderate	≥0.80
Lucid ganoderma	8Β,9Α-Dihydroganoderic Acid J	CYP19A1	Moderate	≥0.80
Lucid ganoderma	8Β,9Α-Dihydroganoderic Acid J	GABRA1	Moderate	≥0.80
Lucid ganoderma	8Β,9Α-Dihydroganoderic Acid J	GABRA5	Moderate	≥0.80
Lucid ganoderma	8Β,9Α-Dihydroganoderic Acid J	GABRA3	Moderate	≥0.80
Lucid ganoderma	8Β,9Α-Dihydroganoderic Acid J	GABRA2	Moderate	≥0.80
Lucid ganoderma	8Β,9Α-Dihydroganoderic Acid J	GABRA4	Moderate	≥0.80
Lucid ganoderma	8Β,9Α-Dihydroganoderic Acid J	GABRA6	Moderate	≥0.80
Lucid ganoderma	8Β,9Α-Dihydroganoderic Acid J	HSD11B1	Moderate	≥0.80
Lucid ganoderma	8Β,9Α-Dihydroganoderic Acid J	ABCB11	Moderate	≥0.80
Lucid ganoderma	8Β,9Α-Dihydroganoderic Acid J	ABCC2	Moderate	≥0.80
Lucid ganoderma	8Β,9Α-Dihydroganoderic Acid J	ABCC3	Moderate	≥0.80
Lucid ganoderma	8Β,9Α-Dihydroganoderic Acid J	ABCC4	Moderate	≥0.80
Lucid ganoderma	8Β,9Α-Dihydroganoderic Acid J	NR1I2	Moderate	≥0.80
Lucid ganoderma	8Β,9Α-Dihydroganoderic Acid J	ADH1C	Moderate	≥0.80
Lucid ganoderma	8Β,9Α-Dihydroganoderic Acid J	COX1	Moderate	≥0.80
Lucid ganoderma	8Β,9Α-Dihydroganoderic Acid J	COX2	Moderate	≥0.80
Lucid ganoderma	8Β,9Α-Dihydroganoderic Acid J	PLA2G1B	Moderate	≥0.80
Lucid ganoderma	8Β,9Α-Dihydroganoderic Acid J	CYP2E1	Moderate	≥0.80
Lucid ganoderma	8Β,9Α-Dihydroganoderic Acid J	FABP1	Moderate	≥0.80
Lucid ganoderma	8Β,9Α-Dihydroganoderic Acid J	ABCB1	Moderate	≥0.80
Lucid ganoderma	8Β,9Α-Dihydroganoderic Acid J	CYP3A4	Moderate	≥0.80
Lucid ganoderma	8Β,9Α-Dihydroganoderic Acid J	GSTP1	Moderate	≥0.80
Lucid ganoderma	8Β,9Α-Dihydroganoderic Acid J	COX6C	Moderate	≥0.80
Lucid ganoderma	8Β,9Α-Dihydroganoderic Acid J	COX8A	Moderate	≥0.80
Lucid ganoderma	8Β,9Α-Dihydroganoderic Acid J	COX5B	Moderate	≥0.80
Lucid ganoderma	8Β,9Α-Dihydroganoderic Acid J	COX4I1	Moderate	≥0.80
Lucid ganoderma	8Β,9Α-Dihydroganoderic Acid J	COX6B1	Moderate	≥0.80
Lucid ganoderma	8Β,9Α-Dihydroganoderic Acid J	COX7C	Moderate	≥0.80
Lucid ganoderma	8Β,9Α-Dihydroganoderic Acid J	UGT2B7	Moderate	≥0.80
Lucid ganoderma	8Β,9Α-Dihydroganoderic Acid J	COX5A	Moderate	≥0.80
Lucid ganoderma	8Β,9Α-Dihydroganoderic Acid J	FECH	Moderate	≥0.80
Lucid ganoderma	8Β,9Α-Dihydroganoderic Acid J	CES1	Moderate	≥0.80
Lucid ganoderma	8Β,9Α-Dihydroganoderic Acid J	COX7A1	Moderate	≥0.80
Lucid ganoderma	8Β,9Α-Dihydroganoderic Acid J	COX7B	Moderate	≥0.80
Lucid ganoderma	8Β,9Α-Dihydroganoderic Acid J	ABCC1	Moderate	≥0.80
Lucid ganoderma	8Β,9Α-Dihydroganoderic Acid J	SLCO1A2	Moderate	≥0.80
Lucid ganoderma	8Β,9Α-Dihydroganoderic Acid J	FABP6	Moderate	≥0.80
Lucid ganoderma	8Β,9Α-Dihydroganoderic Acid J	AKR1C2	Moderate	≥0.80
Lucid ganoderma	8Β,9Α-Dihydroganoderic Acid J	ESRRG	Moderate	≥0.80
Lucid ganoderma	8Β,9Α-Dihydroganoderic Acid J	COX6A2	Moderate	≥0.80
Lucid ganoderma	8Β,9Α-Dihydroganoderic Acid J	CYP27A1	Moderate	≥0.80
Lucid ganoderma	8Β,9Α-Dihydroganoderic Acid J	SLC10A2	Moderate	≥0.80
Lucid ganoderma	8Β,9Α-Dihydroganoderic Acid J	SLC10A1	Moderate	≥0.80
Lucid ganoderma	8Β,9Α-Dihydroganoderic Acid J	EFTUD1	Moderate	≥0.80
Lucid ganoderma	8Β,9Α-Dihydroganoderic Acid J	SLC22A8	Moderate	≥0.80
Lucid ganoderma	8Β,9Α-Dihydroganoderic Acid J	NR1H4	Moderate	≥0.80
Lucid ganoderma	8Β,9Α-Dihydroganoderic Acid J	SLCO1B3	Moderate	≥0.80
Lucid ganoderma	8Β,9Α-Dihydroganoderic Acid J	SLC22A7	Moderate	≥0.80
Lucid ganoderma	8Β,9Α-Dihydroganoderic Acid J	SLCO1B1	Moderate	≥0.80
Lucid ganoderma	8Β,9Α-Dihydroganoderic Acid J Methyl Ester	IGHG2	Moderate	≥0.80
Lucid ganoderma	8Β,9Α-Dihydroganoderic Acid J Methyl Ester	HSD11B1	Moderate	≥0.80
Lucid ganoderma	8Β,9Α-Dihydroganoderic Acid J Methyl Ester	ABCC3	Moderate	≥0.80
Lucid ganoderma	8Β,9Α-Dihydroganoderic Acid J Methyl Ester	ABCC4	Moderate	≥0.80
Lucid ganoderma	8Β,9Α-Dihydroganoderic Acid J Methyl Ester	NR1I2	Moderate	≥0.80
Lucid ganoderma	8Β,9Α-Dihydroganoderic Acid J Methyl Ester	ABCB11	Moderate	≥0.80
Lucid ganoderma	8Β,9Α-Dihydroganoderic Acid J Methyl Ester	ADH1C	Moderate	≥0.80
Lucid ganoderma	8Β,9Α-Dihydroganoderic Acid J Methyl Ester	COX1	Moderate	≥0.80
Lucid ganoderma	8Β,9Α-Dihydroganoderic Acid J Methyl Ester	COX2	Moderate	≥0.80
Lucid ganoderma	8Β,9Α-Dihydroganoderic Acid J Methyl Ester	PLA2G1B	Moderate	≥0.80
Lucid ganoderma	8Β,9Α-Dihydroganoderic Acid J Methyl Ester	CYP2E1	Moderate	≥0.80
Lucid ganoderma	8Β,9Α-Dihydroganoderic Acid J Methyl Ester	FABP1	Moderate	≥0.80
Lucid ganoderma	8Β,9Α-Dihydroganoderic Acid J Methyl Ester	ABCB1	Moderate	≥0.80
Lucid ganoderma	8Β,9Α-Dihydroganoderic Acid J Methyl Ester	CYP3A4	Moderate	≥0.80
Lucid ganoderma	8Β,9Α-Dihydroganoderic Acid J Methyl Ester	GSTP1	Moderate	≥0.80
Lucid ganoderma	8Β,9Α-Dihydroganoderic Acid J Methyl Ester	COX6C	Moderate	≥0.80
Lucid ganoderma	8Β,9Α-Dihydroganoderic Acid J Methyl Ester	COX8A	Moderate	≥0.80
Lucid ganoderma	8Β,9Α-Dihydroganoderic Acid J Methyl Ester	COX5B	Moderate	≥0.80
Lucid ganoderma	8Β,9Α-Dihydroganoderic Acid J Methyl Ester	COX4I1	Moderate	≥0.80
Lucid ganoderma	8Β,9Α-Dihydroganoderic Acid J Methyl Ester	COX6B1	Moderate	≥0.80
Lucid ganoderma	8Β,9Α-Dihydroganoderic Acid J Methyl Ester	COX7C	Moderate	≥0.80
Lucid ganoderma	8Β,9Α-Dihydroganoderic Acid J Methyl Ester	UGT2B7	Moderate	≥0.80
Lucid ganoderma	8Β,9Α-Dihydroganoderic Acid J Methyl Ester	COX5A	Moderate	≥0.80
Lucid ganoderma	8Β,9Α-Dihydroganoderic Acid J Methyl Ester	FECH	Moderate	≥0.80
Lucid ganoderma	8Β,9Α-Dihydroganoderic Acid J Methyl Ester	CES1	Moderate	≥0.80
Lucid ganoderma	8Β,9Α-Dihydroganoderic Acid J Methyl Ester	COX7A1	Moderate	≥0.80
Lucid ganoderma	8Β,9Α-Dihydroganoderic Acid J Methyl Ester	COX7B	Moderate	≥0.80
Lucid ganoderma	8Β,9Α-Dihydroganoderic Acid J Methyl Ester	ABCC1	Moderate	≥0.80
Lucid ganoderma	8Β,9Α-Dihydroganoderic Acid J Methyl Ester	SLCO1A2	Moderate	≥0.80
Lucid ganoderma	8Β,9Α-Dihydroganoderic Acid J Methyl Ester	FABP6	Moderate	≥0.80
Lucid ganoderma	8Β,9Α-Dihydroganoderic Acid J Methyl Ester	AKR1C2	Moderate	≥0.80
Lucid ganoderma	8Β,9Α-Dihydroganoderic Acid J Methyl Ester	ESRRG	Moderate	≥0.80
Lucid ganoderma	8Β,9Α-Dihydroganoderic Acid J Methyl Ester	COX6A2	Moderate	≥0.80
Lucid ganoderma	8Β,9Α-Dihydroganoderic Acid J Methyl Ester	CYP27A1	Moderate	≥0.80
Lucid ganoderma	8Β,9Α-Dihydroganoderic Acid J Methyl Ester	SLC10A2	Moderate	≥0.80
Lucid ganoderma	8Β,9Α-Dihydroganoderic Acid J Methyl Ester	SLC10A1	Moderate	≥0.80
Lucid ganoderma	8Β,9Α-Dihydroganoderic Acid J Methyl Ester	EFTUD1	Moderate	≥0.80
Lucid ganoderma	8Β,9Α-Dihydroganoderic Acid J Methyl Ester	SLC22A8	Moderate	≥0.80
Lucid ganoderma	8Β,9Α-Dihydroganoderic Acid J Methyl Ester	ABCC2	Moderate	≥0.80
Lucid ganoderma	8Β,9Α-Dihydroganoderic Acid J Methyl Ester	NR1H4	Moderate	≥0.80
Lucid ganoderma	8Β,9Α-Dihydroganoderic Acid J Methyl Ester	SLCO1B3	Moderate	≥0.80
Lucid ganoderma	8Β,9Α-Dihydroganoderic Acid J Methyl Ester	SLC22A7	Moderate	≥0.80
Lucid ganoderma	8Β,9Α-Dihydroganoderic Acid J Methyl Ester	SLCO1B1	Moderate	≥0.80
Lucid ganoderma	26,27-Dihydroxy-Lanosta-7,9(11),24-Trien-3,16-Dione	GLRA3	Moderate	≥0.80
Lucid ganoderma	26,27-Dihydroxy-Lanosta-7,9(11),24-Trien-3,16-Dione	ABCB1	Moderate	≥0.80
Lucid ganoderma	26,27-Dihydroxy-Lanosta-7,9(11),24-Trien-3,16-Dione	CYP3A4	Moderate	≥0.80
Lucid ganoderma	26,27-Dihydroxy-Lanosta-7,9(11),24-Trien-3,16-Dione	GABRB3	Moderate	≥0.80
Lucid ganoderma	26,27-Dihydroxy-Lanosta-7,9(11),24-Trien-3,16-Dione	ABCC1	Moderate	≥0.80
Lucid ganoderma	26,27-Dihydroxy-Lanosta-7,9(11),24-Trien-3,16-Dione	ABCC2	Moderate	≥0.80
Lucid ganoderma	26,27-Dihydroxy-Lanosta-7,9(11),24-Trien-3,16-Dione	ABCG2	Moderate	≥0.80
Lucid ganoderma	26,27-Dihydroxy-Lanosta-7,9(11),24-Trien-3,16-Dione	NR1I2	Moderate	≥0.80
Lucid ganoderma	26,27-Dihydroxy-Lanosta-7,9(11),24-Trien-3,16-Dione	ALOX5	Moderate	≥0.80
Lucid ganoderma	26,27-Dihydroxy-Lanosta-7,9(11),24-Trien-3,16-Dione	PTGS1	Moderate	≥0.80
Lucid ganoderma	26,27-Dihydroxy-Lanosta-7,9(11),24-Trien-3,16-Dione	SLCO1B1	Moderate	≥0.80
Lucid ganoderma	26,27-Dihydroxy-Lanosta-7,9(11),24-Trien-3,16-Dione	NR3C1	Moderate	≥0.80
Lucid ganoderma	26,27-Dihydroxy-Lanosta-7,9(11),24-Trien-3,16-Dione	SERPINA6	Moderate	≥0.80
Lucid ganoderma	26,27-Dihydroxy-Lanosta-7,9(11),24-Trien-3,16-Dione	BCHE	Moderate	≥0.80
Lucid ganoderma	26,27-Dihydroxy-Lanosta-7,9(11),24-Trien-3,16-Dione	PTGS2	Moderate	≥0.80
Lucid ganoderma	26,27-Dihydroxy-Lanosta-7,9(11),24-Trien-3,16-Dione	SLC22A5	Moderate	≥0.80
Lucid ganoderma	26,27-Dihydroxy-Lanosta-7,9(11),24-Trien-3,16-Dione	CYP17A1	Moderate	≥0.80
Lucid ganoderma	26,27-Dihydroxy-Lanosta-7,9(11),24-Trien-3,16-Dione	NR3C2	Moderate	≥0.80
Lucid ganoderma	26,27-Dihydroxy-Lanosta-7,9(11),24-Trien-3,16-Dione	CYP11B1	Moderate	≥0.80
Lucid ganoderma	26,27-Dihydroxy-Lanosta-7,9(11),24-Trien-3,16-Dione	CYP11B2	Moderate	≥0.80
Lucid ganoderma	26,27-Dihydroxy-Lanosta-7,9(11),24-Trien-3,16-Dione	SLCO1A2	Moderate	≥0.80
Lucid ganoderma	26,27-Dihydroxy-Lanosta-7,9(11),24-Trien-3,16-Dione	AR	Moderate	≥0.80
Lucid ganoderma	26,27-Dihydroxy-Lanosta-7,9(11),24-Trien-3,16-Dione	HSD11B2	Moderate	≥0.80
Lucid ganoderma	26,27-Dihydroxy-Lanosta-7,9(11),24-Trien-3,16-Dione	HSD11B1	Moderate	≥0.80
Lucid ganoderma	26,27-Dihydroxy-Lanosta-7,9(11),24-Trien-3,16-Dione	NCOA1	Moderate	≥0.80
Lucid ganoderma	26,27-Dihydroxy-Lanosta-7,9(11),24-Trien-3,16-Dione	ABCB11	Moderate	≥0.80
Lucid ganoderma	26,27-Dihydroxy-Lanosta-7,9(11),24-Trien-3,16-Dione	ANXA1	Moderate	≥0.80
Lucid ganoderma	26,27-Dihydroxy-Lanosta-7,9(11),24-Trien-3,16-Dione	CYP1A1	Moderate	≥0.80
Lucid ganoderma	26,27-Dihydroxy-Lanosta-7,9(11),24-Trien-3,16-Dione	CYP11A1	Moderate	≥0.80
Lucid ganoderma	26,27-Dihydroxy-Lanosta-7,9(11),24-Trien-3,16-Dione	CYP2E1	Moderate	≥0.80
Lucid ganoderma	26,27-Dihydroxy-Lanosta-7,9(11),24-Trien-3,16-Dione	CYP2C8	Moderate	≥0.80
Lucid ganoderma	26,27-Dihydroxy-Lanosta-7,9(11),24-Trien-3,16-Dione	CYP2D6	Moderate	≥0.80
Lucid ganoderma	26,27-Dihydroxy-Lanosta-7,9(11),24-Trien-3,16-Dione	CYP2A6	Moderate	≥0.80
Lucid ganoderma	26,27-Dihydroxy-Lanosta-7,9(11),24-Trien-3,16-Dione	CYP19A1	Moderate	≥0.80
Lucid ganoderma	26,27-Dihydroxy-Lanosta-7,9(11),24-Trien-3,16-Dione	CYP2C9	Moderate	≥0.80
Lucid ganoderma	26,27-Dihydroxy-Lanosta-7,9(11),24-Trien-3,16-Dione	CYP2B6	Moderate	≥0.80
Lucid ganoderma	26,27-Dihydroxy-Lanosta-7,9(11),24-Trien-3,16-Dione	CYP3A5	Moderate	≥0.80
Lucid ganoderma	26,27-Dihydroxy-Lanosta-7,9(11),24-Trien-3,16-Dione	CYP3A7	Moderate	≥0.80
Lucid ganoderma	26,27-Dihydroxy-Lanosta-7,9(11),24-Trien-3,16-Dione	CYP2C19	Moderate	≥0.80
Lucid ganoderma	26,27-Dihydroxy-Lanosta-7,9(11),24-Trien-3,16-Dione	NOS2A	Moderate	≥0.80
Lucid ganoderma	26,27-Dihydroxy-Lanosta-7,9(11),24-Trien-3,16-Dione	NR0B1	Moderate	≥0.80
Lucid ganoderma	26,27-Dihydroxy-Lanosta-7,9(11),24-Trien-3,16-Dione	CYP4A11	Moderate	≥0.80
Lucid ganoderma	26,27-Dihydroxy-Lanosta-7,9(11),24-Trien-3,16-Dione	CYP1B1	Moderate	≥0.80
Lucid ganoderma	26,27-Dihydroxy-Lanosta-7,9(11),24-Trien-3,16-Dione	CYP3A43	Moderate	≥0.80
Lucid ganoderma	26,27-Dihydroxy-Lanosta-7,9(11),24-Trien-3,16-Dione	VDR	Moderate	≥0.80
Lucid ganoderma	26,27-Dihydroxy-Lanosta-7,9(11),24-Trien-3,16-Dione	ALB	Moderate	≥0.80
Lucid ganoderma	26,27-Dihydroxy-Lanosta-7,9(11),24-Trien-3,16-Dione	SHBG	Moderate	≥0.80
Lucid ganoderma	26,27-Dihydroxy-Lanosta-7,9(11),24-Trien-3,16-Dione	HSD3B1	Moderate	≥0.80
Lucid ganoderma	Ganode-8-En-Ric Acid A	NR3C1	Moderate	≥0.80
Lucid ganoderma	Ganode-8-En-Ric Acid A	SLC22A5	Moderate	≥0.80
Lucid ganoderma	Ganode-8-En-Ric Acid A	ESR1	Moderate	≥0.80
Lucid ganoderma	Ganode-8-En-Ric Acid A	SHBG	Moderate	≥0.80
Lucid ganoderma	Ganode-8-En-Ric Acid A	CYP17A1	Moderate	≥0.80
Lucid ganoderma	Ganode-8-En-Ric Acid A	ABCB1	Moderate	≥0.80
Lucid ganoderma	Ganode-8-En-Ric Acid A	NR3C2	Moderate	≥0.80
Lucid ganoderma	Ganode-8-En-Ric Acid A	AR	Moderate	≥0.80
Lucid ganoderma	Ganode-8-En-Ric Acid A	CYP11B1	Moderate	≥0.80
Lucid ganoderma	Ganode-8-En-Ric Acid A	PRLR	Moderate	≥0.80
Lucid ganoderma	Ganode-8-En-Ric Acid A	CYP11B2	Moderate	≥0.80
Lucid ganoderma	Ganode-8-En-Ric Acid A	SLCO1A2	Moderate	≥0.80
Lucid ganoderma	Ganode-8-En-Ric Acid A	HSD11B2	Moderate	≥0.80
Lucid ganoderma	Ganode-8-En-Ric Acid A	SULT2B1	Moderate	≥0.80
Lucid ganoderma	Ganode-8-En-Ric Acid A	SLC22A1	Moderate	≥0.80
Lucid ganoderma	Ganode-8-En-Ric Acid A	NR1I2	Moderate	≥0.80
Lucid ganoderma	Ganode-8-En-Ric Acid A	SLC22A3	Moderate	≥0.80
Lucid ganoderma	Ganode-8-En-Ric Acid A	ALB	Moderate	≥0.80
Lucid ganoderma	Ganode-8-En-Ric Acid A	CYP1A1	Moderate	≥0.80
Lucid ganoderma	Ganode-8-En-Ric Acid A	CYP11A1	Moderate	≥0.80
Lucid ganoderma	Ganode-8-En-Ric Acid A	PGR	Moderate	≥0.80
Lucid ganoderma	Ganode-8-En-Ric Acid A	CYP3A4	Moderate	≥0.80
Lucid ganoderma	Ganode-8-En-Ric Acid A	CYP2C8	Moderate	≥0.80
Lucid ganoderma	Ganode-8-En-Ric Acid A	VDR	Moderate	≥0.80
Lucid ganoderma	Ganode-8-En-Ric Acid A	CYP19A1	Moderate	≥0.80
Lucid ganoderma	Ganode-8-En-Ric Acid A	CYP2C9	Moderate	≥0.80
Lucid ganoderma	Ganode-8-En-Ric Acid A	CYP2B6	Moderate	≥0.80
Lucid ganoderma	Ganode-8-En-Ric Acid A	CYP3A5	Moderate	≥0.80
Lucid ganoderma	Ganode-8-En-Ric Acid A	MAOA	Moderate	≥0.80
Lucid ganoderma	Ganode-8-En-Ric Acid A	CYP3A7	Moderate	≥0.80
Lucid ganoderma	Ganode-8-En-Ric Acid A	CYP2C19	Moderate	≥0.80
Lucid ganoderma	Ganode-8-En-Ric Acid A	RORA	Moderate	≥0.80
Lucid ganoderma	Ganode-8-En-Ric Acid A	AKR1C2	Moderate	≥0.80
Lucid ganoderma	Ganode-8-En-Ric Acid A	AKR1C1	Moderate	≥0.80
Lucid ganoderma	Ganode-8-En-Ric Acid A	SLC10A1	Moderate	≥0.80
Lucid ganoderma	Ganode-8-En-Ric Acid A	NR1I3	Moderate	≥0.80
Lucid ganoderma	Ganode-8-En-Ric Acid A	NCOA2	Moderate	≥0.80
Lucid ganoderma	Ganode-8-En-Ric Acid A	CYP1B1	Moderate	≥0.80
Lucid ganoderma	Ganode-8-En-Ric Acid A	CYP2A13	Moderate	≥0.80
Lucid ganoderma	Ganode-8-En-Ric Acid A	SLC10A6	Moderate	≥0.80
Lucid ganoderma	Ganode-8-En-Ric Acid A	SLC22A8	Moderate	≥0.80
Lucid ganoderma	Ganode-8-En-Ric Acid A	SLC22A4	Moderate	≥0.80
Lucid ganoderma	Ganode-8-En-Ric Acid A	CYP3A43	Moderate	≥0.80
Lucid ganoderma	Ganode-8-En-Ric Acid A	CLEC4E	Moderate	≥0.80
Lucid ganoderma	Ganode-8-En-Ric Acid A	ABCG2	Moderate	≥0.80
Lucid ganoderma	Ganode-8-En-Ric Acid A	SLC22A7	Moderate	≥0.80
Lucid ganoderma	Ganode-8-En-Ric Acid A	HMGCR	Moderate	≥0.80
Lucid ganoderma	Ganode-8-En-Ric Acid A	ANXA1	Moderate	≥0.80
Lucid ganoderma	Ganode-8-En-Ric Acid A	ITGB2	Moderate	≥0.80
Lucid ganoderma	Ganode-8-En-Ric Acid A	SERPINA6	Moderate	≥0.80
Lucid ganoderma	Ganode-8-En-Ric Acid A	CYP2D6	Moderate	≥0.80
Lucid ganoderma	Ganode-8-En-Ric Acid A	CYP2A6	Moderate	≥0.80
Lucid ganoderma	Ganode-8-En-Ric Acid A	HSD3B1	Moderate	≥0.80
Lucid ganoderma	Ganode-8-En-Ric Acid A	UGT2B7	Moderate	≥0.80
Lucid ganoderma	Ganode-8-En-Ric Acid A	ITGAL	Moderate	≥0.80
Lucid ganoderma	Ganode-8-En-Ric Acid A	UGT1A1	Moderate	≥0.80
Lucid ganoderma	Ganode-8-En-Ric Acid A	HSD11B1	Moderate	≥0.80
Lucid ganoderma	Ganode-8-En-Ric Acid A	UGT1A3	Moderate	≥0.80
Lucid ganoderma	Ganode-8-En-Ric Acid A	ABCC2	Moderate	≥0.80
Lucid ganoderma	Ganode-8-En-Ric Acid A	SLCO1B1	Moderate	≥0.80
Lucid ganoderma	Ganode-8-En-Ric Acid A	IGHG2	Moderate	≥0.80
Lucid ganoderma	Ganode-8-En-Ric Acid A	GC	Moderate	≥0.80
Lucid ganoderma	Ganode-8-En-Ric Acid A	HOXA10	Moderate	≥0.80
Lucid ganoderma	Ganode-8-En-Ric Acid A	CYP24A1	Moderate	≥0.80
Lucid ganoderma	Ganode-8-En-Ric Acid A	SLCO2B1	Moderate	≥0.80
Lucid ganoderma	Ganode-8-En-Ric Acid A	ABCB11	Moderate	≥0.80
Lucid ganoderma	Ganode-8-En-Ric Acid A	CES1	Moderate	≥0.80
Lucid ganoderma	Ganode-8-En-Ric Acid A	SLC16A1	Moderate	≥0.80
Lucid ganoderma	Ganode-8-En-Ric Acid A	NCOA1	Moderate	≥0.80
Lucid ganoderma	Ganode-8-En-Ric Acid A	SLC22A6	Moderate	≥0.80
Lucid ganoderma	Ganode-8-En-Ric Acid A	SLCO1B3	Moderate	≥0.80
Lucid ganoderma	Ganode-8-En-Ric Acid A	SLC22A11	Moderate	≥0.80
Lucid ganoderma	Ganode-8-En-Ric Acid A	LSS	Moderate	≥0.80
Lucid ganoderma	Ganode-8-En-Ric Acid A	CYP27B1	Moderate	≥0.80
Lucid ganoderma	Ganode-8-En-Ric Acid A	ALOX5	Moderate	≥0.80
Lucid ganoderma	Ganode-8-En-Ric Acid A	PTGS1	Moderate	≥0.80
Lucid ganoderma	Ganode-8-En-Ric Acid A	NR1H4	Moderate	≥0.80
Lucid ganoderma	Ganode-8-En-Ric Acid A	ABCC3	Moderate	≥0.80
Lucid ganoderma	Ganode-8-En-Ric Acid A	ABCC4	Moderate	≥0.80
Lucid ganoderma	Ganode-8-En-Ric Acid A	ADH1C	Moderate	≥0.80
Lucid ganoderma	Ganode-8-En-Ric Acid A	COX1	Moderate	≥0.80
Lucid ganoderma	Ganode-8-En-Ric Acid A	COX2	Moderate	≥0.80
Lucid ganoderma	Ganode-8-En-Ric Acid A	PLA2G1B	Moderate	≥0.80
Lucid ganoderma	Ganode-8-En-Ric Acid A	CYP2E1	Moderate	≥0.80
Lucid ganoderma	Ganode-8-En-Ric Acid A	FABP1	Moderate	≥0.80
Lucid ganoderma	Ganode-8-En-Ric Acid A	GSTP1	Moderate	≥0.80
Lucid ganoderma	Ganode-8-En-Ric Acid A	COX6C	Moderate	≥0.80
Lucid ganoderma	Ganode-8-En-Ric Acid A	COX8A	Moderate	≥0.80
Lucid ganoderma	Ganode-8-En-Ric Acid A	COX5B	Moderate	≥0.80
Lucid ganoderma	Ganode-8-En-Ric Acid A	COX4I1	Moderate	≥0.80
Lucid ganoderma	Ganode-8-En-Ric Acid A	COX6B1	Moderate	≥0.80
Lucid ganoderma	Ganode-8-En-Ric Acid A	COX7C	Moderate	≥0.80
Lucid ganoderma	Ganode-8-En-Ric Acid A	COX5A	Moderate	≥0.80
Lucid ganoderma	Ganode-8-En-Ric Acid A	FECH	Moderate	≥0.80
Lucid ganoderma	Ganode-8-En-Ric Acid A	COX7A1	Moderate	≥0.80
Lucid ganoderma	Ganode-8-En-Ric Acid A	COX7B	Moderate	≥0.80
Lucid ganoderma	Ganode-8-En-Ric Acid A	ABCC1	Moderate	≥0.80
Lucid ganoderma	Ganode-8-En-Ric Acid A	FABP6	Moderate	≥0.80
Lucid ganoderma	Ganode-8-En-Ric Acid A	ESRRG	Moderate	≥0.80
Lucid ganoderma	Ganode-8-En-Ric Acid A	COX6A2	Moderate	≥0.80
Lucid ganoderma	Ganode-8-En-Ric Acid A	CYP27A1	Moderate	≥0.80
Lucid ganoderma	Ganode-8-En-Ric Acid A	SLC10A2	Moderate	≥0.80
Lucid ganoderma	Ganode-8-En-Ric Acid A	EFTUD1	Moderate	≥0.80
Lucid ganoderma	Ganode-8-En-Ric Acid B	NR3C1	Moderate	≥0.80
Lucid ganoderma	Ganode-8-En-Ric Acid B	SLC22A5	Moderate	≥0.80
Lucid ganoderma	Ganode-8-En-Ric Acid B	ESR1	Moderate	≥0.80
Lucid ganoderma	Ganode-8-En-Ric Acid B	SHBG	Moderate	≥0.80
Lucid ganoderma	Ganode-8-En-Ric Acid B	CYP17A1	Moderate	≥0.80
Lucid ganoderma	Ganode-8-En-Ric Acid B	ABCB1	Moderate	≥0.80
Lucid ganoderma	Ganode-8-En-Ric Acid B	NR3C2	Moderate	≥0.80
Lucid ganoderma	Ganode-8-En-Ric Acid B	AR	Moderate	≥0.80
Lucid ganoderma	Ganode-8-En-Ric Acid B	CYP11B1	Moderate	≥0.80
Lucid ganoderma	Ganode-8-En-Ric Acid B	PRLR	Moderate	≥0.80
Lucid ganoderma	Ganode-8-En-Ric Acid B	CYP11B2	Moderate	≥0.80
Lucid ganoderma	Ganode-8-En-Ric Acid B	SLCO1A2	Moderate	≥0.80
Lucid ganoderma	Ganode-8-En-Ric Acid B	HSD11B2	Moderate	≥0.80
Lucid ganoderma	Ganode-8-En-Ric Acid B	SULT2B1	Moderate	≥0.80
Lucid ganoderma	Ganode-8-En-Ric Acid B	SLC22A1	Moderate	≥0.80
Lucid ganoderma	Ganode-8-En-Ric Acid B	NR1I2	Moderate	≥0.80
Lucid ganoderma	Ganode-8-En-Ric Acid B	SLC22A3	Moderate	≥0.80
Lucid ganoderma	Ganode-8-En-Ric Acid B	ALB	Moderate	≥0.80
Lucid ganoderma	Ganode-8-En-Ric Acid B	CYP1A1	Moderate	≥0.80
Lucid ganoderma	Ganode-8-En-Ric Acid B	CYP11A1	Moderate	≥0.80
Lucid ganoderma	Ganode-8-En-Ric Acid B	PGR	Moderate	≥0.80
Lucid ganoderma	Ganode-8-En-Ric Acid B	CYP3A4	Moderate	≥0.80
Lucid ganoderma	Ganode-8-En-Ric Acid B	CYP2C8	Moderate	≥0.80
Lucid ganoderma	Ganode-8-En-Ric Acid B	VDR	Moderate	≥0.80
Lucid ganoderma	Ganode-8-En-Ric Acid B	CYP19A1	Moderate	≥0.80
Lucid ganoderma	Ganode-8-En-Ric Acid B	CYP2C9	Moderate	≥0.80
Lucid ganoderma	Ganode-8-En-Ric Acid B	CYP2B6	Moderate	≥0.80
Lucid ganoderma	Ganode-8-En-Ric Acid B	CYP3A5	Moderate	≥0.80
Lucid ganoderma	Ganode-8-En-Ric Acid B	MAOA	Moderate	≥0.80
Lucid ganoderma	Ganode-8-En-Ric Acid B	CYP3A7	Moderate	≥0.80
Lucid ganoderma	Ganode-8-En-Ric Acid B	CYP2C19	Moderate	≥0.80
Lucid ganoderma	Ganode-8-En-Ric Acid B	RORA	Moderate	≥0.80
Lucid ganoderma	Ganode-8-En-Ric Acid B	AKR1C2	Moderate	≥0.80
Lucid ganoderma	Ganode-8-En-Ric Acid B	AKR1C1	Moderate	≥0.80
Lucid ganoderma	Ganode-8-En-Ric Acid B	SLC10A1	Moderate	≥0.80
Lucid ganoderma	Ganode-8-En-Ric Acid B	NR1I3	Moderate	≥0.80
Lucid ganoderma	Ganode-8-En-Ric Acid B	NCOA2	Moderate	≥0.80
Lucid ganoderma	Ganode-8-En-Ric Acid B	CYP1B1	Moderate	≥0.80
Lucid ganoderma	Ganode-8-En-Ric Acid B	CYP2A13	Moderate	≥0.80
Lucid ganoderma	Ganode-8-En-Ric Acid B	SLC10A6	Moderate	≥0.80
Lucid ganoderma	Ganode-8-En-Ric Acid B	SLC22A8	Moderate	≥0.80
Lucid ganoderma	Ganode-8-En-Ric Acid B	SLC22A4	Moderate	≥0.80
Lucid ganoderma	Ganode-8-En-Ric Acid B	CYP3A43	Moderate	≥0.80
Lucid ganoderma	Ganode-8-En-Ric Acid B	CLEC4E	Moderate	≥0.80
Lucid ganoderma	Ganode-8-En-Ric Acid B	ABCG2	Moderate	≥0.80
Lucid ganoderma	Ganode-8-En-Ric Acid B	SLC22A7	Moderate	≥0.80
Lucid ganoderma	Ganode-8-En-Ric Acid B	HMGCR	Moderate	≥0.80
Lucid ganoderma	Ganode-8-En-Ric Acid B	ANXA1	Moderate	≥0.80
Lucid ganoderma	Ganode-8-En-Ric Acid B	ITGB2	Moderate	≥0.80
Lucid ganoderma	Ganode-8-En-Ric Acid B	SERPINA6	Moderate	≥0.80
Lucid ganoderma	Ganode-8-En-Ric Acid B	CYP2D6	Moderate	≥0.80
Lucid ganoderma	Ganode-8-En-Ric Acid B	CYP2A6	Moderate	≥0.80
Lucid ganoderma	Ganode-8-En-Ric Acid B	HSD3B1	Moderate	≥0.80
Lucid ganoderma	Ganode-8-En-Ric Acid B	UGT2B7	Moderate	≥0.80
Lucid ganoderma	Ganode-8-En-Ric Acid B	ITGAL	Moderate	≥0.80
Lucid ganoderma	Ganode-8-En-Ric Acid B	UGT1A1	Moderate	≥0.80
Lucid ganoderma	Ganode-8-En-Ric Acid B	HSD11B1	Moderate	≥0.80
Lucid ganoderma	Ganode-8-En-Ric Acid B	UGT1A3	Moderate	≥0.80
Lucid ganoderma	Ganode-8-En-Ric Acid B	ABCC2	Moderate	≥0.80
Lucid ganoderma	Ganode-8-En-Ric Acid B	SLCO1B1	Moderate	≥0.80
Lucid ganoderma	Ganode-8-En-Ric Acid B	IGHG2	Moderate	≥0.80
Lucid ganoderma	Ganode-8-En-Ric Acid B	GC	Moderate	≥0.80
Lucid ganoderma	Ganode-8-En-Ric Acid B	HOXA10	Moderate	≥0.80
Lucid ganoderma	Ganode-8-En-Ric Acid B	CYP24A1	Moderate	≥0.80
Lucid ganoderma	Ganode-8-En-Ric Acid B	SLCO2B1	Moderate	≥0.80
Lucid ganoderma	Ganode-8-En-Ric Acid B	ABCB11	Moderate	≥0.80
Lucid ganoderma	Ganode-8-En-Ric Acid B	CES1	Moderate	≥0.80
Lucid ganoderma	Ganode-8-En-Ric Acid B	SLC16A1	Moderate	≥0.80
Lucid ganoderma	Ganode-8-En-Ric Acid B	NCOA1	Moderate	≥0.80
Lucid ganoderma	Ganode-8-En-Ric Acid B	SLC22A6	Moderate	≥0.80
Lucid ganoderma	Ganode-8-En-Ric Acid B	SLCO1B3	Moderate	≥0.80
Lucid ganoderma	Ganode-8-En-Ric Acid B	SLC22A11	Moderate	≥0.80
Lucid ganoderma	Ganode-8-En-Ric Acid B	LSS	Moderate	≥0.80
Lucid ganoderma	Ganode-8-En-Ric Acid B	CYP27B1	Moderate	≥0.80
Lucid ganoderma	Ganode-8-En-Ric Acid B	ALOX5	Moderate	≥0.80
Lucid ganoderma	Ganode-8-En-Ric Acid B	PTGS1	Moderate	≥0.80
Lucid ganoderma	Ganode-8-En-Ric Acid B	NR1H4	Moderate	≥0.80
Lucid ganoderma	Ganode-8-En-Ric Acid B	ABCC3	Moderate	≥0.80
Lucid ganoderma	Ganode-8-En-Ric Acid B	ABCC4	Moderate	≥0.80
Lucid ganoderma	Ganode-8-En-Ric Acid B	ADH1C	Moderate	≥0.80
Lucid ganoderma	Ganode-8-En-Ric Acid B	COX1	Moderate	≥0.80
Lucid ganoderma	Ganode-8-En-Ric Acid B	COX2	Moderate	≥0.80
Lucid ganoderma	Ganode-8-En-Ric Acid B	PLA2G1B	Moderate	≥0.80
Lucid ganoderma	Ganode-8-En-Ric Acid B	CYP2E1	Moderate	≥0.80
Lucid ganoderma	Ganode-8-En-Ric Acid B	FABP1	Moderate	≥0.80
Lucid ganoderma	Ganode-8-En-Ric Acid B	GSTP1	Moderate	≥0.80
Lucid ganoderma	Ganode-8-En-Ric Acid B	COX6C	Moderate	≥0.80
Lucid ganoderma	Ganode-8-En-Ric Acid B	COX8A	Moderate	≥0.80
Lucid ganoderma	Ganode-8-En-Ric Acid B	COX5B	Moderate	≥0.80
Lucid ganoderma	Ganode-8-En-Ric Acid B	COX4I1	Moderate	≥0.80
Lucid ganoderma	Ganode-8-En-Ric Acid B	COX6B1	Moderate	≥0.80
Lucid ganoderma	Ganode-8-En-Ric Acid B	COX7C	Moderate	≥0.80
Lucid ganoderma	Ganode-8-En-Ric Acid B	COX5A	Moderate	≥0.80
Lucid ganoderma	Ganode-8-En-Ric Acid B	FECH	Moderate	≥0.80
Lucid ganoderma	Ganode-8-En-Ric Acid B	COX7A1	Moderate	≥0.80
Lucid ganoderma	Ganode-8-En-Ric Acid B	COX7B	Moderate	≥0.80
Lucid ganoderma	Ganode-8-En-Ric Acid B	ABCC1	Moderate	≥0.80
Lucid ganoderma	Ganode-8-En-Ric Acid B	FABP6	Moderate	≥0.80
Lucid ganoderma	Ganode-8-En-Ric Acid B	ESRRG	Moderate	≥0.80
Lucid ganoderma	Ganode-8-En-Ric Acid B	COX6A2	Moderate	≥0.80
Lucid ganoderma	Ganode-8-En-Ric Acid B	CYP27A1	Moderate	≥0.80
Lucid ganoderma	Ganode-8-En-Ric Acid B	SLC10A2	Moderate	≥0.80
Lucid ganoderma	Ganode-8-En-Ric Acid B	EFTUD1	Moderate	≥0.80
Lucid ganoderma	Ganode-8-En-Ric Acid C1	SLCO2B1	Moderate	≥0.80
Lucid ganoderma	Ganode-8-En-Ric Acid C1	ABCB11	Moderate	≥0.80
Lucid ganoderma	Ganode-8-En-Ric Acid C1	HMGCR	Moderate	≥0.80
Lucid ganoderma	Ganode-8-En-Ric Acid C1	ABCB1	Moderate	≥0.80
Lucid ganoderma	Ganode-8-En-Ric Acid C1	NR3C2	Moderate	≥0.80
Lucid ganoderma	Ganode-8-En-Ric Acid C1	CYP3A4	Moderate	≥0.80
Lucid ganoderma	Ganode-8-En-Ric Acid C1	CYP2C8	Moderate	≥0.80
Lucid ganoderma	Ganode-8-En-Ric Acid C1	CYP2D6	Moderate	≥0.80
Lucid ganoderma	Ganode-8-En-Ric Acid C1	CYP2C9	Moderate	≥0.80
Lucid ganoderma	Ganode-8-En-Ric Acid C1	CYP3A5	Moderate	≥0.80
Lucid ganoderma	Ganode-8-En-Ric Acid C1	CES1	Moderate	≥0.80
Lucid ganoderma	Ganode-8-En-Ric Acid C1	HSD11B1	Moderate	≥0.80
Lucid ganoderma	Ganode-8-En-Ric Acid C1	SLCO1A2	Moderate	≥0.80
Lucid ganoderma	Ganode-8-En-Ric Acid C1	SLC16A1	Moderate	≥0.80
Lucid ganoderma	Ganode-8-En-Ric Acid C1	NCOA1	Moderate	≥0.80
Lucid ganoderma	Ganode-8-En-Ric Acid C1	SLC22A6	Moderate	≥0.80
Lucid ganoderma	Ganode-8-En-Ric Acid C1	SLC22A8	Moderate	≥0.80
Lucid ganoderma	Ganode-8-En-Ric Acid C1	ABCC2	Moderate	≥0.80
Lucid ganoderma	Ganode-8-En-Ric Acid C1	SLCO1B3	Moderate	≥0.80
Lucid ganoderma	Ganode-8-En-Ric Acid C1	SLC22A11	Moderate	≥0.80
Lucid ganoderma	Ganode-8-En-Ric Acid C1	ABCG2	Moderate	≥0.80
Lucid ganoderma	Ganode-8-En-Ric Acid C1	SLC22A7	Moderate	≥0.80
Lucid ganoderma	Ganode-8-En-Ric Acid C1	SLCO1B1	Moderate	≥0.80
Lucid ganoderma	Ganode-8-En-Ric Acid C1	SULT2B1	Moderate	≥0.80
Lucid ganoderma	Ganode-8-En-Ric Acid C1	GABRP	Moderate	≥0.80
Lucid ganoderma	Ganode-8-En-Ric Acid C1	GABRD	Moderate	≥0.80
Lucid ganoderma	Ganode-8-En-Ric Acid C1	GRIN2D	Moderate	≥0.80
Lucid ganoderma	Ganode-8-En-Ric Acid C1	GRIN3B	Moderate	≥0.80
Lucid ganoderma	Ganode-8-En-Ric Acid C1	NR1I2	Moderate	≥0.80
Lucid ganoderma	Ganode-8-En-Ric Acid C1	ESR1	Moderate	≥0.80
Lucid ganoderma	Ganode-8-En-Ric Acid C1	AR	Moderate	≥0.80
Lucid ganoderma	Ganode-8-En-Ric Acid C1	HSD17B1	Moderate	≥0.80
Lucid ganoderma	Ganode-8-En-Ric Acid C1	GABRA1	Moderate	≥0.80
Lucid ganoderma	Ganode-8-En-Ric Acid C1	GABRB1	Moderate	≥0.80
Lucid ganoderma	Ganode-8-En-Ric Acid C1	GABRG2	Moderate	≥0.80
Lucid ganoderma	Ganode-8-En-Ric Acid C1	CYP3A7	Moderate	≥0.80
Lucid ganoderma	Ganode-8-En-Ric Acid C1	GABRB3	Moderate	≥0.80
Lucid ganoderma	Ganode-8-En-Ric Acid C1	GABRA5	Moderate	≥0.80
Lucid ganoderma	Ganode-8-En-Ric Acid C1	GABRA3	Moderate	≥0.80
Lucid ganoderma	Ganode-8-En-Ric Acid C1	GABRA2	Moderate	≥0.80
Lucid ganoderma	Ganode-8-En-Ric Acid C1	GABRB2	Moderate	≥0.80
Lucid ganoderma	Ganode-8-En-Ric Acid C1	GABRA4	Moderate	≥0.80
Lucid ganoderma	Ganode-8-En-Ric Acid C1	GABRE	Moderate	≥0.80
Lucid ganoderma	Ganode-8-En-Ric Acid C1	GRIN1	Moderate	≥0.80
Lucid ganoderma	Ganode-8-En-Ric Acid C1	SULT2A1	Moderate	≥0.80
Lucid ganoderma	Ganode-8-En-Ric Acid C1	PPARA	Moderate	≥0.80
Lucid ganoderma	Ganode-8-En-Ric Acid C1	GRIN2A	Moderate	≥0.80
Lucid ganoderma	Ganode-8-En-Ric Acid C1	GRIN2B	Moderate	≥0.80
Lucid ganoderma	Ganode-8-En-Ric Acid C1	GRIN2C	Moderate	≥0.80
Lucid ganoderma	Ganode-8-En-Ric Acid C1	NR1I3	Moderate	≥0.80
Lucid ganoderma	Ganode-8-En-Ric Acid C1	GABRA6	Moderate	≥0.80
Lucid ganoderma	Ganode-8-En-Ric Acid C1	GABRG1	Moderate	≥0.80
Lucid ganoderma	Ganode-8-En-Ric Acid C1	GRIN3A	Moderate	≥0.80
Lucid ganoderma	Ganode-8-En-Ric Acid C1	ESR2	Moderate	≥0.80
Lucid ganoderma	Ganode-8-En-Ric Acid C1	SIGMAR1	Moderate	≥0.80
Lucid ganoderma	Ganode-8-En-Ric Acid C1	GABRG3	Moderate	≥0.80
Lucid ganoderma	Ganode-8-En-Ric Acid C1	GABRQ	Moderate	≥0.80
Lucid ganoderma	Ganode-8-En-Ric Acid C1	NR3C1	Moderate	≥0.80
Lucid ganoderma	Ganode-8-En-Ric Acid C1	SERPINA6	Moderate	≥0.80
Lucid ganoderma	Ganode-8-En-Ric Acid C1	ALB	Moderate	≥0.80
Lucid ganoderma	Ganode-8-En-Ric Acid C1	SHBG	Moderate	≥0.80
Lucid ganoderma	Ganode-8-En-Ric Acid C1	CYP19A1	Moderate	≥0.80
Lucid ganoderma	Ganode-8-En-Ric Acid C1	CYP2B6	Moderate	≥0.80
Lucid ganoderma	Ganode-8-En-Ric Acid C1	LSS	Moderate	≥0.80
Lucid ganoderma	Ganode-8-En-Ric Acid C1	PGR	Moderate	≥0.80
Lucid ganoderma	Ganode-8-En-Ric Acid C1	CYP27B1	Moderate	≥0.80
Lucid ganoderma	Ganode-8-En-Ric Acid C1	ALOX5	Moderate	≥0.80
Lucid ganoderma	Ganode-8-En-Ric Acid C1	VDR	Moderate	≥0.80
Lucid ganoderma	Ganode-8-En-Ric Acid C1	SRD5A1	Moderate	≥0.80
Lucid ganoderma	Ganode-8-En-Ric Acid C1	COMT	Moderate	≥0.80
Lucid ganoderma	Ganode-8-En-Ric Acid C1	UGT1A1	Moderate	≥0.80
Lucid ganoderma	Ganode-8-En-Ric Acid C1	PTGS1	Moderate	≥0.80
Lucid ganoderma	Ganode-8-En-Ric Acid C1	HSD3B2	Moderate	≥0.80
Lucid ganoderma	Ganode-8-En-Ric Acid C1	SRD5A2	Moderate	≥0.80
Lucid ganoderma	Ganode-8-En-Ric Acid C1	CYP24A1	Moderate	≥0.80
Lucid ganoderma	Ganode-8-En-Ric Acid C1	SRD5A3	Moderate	≥0.80
Lucid ganoderma	Ganode-8-En-Ric Acid C1	NR1H4	Moderate	≥0.80
Lucid ganoderma	Ganode-8-En-Ric Acid C1	RORA	Moderate	≥0.80
Lucid ganoderma	Ganode-8-En-Ric Acid C1	SLC10A6	Moderate	≥0.80
Lucid ganoderma	Ganode-8-En-Ric Acid C1	CLEC4E	Moderate	≥0.80
Lucid ganoderma	Ganode-8-En-Ric Acid C1	ABCC3	Moderate	≥0.80
Lucid ganoderma	Ganode-8-En-Ric Acid C1	ABCC4	Moderate	≥0.80
Lucid ganoderma	Ganode-8-En-Ric Acid C1	ADH1C	Moderate	≥0.80
Lucid ganoderma	Ganode-8-En-Ric Acid C1	COX1	Moderate	≥0.80
Lucid ganoderma	Ganode-8-En-Ric Acid C1	COX2	Moderate	≥0.80
Lucid ganoderma	Ganode-8-En-Ric Acid C1	IGHG2	Moderate	≥0.80
Lucid ganoderma	Ganode-8-En-Ric Acid C1	PLA2G1B	Moderate	≥0.80
Lucid ganoderma	Ganode-8-En-Ric Acid C1	CYP2E1	Moderate	≥0.80
Lucid ganoderma	Ganode-8-En-Ric Acid C1	FABP1	Moderate	≥0.80
Lucid ganoderma	Ganode-8-En-Ric Acid C1	GSTP1	Moderate	≥0.80
Lucid ganoderma	Ganode-8-En-Ric Acid C1	COX6C	Moderate	≥0.80
Lucid ganoderma	Ganode-8-En-Ric Acid C1	COX8A	Moderate	≥0.80
Lucid ganoderma	Ganode-8-En-Ric Acid C1	COX5B	Moderate	≥0.80
Lucid ganoderma	Ganode-8-En-Ric Acid C1	COX4I1	Moderate	≥0.80
Lucid ganoderma	Ganode-8-En-Ric Acid C1	COX6B1	Moderate	≥0.80
Lucid ganoderma	Ganode-8-En-Ric Acid C1	COX7C	Moderate	≥0.80
Lucid ganoderma	Ganode-8-En-Ric Acid C1	UGT2B7	Moderate	≥0.80
Lucid ganoderma	Ganode-8-En-Ric Acid C1	COX5A	Moderate	≥0.80
Lucid ganoderma	Ganode-8-En-Ric Acid C1	FECH	Moderate	≥0.80
Lucid ganoderma	Ganode-8-En-Ric Acid C1	COX7A1	Moderate	≥0.80
Lucid ganoderma	Ganode-8-En-Ric Acid C1	COX7B	Moderate	≥0.80
Lucid ganoderma	Ganode-8-En-Ric Acid C1	ABCC1	Moderate	≥0.80
Lucid ganoderma	Ganode-8-En-Ric Acid C1	FABP6	Moderate	≥0.80
Lucid ganoderma	Ganode-8-En-Ric Acid C1	AKR1C2	Moderate	≥0.80
Lucid ganoderma	Ganode-8-En-Ric Acid C1	ESRRG	Moderate	≥0.80
Lucid ganoderma	Ganode-8-En-Ric Acid C1	COX6A2	Moderate	≥0.80
Lucid ganoderma	Ganode-8-En-Ric Acid C1	CYP27A1	Moderate	≥0.80
Lucid ganoderma	Ganode-8-En-Ric Acid C1	SLC10A2	Moderate	≥0.80
Lucid ganoderma	Ganode-8-En-Ric Acid C1	SLC10A1	Moderate	≥0.80
Lucid ganoderma	Ganode-8-En-Ric Acid C1	EFTUD1	Moderate	≥0.80
Lucid ganoderma	Ganode-8-En-Ric Acid C1	HSD11B2	Moderate	≥0.80
Lucid ganoderma	Ganode-8-En-Ric Acid C1	GC	Moderate	≥0.80
Lucid ganoderma	Ganode-8-En-Ric Acid C1	HOXA10	Moderate	≥0.80
Lucid ganoderma	Ganoderic Acid Am1	NR3C1	Moderate	≥0.80
Lucid ganoderma	Ganoderic Acid Am1	SLC22A5	Moderate	≥0.80
Lucid ganoderma	Ganoderic Acid Am1	ESR1	Moderate	≥0.80
Lucid ganoderma	Ganoderic Acid Am1	SHBG	Moderate	≥0.80
Lucid ganoderma	Ganoderic Acid Am1	CYP17A1	Moderate	≥0.80
Lucid ganoderma	Ganoderic Acid Am1	ABCB1	Moderate	≥0.80
Lucid ganoderma	Ganoderic Acid Am1	NR3C2	Moderate	≥0.80
Lucid ganoderma	Ganoderic Acid Am1	AR	Moderate	≥0.80
Lucid ganoderma	Ganoderic Acid Am1	CYP11B1	Moderate	≥0.80
Lucid ganoderma	Ganoderic Acid Am1	PRLR	Moderate	≥0.80
Lucid ganoderma	Ganoderic Acid Am1	CYP11B2	Moderate	≥0.80
Lucid ganoderma	Ganoderic Acid Am1	SLCO1A2	Moderate	≥0.80
Lucid ganoderma	Ganoderic Acid Am1	HSD11B2	Moderate	≥0.80
Lucid ganoderma	Ganoderic Acid Am1	SULT2B1	Moderate	≥0.80
Lucid ganoderma	Ganoderic Acid Am1	SLC22A1	Moderate	≥0.80
Lucid ganoderma	Ganoderic Acid Am1	NR1I2	Moderate	≥0.80
Lucid ganoderma	Ganoderic Acid Am1	SLC22A3	Moderate	≥0.80
Lucid ganoderma	Ganoderic Acid Am1	ALB	Moderate	≥0.80
Lucid ganoderma	Ganoderic Acid Am1	CYP1A1	Moderate	≥0.80
Lucid ganoderma	Ganoderic Acid Am1	CYP11A1	Moderate	≥0.80
Lucid ganoderma	Ganoderic Acid Am1	PGR	Moderate	≥0.80
Lucid ganoderma	Ganoderic Acid Am1	CYP3A4	Moderate	≥0.80
Lucid ganoderma	Ganoderic Acid Am1	CYP2C8	Moderate	≥0.80
Lucid ganoderma	Ganoderic Acid Am1	VDR	Moderate	≥0.80
Lucid ganoderma	Ganoderic Acid Am1	CYP19A1	Moderate	≥0.80
Lucid ganoderma	Ganoderic Acid Am1	CYP2C9	Moderate	≥0.80
Lucid ganoderma	Ganoderic Acid Am1	CYP2B6	Moderate	≥0.80
Lucid ganoderma	Ganoderic Acid Am1	CYP3A5	Moderate	≥0.80
Lucid ganoderma	Ganoderic Acid Am1	MAOA	Moderate	≥0.80
Lucid ganoderma	Ganoderic Acid Am1	CYP3A7	Moderate	≥0.80
Lucid ganoderma	Ganoderic Acid Am1	CYP2C19	Moderate	≥0.80
Lucid ganoderma	Ganoderic Acid Am1	RORA	Moderate	≥0.80
Lucid ganoderma	Ganoderic Acid Am1	AKR1C2	Moderate	≥0.80
Lucid ganoderma	Ganoderic Acid Am1	AKR1C1	Moderate	≥0.80
Lucid ganoderma	Ganoderic Acid Am1	SLC10A1	Moderate	≥0.80
Lucid ganoderma	Ganoderic Acid Am1	NR1I3	Moderate	≥0.80
Lucid ganoderma	Ganoderic Acid Am1	NCOA2	Moderate	≥0.80
Lucid ganoderma	Ganoderic Acid Am1	CYP1B1	Moderate	≥0.80
Lucid ganoderma	Ganoderic Acid Am1	CYP2A13	Moderate	≥0.80
Lucid ganoderma	Ganoderic Acid Am1	SLC10A6	Moderate	≥0.80
Lucid ganoderma	Ganoderic Acid Am1	SLC22A8	Moderate	≥0.80
Lucid ganoderma	Ganoderic Acid Am1	SLC22A4	Moderate	≥0.80
Lucid ganoderma	Ganoderic Acid Am1	CYP3A43	Moderate	≥0.80
Lucid ganoderma	Ganoderic Acid Am1	CLEC4E	Moderate	≥0.80
Lucid ganoderma	Ganoderic Acid Am1	ABCG2	Moderate	≥0.80
Lucid ganoderma	Ganoderic Acid Am1	SLC22A7	Moderate	≥0.80
Lucid ganoderma	Ganoderic Acid Am1	HMGCR	Moderate	≥0.80
Lucid ganoderma	Ganoderic Acid Am1	ANXA1	Moderate	≥0.80
Lucid ganoderma	Ganoderic Acid Am1	ITGB2	Moderate	≥0.80
Lucid ganoderma	Ganoderic Acid Am1	SERPINA6	Moderate	≥0.80
Lucid ganoderma	Ganoderic Acid Am1	CYP2D6	Moderate	≥0.80
Lucid ganoderma	Ganoderic Acid Am1	CYP2A6	Moderate	≥0.80
Lucid ganoderma	Ganoderic Acid Am1	HSD3B1	Moderate	≥0.80
Lucid ganoderma	Ganoderic Acid Am1	UGT2B7	Moderate	≥0.80
Lucid ganoderma	Ganoderic Acid Am1	ITGAL	Moderate	≥0.80
Lucid ganoderma	Ganoderic Acid Am1	UGT1A1	Moderate	≥0.80
Lucid ganoderma	Ganoderic Acid Am1	HSD11B1	Moderate	≥0.80
Lucid ganoderma	Ganoderic Acid Am1	UGT1A3	Moderate	≥0.80
Lucid ganoderma	Ganoderic Acid Am1	ABCC2	Moderate	≥0.80
Lucid ganoderma	Ganoderic Acid Am1	SLCO1B1	Moderate	≥0.80
Lucid ganoderma	Ganoderic Acid Am1	IGHG2	Moderate	≥0.80
Lucid ganoderma	Ganoderic Acid Am1	GC	Moderate	≥0.80
Lucid ganoderma	Ganoderic Acid Am1	HOXA10	Moderate	≥0.80
Lucid ganoderma	Ganoderic Acid Am1	CYP24A1	Moderate	≥0.80
Lucid ganoderma	Ganoderic Acid Am1	SLCO2B1	Moderate	≥0.80
Lucid ganoderma	Ganoderic Acid Am1	ABCB11	Moderate	≥0.80
Lucid ganoderma	Ganoderic Acid Am1	CES1	Moderate	≥0.80
Lucid ganoderma	Ganoderic Acid Am1	SLC16A1	Moderate	≥0.80
Lucid ganoderma	Ganoderic Acid Am1	NCOA1	Moderate	≥0.80
Lucid ganoderma	Ganoderic Acid Am1	SLC22A6	Moderate	≥0.80
Lucid ganoderma	Ganoderic Acid Am1	SLCO1B3	Moderate	≥0.80
Lucid ganoderma	Ganoderic Acid Am1	SLC22A11	Moderate	≥0.80
Lucid ganoderma	Ganoderic Acid Am1	LSS	Moderate	≥0.80
Lucid ganoderma	Ganoderic Acid Am1	CYP27B1	Moderate	≥0.80
Lucid ganoderma	Ganoderic Acid Am1	ALOX5	Moderate	≥0.80
Lucid ganoderma	Ganoderic Acid Am1	PTGS1	Moderate	≥0.80
Lucid ganoderma	Ganoderic Acid Am1	NR1H4	Moderate	≥0.80
Lucid ganoderma	Ganoderic Acid Am1	ABCC3	Moderate	≥0.80
Lucid ganoderma	Ganoderic Acid Am1	ABCC4	Moderate	≥0.80
Lucid ganoderma	Ganoderic Acid Am1	ADH1C	Moderate	≥0.80
Lucid ganoderma	Ganoderic Acid Am1	COX1	Moderate	≥0.80
Lucid ganoderma	Ganoderic Acid Am1	COX2	Moderate	≥0.80
Lucid ganoderma	Ganoderic Acid Am1	PLA2G1B	Moderate	≥0.80
Lucid ganoderma	Ganoderic Acid Am1	CYP2E1	Moderate	≥0.80
Lucid ganoderma	Ganoderic Acid Am1	FABP1	Moderate	≥0.80
Lucid ganoderma	Ganoderic Acid Am1	GSTP1	Moderate	≥0.80
Lucid ganoderma	Ganoderic Acid Am1	COX6C	Moderate	≥0.80
Lucid ganoderma	Ganoderic Acid Am1	COX8A	Moderate	≥0.80
Lucid ganoderma	Ganoderic Acid Am1	COX5B	Moderate	≥0.80
Lucid ganoderma	Ganoderic Acid Am1	COX4I1	Moderate	≥0.80
Lucid ganoderma	Ganoderic Acid Am1	COX6B1	Moderate	≥0.80
Lucid ganoderma	Ganoderic Acid Am1	COX7C	Moderate	≥0.80
Lucid ganoderma	Ganoderic Acid Am1	COX5A	Moderate	≥0.80
Lucid ganoderma	Ganoderic Acid Am1	FECH	Moderate	≥0.80
Lucid ganoderma	Ganoderic Acid Am1	COX7A1	Moderate	≥0.80
Lucid ganoderma	Ganoderic Acid Am1	COX7B	Moderate	≥0.80
Lucid ganoderma	Ganoderic Acid Am1	ABCC1	Moderate	≥0.80
Lucid ganoderma	Ganoderic Acid Am1	FABP6	Moderate	≥0.80
Lucid ganoderma	Ganoderic Acid Am1	ESRRG	Moderate	≥0.80
Lucid ganoderma	Ganoderic Acid Am1	COX6A2	Moderate	≥0.80
Lucid ganoderma	Ganoderic Acid Am1	CYP27A1	Moderate	≥0.80
Lucid ganoderma	Ganoderic Acid Am1	SLC10A2	Moderate	≥0.80
Lucid ganoderma	Ganoderic Acid Am1	EFTUD1	Moderate	≥0.80
Lucid ganoderma	Ganoderic Acid B8	NR3C1	Moderate	≥0.80
Lucid ganoderma	Ganoderic Acid B8	SLC22A5	Moderate	≥0.80
Lucid ganoderma	Ganoderic Acid B8	ESR1	Moderate	≥0.80
Lucid ganoderma	Ganoderic Acid B8	SHBG	Moderate	≥0.80
Lucid ganoderma	Ganoderic Acid B8	CYP17A1	Moderate	≥0.80
Lucid ganoderma	Ganoderic Acid B8	ABCB1	Moderate	≥0.80
Lucid ganoderma	Ganoderic Acid B8	NR3C2	Moderate	≥0.80
Lucid ganoderma	Ganoderic Acid B8	AR	Moderate	≥0.80
Lucid ganoderma	Ganoderic Acid B8	CYP11B1	Moderate	≥0.80
Lucid ganoderma	Ganoderic Acid B8	PRLR	Moderate	≥0.80
Lucid ganoderma	Ganoderic Acid B8	CYP11B2	Moderate	≥0.80
Lucid ganoderma	Ganoderic Acid B8	SLCO1A2	Moderate	≥0.80
Lucid ganoderma	Ganoderic Acid B8	HSD11B2	Moderate	≥0.80
Lucid ganoderma	Ganoderic Acid B8	SULT2B1	Moderate	≥0.80
Lucid ganoderma	Ganoderic Acid B8	SLC22A1	Moderate	≥0.80
Lucid ganoderma	Ganoderic Acid B8	NR1I2	Moderate	≥0.80
Lucid ganoderma	Ganoderic Acid B8	SLC22A3	Moderate	≥0.80
Lucid ganoderma	Ganoderic Acid B8	ALB	Moderate	≥0.80
Lucid ganoderma	Ganoderic Acid B8	CYP1A1	Moderate	≥0.80
Lucid ganoderma	Ganoderic Acid B8	CYP11A1	Moderate	≥0.80
Lucid ganoderma	Ganoderic Acid B8	PGR	Moderate	≥0.80
Lucid ganoderma	Ganoderic Acid B8	CYP3A4	Moderate	≥0.80
Lucid ganoderma	Ganoderic Acid B8	CYP2C8	Moderate	≥0.80
Lucid ganoderma	Ganoderic Acid B8	VDR	Moderate	≥0.80
Lucid ganoderma	Ganoderic Acid B8	CYP19A1	Moderate	≥0.80
Lucid ganoderma	Ganoderic Acid B8	CYP2C9	Moderate	≥0.80
Lucid ganoderma	Ganoderic Acid B8	CYP2B6	Moderate	≥0.80
Lucid ganoderma	Ganoderic Acid B8	CYP3A5	Moderate	≥0.80
Lucid ganoderma	Ganoderic Acid B8	MAOA	Moderate	≥0.80
Lucid ganoderma	Ganoderic Acid B8	CYP3A7	Moderate	≥0.80
Lucid ganoderma	Ganoderic Acid B8	CYP2C19	Moderate	≥0.80
Lucid ganoderma	Ganoderic Acid B8	RORA	Moderate	≥0.80
Lucid ganoderma	Ganoderic Acid B8	AKR1C2	Moderate	≥0.80
Lucid ganoderma	Ganoderic Acid B8	AKR1C1	Moderate	≥0.80
Lucid ganoderma	Ganoderic Acid B8	SLC10A1	Moderate	≥0.80
Lucid ganoderma	Ganoderic Acid B8	NR1I3	Moderate	≥0.80
Lucid ganoderma	Ganoderic Acid B8	NCOA2	Moderate	≥0.80
Lucid ganoderma	Ganoderic Acid B8	CYP1B1	Moderate	≥0.80
Lucid ganoderma	Ganoderic Acid B8	CYP2A13	Moderate	≥0.80
Lucid ganoderma	Ganoderic Acid B8	SLC10A6	Moderate	≥0.80
Lucid ganoderma	Ganoderic Acid B8	SLC22A8	Moderate	≥0.80
Lucid ganoderma	Ganoderic Acid B8	SLC22A4	Moderate	≥0.80
Lucid ganoderma	Ganoderic Acid B8	CYP3A43	Moderate	≥0.80
Lucid ganoderma	Ganoderic Acid B8	CLEC4E	Moderate	≥0.80
Lucid ganoderma	Ganoderic Acid B8	ABCG2	Moderate	≥0.80
Lucid ganoderma	Ganoderic Acid B8	SLC22A7	Moderate	≥0.80
Lucid ganoderma	Ganoderic Acid B8	HMGCR	Moderate	≥0.80
Lucid ganoderma	Ganoderic Acid B8	ANXA1	Moderate	≥0.80
Lucid ganoderma	Ganoderic Acid B8	ITGB2	Moderate	≥0.80
Lucid ganoderma	Ganoderic Acid B8	SERPINA6	Moderate	≥0.80
Lucid ganoderma	Ganoderic Acid B8	CYP2D6	Moderate	≥0.80
Lucid ganoderma	Ganoderic Acid B8	CYP2A6	Moderate	≥0.80
Lucid ganoderma	Ganoderic Acid B8	HSD3B1	Moderate	≥0.80
Lucid ganoderma	Ganoderic Acid B8	UGT2B7	Moderate	≥0.80
Lucid ganoderma	Ganoderic Acid B8	ITGAL	Moderate	≥0.80
Lucid ganoderma	Ganoderic Acid B8	UGT1A1	Moderate	≥0.80
Lucid ganoderma	Ganoderic Acid B8	HSD11B1	Moderate	≥0.80
Lucid ganoderma	Ganoderic Acid B8	UGT1A3	Moderate	≥0.80
Lucid ganoderma	Ganoderic Acid B8	ABCC2	Moderate	≥0.80
Lucid ganoderma	Ganoderic Acid B8	SLCO1B1	Moderate	≥0.80
Lucid ganoderma	Ganoderic Acid B8	IGHG2	Moderate	≥0.80
Lucid ganoderma	Ganoderic Acid B8	GC	Moderate	≥0.80
Lucid ganoderma	Ganoderic Acid B8	HOXA10	Moderate	≥0.80
Lucid ganoderma	Ganoderic Acid B8	CYP24A1	Moderate	≥0.80
Lucid ganoderma	Ganoderic Acid B8	SLCO2B1	Moderate	≥0.80
Lucid ganoderma	Ganoderic Acid B8	ABCB11	Moderate	≥0.80
Lucid ganoderma	Ganoderic Acid B8	CES1	Moderate	≥0.80
Lucid ganoderma	Ganoderic Acid B8	SLC16A1	Moderate	≥0.80
Lucid ganoderma	Ganoderic Acid B8	NCOA1	Moderate	≥0.80
Lucid ganoderma	Ganoderic Acid B8	SLC22A6	Moderate	≥0.80
Lucid ganoderma	Ganoderic Acid B8	SLCO1B3	Moderate	≥0.80
Lucid ganoderma	Ganoderic Acid B8	SLC22A11	Moderate	≥0.80
Lucid ganoderma	Ganoderic Acid B8	LSS	Moderate	≥0.80
Lucid ganoderma	Ganoderic Acid B8	CYP27B1	Moderate	≥0.80
Lucid ganoderma	Ganoderic Acid B8	ALOX5	Moderate	≥0.80
Lucid ganoderma	Ganoderic Acid B8	PTGS1	Moderate	≥0.80
Lucid ganoderma	Ganoderic Acid B8	NR1H4	Moderate	≥0.80
Lucid ganoderma	Ganoderic Acid B8	ABCC3	Moderate	≥0.80
Lucid ganoderma	Ganoderic Acid B8	ABCC4	Moderate	≥0.80
Lucid ganoderma	Ganoderic Acid B8	ADH1C	Moderate	≥0.80
Lucid ganoderma	Ganoderic Acid B8	COX1	Moderate	≥0.80
Lucid ganoderma	Ganoderic Acid B8	COX2	Moderate	≥0.80
Lucid ganoderma	Ganoderic Acid B8	PLA2G1B	Moderate	≥0.80
Lucid ganoderma	Ganoderic Acid B8	CYP2E1	Moderate	≥0.80
Lucid ganoderma	Ganoderic Acid B8	FABP1	Moderate	≥0.80
Lucid ganoderma	Ganoderic Acid B8	GSTP1	Moderate	≥0.80
Lucid ganoderma	Ganoderic Acid B8	COX6C	Moderate	≥0.80
Lucid ganoderma	Ganoderic Acid B8	COX8A	Moderate	≥0.80
Lucid ganoderma	Ganoderic Acid B8	COX5B	Moderate	≥0.80
Lucid ganoderma	Ganoderic Acid B8	COX4I1	Moderate	≥0.80
Lucid ganoderma	Ganoderic Acid B8	COX6B1	Moderate	≥0.80
Lucid ganoderma	Ganoderic Acid B8	COX7C	Moderate	≥0.80
Lucid ganoderma	Ganoderic Acid B8	COX5A	Moderate	≥0.80
Lucid ganoderma	Ganoderic Acid B8	FECH	Moderate	≥0.80
Lucid ganoderma	Ganoderic Acid B8	COX7A1	Moderate	≥0.80
Lucid ganoderma	Ganoderic Acid B8	COX7B	Moderate	≥0.80
Lucid ganoderma	Ganoderic Acid B8	ABCC1	Moderate	≥0.80
Lucid ganoderma	Ganoderic Acid B8	FABP6	Moderate	≥0.80
Lucid ganoderma	Ganoderic Acid B8	ESRRG	Moderate	≥0.80
Lucid ganoderma	Ganoderic Acid B8	COX6A2	Moderate	≥0.80
Lucid ganoderma	Ganoderic Acid B8	CYP27A1	Moderate	≥0.80
Lucid ganoderma	Ganoderic Acid B8	SLC10A2	Moderate	≥0.80
Lucid ganoderma	Ganoderic Acid B8	EFTUD1	Moderate	≥0.80
Lucid ganoderma	Ganoderic Acid C1	SLCO2B1	Moderate	≥0.80
Lucid ganoderma	Ganoderic Acid C1	ABCB11	Moderate	≥0.80
Lucid ganoderma	Ganoderic Acid C1	HMGCR	Moderate	≥0.80
Lucid ganoderma	Ganoderic Acid C1	ABCB1	Moderate	≥0.80
Lucid ganoderma	Ganoderic Acid C1	NR3C2	Moderate	≥0.80
Lucid ganoderma	Ganoderic Acid C1	CYP3A4	Moderate	≥0.80
Lucid ganoderma	Ganoderic Acid C1	CYP2C8	Moderate	≥0.80
Lucid ganoderma	Ganoderic Acid C1	CYP2D6	Moderate	≥0.80
Lucid ganoderma	Ganoderic Acid C1	CYP2C9	Moderate	≥0.80
Lucid ganoderma	Ganoderic Acid C1	CYP3A5	Moderate	≥0.80
Lucid ganoderma	Ganoderic Acid C1	CES1	Moderate	≥0.80
Lucid ganoderma	Ganoderic Acid C1	HSD11B1	Moderate	≥0.80
Lucid ganoderma	Ganoderic Acid C1	SLCO1A2	Moderate	≥0.80
Lucid ganoderma	Ganoderic Acid C1	SLC16A1	Moderate	≥0.80
Lucid ganoderma	Ganoderic Acid C1	NCOA1	Moderate	≥0.80
Lucid ganoderma	Ganoderic Acid C1	SLC22A6	Moderate	≥0.80
Lucid ganoderma	Ganoderic Acid C1	SLC22A8	Moderate	≥0.80
Lucid ganoderma	Ganoderic Acid C1	ABCC2	Moderate	≥0.80
Lucid ganoderma	Ganoderic Acid C1	SLCO1B3	Moderate	≥0.80
Lucid ganoderma	Ganoderic Acid C1	SLC22A11	Moderate	≥0.80
Lucid ganoderma	Ganoderic Acid C1	ABCG2	Moderate	≥0.80
Lucid ganoderma	Ganoderic Acid C1	SLC22A7	Moderate	≥0.80
Lucid ganoderma	Ganoderic Acid C1	SLCO1B1	Moderate	≥0.80
Lucid ganoderma	Ganoderic Acid C1	SULT2B1	Moderate	≥0.80
Lucid ganoderma	Ganoderic Acid C1	GABRP	Moderate	≥0.80
Lucid ganoderma	Ganoderic Acid C1	GABRD	Moderate	≥0.80
Lucid ganoderma	Ganoderic Acid C1	GRIN2D	Moderate	≥0.80
Lucid ganoderma	Ganoderic Acid C1	GRIN3B	Moderate	≥0.80
Lucid ganoderma	Ganoderic Acid C1	NR1I2	Moderate	≥0.80
Lucid ganoderma	Ganoderic Acid C1	ESR1	Moderate	≥0.80
Lucid ganoderma	Ganoderic Acid C1	AR	Moderate	≥0.80
Lucid ganoderma	Ganoderic Acid C1	HSD17B1	Moderate	≥0.80
Lucid ganoderma	Ganoderic Acid C1	GABRA1	Moderate	≥0.80
Lucid ganoderma	Ganoderic Acid C1	GABRB1	Moderate	≥0.80
Lucid ganoderma	Ganoderic Acid C1	GABRG2	Moderate	≥0.80
Lucid ganoderma	Ganoderic Acid C1	CYP3A7	Moderate	≥0.80
Lucid ganoderma	Ganoderic Acid C1	GABRB3	Moderate	≥0.80
Lucid ganoderma	Ganoderic Acid C1	GABRA5	Moderate	≥0.80
Lucid ganoderma	Ganoderic Acid C1	GABRA3	Moderate	≥0.80
Lucid ganoderma	Ganoderic Acid C1	GABRA2	Moderate	≥0.80
Lucid ganoderma	Ganoderic Acid C1	GABRB2	Moderate	≥0.80
Lucid ganoderma	Ganoderic Acid C1	GABRA4	Moderate	≥0.80
Lucid ganoderma	Ganoderic Acid C1	GABRE	Moderate	≥0.80
Lucid ganoderma	Ganoderic Acid C1	GRIN1	Moderate	≥0.80
Lucid ganoderma	Ganoderic Acid C1	SULT2A1	Moderate	≥0.80
Lucid ganoderma	Ganoderic Acid C1	PPARA	Moderate	≥0.80
Lucid ganoderma	Ganoderic Acid C1	GRIN2A	Moderate	≥0.80
Lucid ganoderma	Ganoderic Acid C1	GRIN2B	Moderate	≥0.80
Lucid ganoderma	Ganoderic Acid C1	GRIN2C	Moderate	≥0.80
Lucid ganoderma	Ganoderic Acid C1	NR1I3	Moderate	≥0.80
Lucid ganoderma	Ganoderic Acid C1	GABRA6	Moderate	≥0.80
Lucid ganoderma	Ganoderic Acid C1	GABRG1	Moderate	≥0.80
Lucid ganoderma	Ganoderic Acid C1	GRIN3A	Moderate	≥0.80
Lucid ganoderma	Ganoderic Acid C1	ESR2	Moderate	≥0.80
Lucid ganoderma	Ganoderic Acid C1	SIGMAR1	Moderate	≥0.80
Lucid ganoderma	Ganoderic Acid C1	GABRG3	Moderate	≥0.80
Lucid ganoderma	Ganoderic Acid C1	GABRQ	Moderate	≥0.80
Lucid ganoderma	Ganoderic Acid C1	NR3C1	Moderate	≥0.80
Lucid ganoderma	Ganoderic Acid C1	SERPINA6	Moderate	≥0.80
Lucid ganoderma	Ganoderic Acid C1	ALB	Moderate	≥0.80
Lucid ganoderma	Ganoderic Acid C1	SHBG	Moderate	≥0.80
Lucid ganoderma	Ganoderic Acid C1	CYP19A1	Moderate	≥0.80
Lucid ganoderma	Ganoderic Acid C1	CYP2B6	Moderate	≥0.80
Lucid ganoderma	Ganoderic Acid C1	LSS	Moderate	≥0.80
Lucid ganoderma	Ganoderic Acid C1	PGR	Moderate	≥0.80
Lucid ganoderma	Ganoderic Acid C1	CYP27B1	Moderate	≥0.80
Lucid ganoderma	Ganoderic Acid C1	ALOX5	Moderate	≥0.80
Lucid ganoderma	Ganoderic Acid C1	VDR	Moderate	≥0.80
Lucid ganoderma	Ganoderic Acid C1	SRD5A1	Moderate	≥0.80
Lucid ganoderma	Ganoderic Acid C1	COMT	Moderate	≥0.80
Lucid ganoderma	Ganoderic Acid C1	UGT1A1	Moderate	≥0.80
Lucid ganoderma	Ganoderic Acid C1	PTGS1	Moderate	≥0.80
Lucid ganoderma	Ganoderic Acid C1	HSD3B2	Moderate	≥0.80
Lucid ganoderma	Ganoderic Acid C1	SRD5A2	Moderate	≥0.80
Lucid ganoderma	Ganoderic Acid C1	CYP24A1	Moderate	≥0.80
Lucid ganoderma	Ganoderic Acid C1	SRD5A3	Moderate	≥0.80
Lucid ganoderma	Ganoderic Acid C1	NR1H4	Moderate	≥0.80
Lucid ganoderma	Ganoderic Acid C1	RORA	Moderate	≥0.80
Lucid ganoderma	Ganoderic Acid C1	SLC10A6	Moderate	≥0.80
Lucid ganoderma	Ganoderic Acid C1	CLEC4E	Moderate	≥0.80
Lucid ganoderma	Ganoderic Acid C1	ABCC3	Moderate	≥0.80
Lucid ganoderma	Ganoderic Acid C1	ABCC4	Moderate	≥0.80
Lucid ganoderma	Ganoderic Acid C1	ADH1C	Moderate	≥0.80
Lucid ganoderma	Ganoderic Acid C1	COX1	Moderate	≥0.80
Lucid ganoderma	Ganoderic Acid C1	COX2	Moderate	≥0.80
Lucid ganoderma	Ganoderic Acid C1	IGHG2	Moderate	≥0.80
Lucid ganoderma	Ganoderic Acid C1	PLA2G1B	Moderate	≥0.80
Lucid ganoderma	Ganoderic Acid C1	CYP2E1	Moderate	≥0.80
Lucid ganoderma	Ganoderic Acid C1	FABP1	Moderate	≥0.80
Lucid ganoderma	Ganoderic Acid C1	GSTP1	Moderate	≥0.80
Lucid ganoderma	Ganoderic Acid C1	COX6C	Moderate	≥0.80
Lucid ganoderma	Ganoderic Acid C1	COX8A	Moderate	≥0.80
Lucid ganoderma	Ganoderic Acid C1	COX5B	Moderate	≥0.80
Lucid ganoderma	Ganoderic Acid C1	COX4I1	Moderate	≥0.80
Lucid ganoderma	Ganoderic Acid C1	COX6B1	Moderate	≥0.80
Lucid ganoderma	Ganoderic Acid C1	COX7C	Moderate	≥0.80
Lucid ganoderma	Ganoderic Acid C1	UGT2B7	Moderate	≥0.80
Lucid ganoderma	Ganoderic Acid C1	COX5A	Moderate	≥0.80
Lucid ganoderma	Ganoderic Acid C1	FECH	Moderate	≥0.80
Lucid ganoderma	Ganoderic Acid C1	COX7A1	Moderate	≥0.80
Lucid ganoderma	Ganoderic Acid C1	COX7B	Moderate	≥0.80
Lucid ganoderma	Ganoderic Acid C1	ABCC1	Moderate	≥0.80
Lucid ganoderma	Ganoderic Acid C1	FABP6	Moderate	≥0.80
Lucid ganoderma	Ganoderic Acid C1	AKR1C2	Moderate	≥0.80
Lucid ganoderma	Ganoderic Acid C1	ESRRG	Moderate	≥0.80
Lucid ganoderma	Ganoderic Acid C1	COX6A2	Moderate	≥0.80
Lucid ganoderma	Ganoderic Acid C1	CYP27A1	Moderate	≥0.80
Lucid ganoderma	Ganoderic Acid C1	SLC10A2	Moderate	≥0.80
Lucid ganoderma	Ganoderic Acid C1	SLC10A1	Moderate	≥0.80
Lucid ganoderma	Ganoderic Acid C1	EFTUD1	Moderate	≥0.80
Lucid ganoderma	Ganoderic Acid C1	HSD11B2	Moderate	≥0.80
Lucid ganoderma	Ganoderic Acid C1	GC	Moderate	≥0.80
Lucid ganoderma	Ganoderic Acid C1	HOXA10	Moderate	≥0.80
Lucid ganoderma	Ganoderic Acid E	ALB	Moderate	≥0.80
Lucid ganoderma	Ganoderic Acid E	ESR1	Moderate	≥0.80
Lucid ganoderma	Ganoderic Acid E	SHBG	Moderate	≥0.80
Lucid ganoderma	Ganoderic Acid E	CYP3A4	Moderate	≥0.80
Lucid ganoderma	Ganoderic Acid E	AR	Moderate	≥0.80
Lucid ganoderma	Ganoderic Acid E	CYP19A1	Moderate	≥0.80
Lucid ganoderma	Ganoderic Acid E	CYP2B6	Moderate	≥0.80
Lucid ganoderma	Ganoderic Acid E	SLCO1A2	Moderate	≥0.80
Lucid ganoderma	Ganoderic Acid E	LSS	Moderate	≥0.80
Lucid ganoderma	Ganoderic Acid E	SLC22A8	Moderate	≥0.80
Lucid ganoderma	Ganoderic Acid E	NCOA1	Moderate	≥0.80
Lucid ganoderma	Ganoderic Acid E	NR1H4	Moderate	≥0.80
Lucid ganoderma	Ganoderic Acid E	SULT2B1	Moderate	≥0.80
Lucid ganoderma	Ganoderic Acid E	NR1I2	Moderate	≥0.80
Lucid ganoderma	Ganoderic Acid E	ABCB1	Moderate	≥0.80
Lucid ganoderma	Ganoderic Acid E	VDR	Moderate	≥0.80
Lucid ganoderma	Ganoderic Acid E	RORA	Moderate	≥0.80
Lucid ganoderma	Ganoderic Acid E	NR1I3	Moderate	≥0.80
Lucid ganoderma	Ganoderic Acid E	SLC10A6	Moderate	≥0.80
Lucid ganoderma	Ganoderic Acid E	CLEC4E	Moderate	≥0.80
Lucid ganoderma	Ganoderic Acid E	ABCG2	Moderate	≥0.80
Lucid ganoderma	Ganoderic Acid E	NR3C1	Moderate	≥0.80
Lucid ganoderma	Ganoderic Acid E	IGHG2	Moderate	≥0.80
Lucid ganoderma	Ganoderic Acid E	SERPINA6	Moderate	≥0.80
Lucid ganoderma	Ganoderic Acid E	MAOA	Moderate	≥0.80
Lucid ganoderma	Ganoderic Acid E	MAOB	Moderate	≥0.80
Lucid ganoderma	Ganoderic Acid E	HSD11B2	Moderate	≥0.80
Lucid ganoderma	Ganoderic Acid E	PGR	Moderate	≥0.80
Lucid ganoderma	Ganoderic Acid E	ALOX5	Moderate	≥0.80
Lucid ganoderma	Ganoderic Acid E	CYP2C8	Moderate	≥0.80
Lucid ganoderma	Ganoderic Acid E	CYP2C9	Moderate	≥0.80
Lucid ganoderma	Ganoderic Acid E	SRD5A1	Moderate	≥0.80
Lucid ganoderma	Ganoderic Acid E	COMT	Moderate	≥0.80
Lucid ganoderma	Ganoderic Acid E	UGT1A1	Moderate	≥0.80
Lucid ganoderma	Ganoderic Acid E	PTGS1	Moderate	≥0.80
Lucid ganoderma	Ganoderic Acid E	HSD3B2	Moderate	≥0.80
Lucid ganoderma	Ganoderic Acid E	SRD5A2	Moderate	≥0.80
Lucid ganoderma	Ganoderic Acid E	ABCC2	Moderate	≥0.80
Lucid ganoderma	Ganoderic Acid E	SRD5A3	Moderate	≥0.80
Lucid ganoderma	Ganoderic Acid E	SLCO1B1	Moderate	≥0.80
Lucid ganoderma	Ganoderic Acid E	NR3C2	Moderate	≥0.80
Lucid ganoderma	Ganoderic Acid E	ABCB11	Moderate	≥0.80
Lucid ganoderma	Ganoderic Acid E	HSD11B1	Moderate	≥0.80
Lucid ganoderma	Ganoderic Acid E	GABRP	Moderate	≥0.80
Lucid ganoderma	Ganoderic Acid E	GABRD	Moderate	≥0.80
Lucid ganoderma	Ganoderic Acid E	GRIN2D	Moderate	≥0.80
Lucid ganoderma	Ganoderic Acid E	GRIN3B	Moderate	≥0.80
Lucid ganoderma	Ganoderic Acid E	HSD17B1	Moderate	≥0.80
Lucid ganoderma	Ganoderic Acid E	GABRA1	Moderate	≥0.80
Lucid ganoderma	Ganoderic Acid E	GABRB1	Moderate	≥0.80
Lucid ganoderma	Ganoderic Acid E	GABRG2	Moderate	≥0.80
Lucid ganoderma	Ganoderic Acid E	CYP3A7	Moderate	≥0.80
Lucid ganoderma	Ganoderic Acid E	GABRB3	Moderate	≥0.80
Lucid ganoderma	Ganoderic Acid E	GABRA5	Moderate	≥0.80
Lucid ganoderma	Ganoderic Acid E	GABRA3	Moderate	≥0.80
Lucid ganoderma	Ganoderic Acid E	GABRA2	Moderate	≥0.80
Lucid ganoderma	Ganoderic Acid E	GABRB2	Moderate	≥0.80
Lucid ganoderma	Ganoderic Acid E	GABRA4	Moderate	≥0.80
Lucid ganoderma	Ganoderic Acid E	GABRE	Moderate	≥0.80
Lucid ganoderma	Ganoderic Acid E	GRIN1	Moderate	≥0.80
Lucid ganoderma	Ganoderic Acid E	SULT2A1	Moderate	≥0.80
Lucid ganoderma	Ganoderic Acid E	PPARA	Moderate	≥0.80
Lucid ganoderma	Ganoderic Acid E	GRIN2A	Moderate	≥0.80
Lucid ganoderma	Ganoderic Acid E	GRIN2B	Moderate	≥0.80
Lucid ganoderma	Ganoderic Acid E	GRIN2C	Moderate	≥0.80
Lucid ganoderma	Ganoderic Acid E	GABRA6	Moderate	≥0.80
Lucid ganoderma	Ganoderic Acid E	GABRG1	Moderate	≥0.80
Lucid ganoderma	Ganoderic Acid E	GRIN3A	Moderate	≥0.80
Lucid ganoderma	Ganoderic Acid E	ESR2	Moderate	≥0.80
Lucid ganoderma	Ganoderic Acid E	SIGMAR1	Moderate	≥0.80
Lucid ganoderma	Ganoderic Acid E	GABRG3	Moderate	≥0.80
Lucid ganoderma	Ganoderic Acid E	GABRQ	Moderate	≥0.80
Lucid ganoderma	Ganoderiol B	CYP3A4	Moderate	≥0.80
Lucid ganoderma	Ganoderiol B	VDR	Moderate	≥0.80
Lucid ganoderma	Ganoderiol B	UGT1A4	Moderate	≥0.80
Lucid ganoderma	Ganoderiol B	CYP24A1	Moderate	≥0.80
Lucid ganoderma	Ganoderiol B	NR3C1	Moderate	≥0.80
Lucid ganoderma	Ganoderiol B	SERPINA6	Moderate	≥0.80
Lucid ganoderma	Ganoderiol B	BCHE	Moderate	≥0.80
Lucid ganoderma	Ganoderiol B	PTGS2	Moderate	≥0.80
Lucid ganoderma	Ganoderiol B	SLC22A5	Moderate	≥0.80
Lucid ganoderma	Ganoderiol B	CYP17A1	Moderate	≥0.80
Lucid ganoderma	Ganoderiol B	ABCB1	Moderate	≥0.80
Lucid ganoderma	Ganoderiol B	NR3C2	Moderate	≥0.80
Lucid ganoderma	Ganoderiol B	CYP11B1	Moderate	≥0.80
Lucid ganoderma	Ganoderiol B	CYP11B2	Moderate	≥0.80
Lucid ganoderma	Ganoderiol B	SLCO1A2	Moderate	≥0.80
Lucid ganoderma	Ganoderiol B	SLCO1B3	Moderate	≥0.80
Lucid ganoderma	Ganoderiol B	AR	Moderate	≥0.80
Lucid ganoderma	Ganoderiol B	GC	Moderate	≥0.80
Lucid ganoderma	Ganoderiol B	HOXA10	Moderate	≥0.80
Lucid ganoderma	Ganoderiol B	HSD11B2	Moderate	≥0.80
Lucid ganoderma	Ganoderiol B	HSD11B1	Moderate	≥0.80
Lucid ganoderma	Ganoderiol B	NCOA1	Moderate	≥0.80
Lucid ganoderma	Ganoderiol B	NR1I2	Moderate	≥0.80
Lucid ganoderma	Ganoderiol B	ABCB11	Moderate	≥0.80
Lucid ganoderma	Ganoderiol B	ANXA1	Moderate	≥0.80
Lucid ganoderma	Ganoderiol B	CYP1A1	Moderate	≥0.80
Lucid ganoderma	Ganoderiol B	CYP11A1	Moderate	≥0.80
Lucid ganoderma	Ganoderiol B	CYP2E1	Moderate	≥0.80
Lucid ganoderma	Ganoderiol B	CYP2C8	Moderate	≥0.80
Lucid ganoderma	Ganoderiol B	CYP2D6	Moderate	≥0.80
Lucid ganoderma	Ganoderiol B	CYP2A6	Moderate	≥0.80
Lucid ganoderma	Ganoderiol B	CYP19A1	Moderate	≥0.80
Lucid ganoderma	Ganoderiol B	CYP2C9	Moderate	≥0.80
Lucid ganoderma	Ganoderiol B	CYP2B6	Moderate	≥0.80
Lucid ganoderma	Ganoderiol B	CYP3A5	Moderate	≥0.80
Lucid ganoderma	Ganoderiol B	CYP3A7	Moderate	≥0.80
Lucid ganoderma	Ganoderiol B	CYP2C19	Moderate	≥0.80
Lucid ganoderma	Ganoderiol B	NOS2A	Moderate	≥0.80
Lucid ganoderma	Ganoderiol B	NR0B1	Moderate	≥0.80
Lucid ganoderma	Ganoderiol B	CYP4A11	Moderate	≥0.80
Lucid ganoderma	Ganoderiol B	CYP1B1	Moderate	≥0.80
Lucid ganoderma	Ganoderiol B	ABCC2	Moderate	≥0.80
Lucid ganoderma	Ganoderiol B	CYP3A43	Moderate	≥0.80
Lucid ganoderma	Ganoderiol B	ABCG2	Moderate	≥0.80
Lucid ganoderma	Ganoderiol B	ALB	Moderate	≥0.80
Lucid ganoderma	Ganoderiol B	SHBG	Moderate	≥0.80
Lucid ganoderma	Ganoderiol B	HSD3B1	Moderate	≥0.80
Lucid ganoderma	Ganoderiol D	VDR	Moderate	≥0.80
Lucid ganoderma	Ganoderiol D	NR3C1	Moderate	≥0.80
Lucid ganoderma	Ganoderiol D	PGR	Moderate	≥0.80
Lucid ganoderma	Ganoderiol D	CYP2C8	Moderate	≥0.80
Lucid ganoderma	Ganoderiol D	CYP3A4	Moderate	≥0.80
Lucid ganoderma	Ganoderiol D	SLCO1B3	Moderate	≥0.80
Lucid ganoderma	Ganoderiol D	HSD11B2	Moderate	≥0.80
Lucid ganoderma	Ganoderiol D	SERPINA6	Moderate	≥0.80
Lucid ganoderma	Ganoderiol D	SLC22A5	Moderate	≥0.80
Lucid ganoderma	Ganoderiol D	CYP17A1	Moderate	≥0.80
Lucid ganoderma	Ganoderiol D	ABCB1	Moderate	≥0.80
Lucid ganoderma	Ganoderiol D	NR3C2	Moderate	≥0.80
Lucid ganoderma	Ganoderiol D	CYP11B1	Moderate	≥0.80
Lucid ganoderma	Ganoderiol D	CYP11B2	Moderate	≥0.80
Lucid ganoderma	Ganoderiol D	SLCO1A2	Moderate	≥0.80
Lucid ganoderma	Ganoderiol D	AR	Moderate	≥0.80
Lucid ganoderma	Ganoderiol D	HSD11B1	Moderate	≥0.80
Lucid ganoderma	Ganoderiol D	NCOA1	Moderate	≥0.80
Lucid ganoderma	Ganoderiol D	NR1I2	Moderate	≥0.80
Lucid ganoderma	Ganoderiol D	ABCB11	Moderate	≥0.80
Lucid ganoderma	Ganoderiol D	ANXA1	Moderate	≥0.80
Lucid ganoderma	Ganoderiol D	CYP1A1	Moderate	≥0.80
Lucid ganoderma	Ganoderiol D	CYP11A1	Moderate	≥0.80
Lucid ganoderma	Ganoderiol D	CYP2E1	Moderate	≥0.80
Lucid ganoderma	Ganoderiol D	BCHE	Moderate	≥0.80
Lucid ganoderma	Ganoderiol D	CYP2D6	Moderate	≥0.80
Lucid ganoderma	Ganoderiol D	CYP2A6	Moderate	≥0.80
Lucid ganoderma	Ganoderiol D	CYP19A1	Moderate	≥0.80
Lucid ganoderma	Ganoderiol D	CYP2C9	Moderate	≥0.80
Lucid ganoderma	Ganoderiol D	CYP2B6	Moderate	≥0.80
Lucid ganoderma	Ganoderiol D	CYP3A5	Moderate	≥0.80
Lucid ganoderma	Ganoderiol D	CYP3A7	Moderate	≥0.80
Lucid ganoderma	Ganoderiol D	CYP2C19	Moderate	≥0.80
Lucid ganoderma	Ganoderiol D	NOS2A	Moderate	≥0.80
Lucid ganoderma	Ganoderiol D	PTGS2	Moderate	≥0.80
Lucid ganoderma	Ganoderiol D	NR0B1	Moderate	≥0.80
Lucid ganoderma	Ganoderiol D	CYP4A11	Moderate	≥0.80
Lucid ganoderma	Ganoderiol D	CYP1B1	Moderate	≥0.80
Lucid ganoderma	Ganoderiol D	ABCC2	Moderate	≥0.80
Lucid ganoderma	Ganoderiol D	CYP3A43	Moderate	≥0.80
Lucid ganoderma	Ganoderiol D	ABCG2	Moderate	≥0.80
Lucid ganoderma	Ganoderiol D	ALB	Moderate	≥0.80
Lucid ganoderma	Ganoderiol D	SHBG	Moderate	≥0.80
Lucid ganoderma	Ganoderiol D	HSD3B1	Moderate	≥0.80
Lucid ganoderma	Ganoderiol F	NR1I2	Moderate	≥0.80
Lucid ganoderma	Ganoderiol F	ABCB11	Moderate	≥0.80
Lucid ganoderma	Ganoderiol F	ANXA1	Moderate	≥0.80
Lucid ganoderma	Ganoderiol F	NR3C1	Moderate	≥0.80
Lucid ganoderma	Ganoderiol F	CYP1A1	Moderate	≥0.80
Lucid ganoderma	Ganoderiol F	CYP17A1	Moderate	≥0.80
Lucid ganoderma	Ganoderiol F	CYP11A1	Moderate	≥0.80
Lucid ganoderma	Ganoderiol F	CYP2E1	Moderate	≥0.80
Lucid ganoderma	Ganoderiol F	ABCB1	Moderate	≥0.80
Lucid ganoderma	Ganoderiol F	CYP3A4	Moderate	≥0.80
Lucid ganoderma	Ganoderiol F	CYP2C8	Moderate	≥0.80
Lucid ganoderma	Ganoderiol F	CYP2D6	Moderate	≥0.80
Lucid ganoderma	Ganoderiol F	CYP2A6	Moderate	≥0.80
Lucid ganoderma	Ganoderiol F	CYP19A1	Moderate	≥0.80
Lucid ganoderma	Ganoderiol F	CYP2C9	Moderate	≥0.80
Lucid ganoderma	Ganoderiol F	CYP2B6	Moderate	≥0.80
Lucid ganoderma	Ganoderiol F	CYP3A5	Moderate	≥0.80
Lucid ganoderma	Ganoderiol F	CYP3A7	Moderate	≥0.80
Lucid ganoderma	Ganoderiol F	CYP2C19	Moderate	≥0.80
Lucid ganoderma	Ganoderiol F	NOS2A	Moderate	≥0.80
Lucid ganoderma	Ganoderiol F	SLCO1A2	Moderate	≥0.80
Lucid ganoderma	Ganoderiol F	NR0B1	Moderate	≥0.80
Lucid ganoderma	Ganoderiol F	CYP4A11	Moderate	≥0.80
Lucid ganoderma	Ganoderiol F	CYP1B1	Moderate	≥0.80
Lucid ganoderma	Ganoderiol F	ABCC2	Moderate	≥0.80
Lucid ganoderma	Ganoderiol F	CYP3A43	Moderate	≥0.80
Lucid ganoderma	Ganoderiol F	ABCG2	Moderate	≥0.80
Lucid ganoderma	Ganoderiol F	GC	Moderate	≥0.80
Lucid ganoderma	Ganoderiol F	VDR	Moderate	≥0.80
Lucid ganoderma	Ganoderiol F	HOXA10	Moderate	≥0.80
Lucid ganoderma	Ganoderiol F	CYP24A1	Moderate	≥0.80
Lucid ganoderma	Ganoderiol F	ALB	Moderate	≥0.80
Lucid ganoderma	Ganoderiol F	SHBG	Moderate	≥0.80
Lucid ganoderma	Ganoderiol F	SERPINA6	Moderate	≥0.80
Lucid ganoderma	Ganoderiol F	HSD3B1	Moderate	≥0.80
Lucid ganoderma	Ganoderiol F	CYP11B1	Moderate	≥0.80
Lucid ganoderma	Ganoderiol F	CYP11B2	Moderate	≥0.80
Lucid ganoderma	Ganoderiol F	HSD11B1	Moderate	≥0.80
Lucid ganoderma	Ganoderiol F	HSD11B2	Moderate	≥0.80
Lucid ganoderma	Ganoderiol F	UGT1A4	Moderate	≥0.80
Lucid ganoderma	Ganodermanondiol	NR3C2	Moderate	≥0.80
Lucid ganoderma	Ganodermanondiol	HSD11B1	Moderate	≥0.80
Lucid ganoderma	Ganodermanondiol	NCOA1	Moderate	≥0.80
Lucid ganoderma	Ganodermanondiol	SULT2B1	Moderate	≥0.80
Lucid ganoderma	Ganodermanondiol	GABRP	Moderate	≥0.80
Lucid ganoderma	Ganodermanondiol	GABRD	Moderate	≥0.80
Lucid ganoderma	Ganodermanondiol	GRIN2D	Moderate	≥0.80
Lucid ganoderma	Ganodermanondiol	GRIN3B	Moderate	≥0.80
Lucid ganoderma	Ganodermanondiol	NR1I2	Moderate	≥0.80
Lucid ganoderma	Ganodermanondiol	ESR1	Moderate	≥0.80
Lucid ganoderma	Ganodermanondiol	CYP3A4	Moderate	≥0.80
Lucid ganoderma	Ganodermanondiol	AR	Moderate	≥0.80
Lucid ganoderma	Ganodermanondiol	HSD17B1	Moderate	≥0.80
Lucid ganoderma	Ganodermanondiol	GABRA1	Moderate	≥0.80
Lucid ganoderma	Ganodermanondiol	GABRB1	Moderate	≥0.80
Lucid ganoderma	Ganodermanondiol	GABRG2	Moderate	≥0.80
Lucid ganoderma	Ganodermanondiol	CYP3A7	Moderate	≥0.80
Lucid ganoderma	Ganodermanondiol	GABRB3	Moderate	≥0.80
Lucid ganoderma	Ganodermanondiol	GABRA5	Moderate	≥0.80
Lucid ganoderma	Ganodermanondiol	GABRA3	Moderate	≥0.80
Lucid ganoderma	Ganodermanondiol	GABRA2	Moderate	≥0.80
Lucid ganoderma	Ganodermanondiol	GABRB2	Moderate	≥0.80
Lucid ganoderma	Ganodermanondiol	GABRA4	Moderate	≥0.80
Lucid ganoderma	Ganodermanondiol	GABRE	Moderate	≥0.80
Lucid ganoderma	Ganodermanondiol	GRIN1	Moderate	≥0.80
Lucid ganoderma	Ganodermanondiol	SULT2A1	Moderate	≥0.80
Lucid ganoderma	Ganodermanondiol	PPARA	Moderate	≥0.80
Lucid ganoderma	Ganodermanondiol	GRIN2A	Moderate	≥0.80
Lucid ganoderma	Ganodermanondiol	GRIN2B	Moderate	≥0.80
Lucid ganoderma	Ganodermanondiol	GRIN2C	Moderate	≥0.80
Lucid ganoderma	Ganodermanondiol	NR1I3	Moderate	≥0.80
Lucid ganoderma	Ganodermanondiol	GABRA6	Moderate	≥0.80
Lucid ganoderma	Ganodermanondiol	GABRG1	Moderate	≥0.80
Lucid ganoderma	Ganodermanondiol	GRIN3A	Moderate	≥0.80
Lucid ganoderma	Ganodermanondiol	ESR2	Moderate	≥0.80
Lucid ganoderma	Ganodermanondiol	SIGMAR1	Moderate	≥0.80
Lucid ganoderma	Ganodermanondiol	GABRG3	Moderate	≥0.80
Lucid ganoderma	Ganodermanondiol	GABRQ	Moderate	≥0.80
Lucid ganoderma	Ganodermanondiol	NR3C1	Moderate	≥0.80
Lucid ganoderma	Ganodermanondiol	SERPINA6	Moderate	≥0.80
Lucid ganoderma	Ganodermanondiol	PGR	Moderate	≥0.80
Lucid ganoderma	Ganodermanondiol	ABCB1	Moderate	≥0.80
Lucid ganoderma	Ganodermanondiol	CYP2C8	Moderate	≥0.80
Lucid ganoderma	Ganodermanondiol	VDR	Moderate	≥0.80
Lucid ganoderma	Ganodermanondiol	UGT1A4	Moderate	≥0.80
Lucid ganoderma	Ganodermanondiol	CYP24A1	Moderate	≥0.80
Lucid ganoderma	Ganodermanondiol	SHBG	Moderate	≥0.80
Lucid ganoderma	Ganodermanondiol	PRLR	Moderate	≥0.80
Lucid ganoderma	Ganodermanondiol	HSD11B2	Moderate	≥0.80
Lucid ganoderma	Ganodermanondiol	SLC22A1	Moderate	≥0.80
Lucid ganoderma	Ganodermanondiol	SLC22A3	Moderate	≥0.80
Lucid ganoderma	Ganodermanondiol	ALB	Moderate	≥0.80
Lucid ganoderma	Ganodermanondiol	CYP1A1	Moderate	≥0.80
Lucid ganoderma	Ganodermanondiol	CYP11A1	Moderate	≥0.80
Lucid ganoderma	Ganodermanondiol	CYP19A1	Moderate	≥0.80
Lucid ganoderma	Ganodermanondiol	CYP2C9	Moderate	≥0.80
Lucid ganoderma	Ganodermanondiol	CYP2B6	Moderate	≥0.80
Lucid ganoderma	Ganodermanondiol	CYP3A5	Moderate	≥0.80
Lucid ganoderma	Ganodermanondiol	MAOA	Moderate	≥0.80
Lucid ganoderma	Ganodermanondiol	CYP2C19	Moderate	≥0.80
Lucid ganoderma	Ganodermanondiol	RORA	Moderate	≥0.80
Lucid ganoderma	Ganodermanondiol	SLCO1A2	Moderate	≥0.80
Lucid ganoderma	Ganodermanondiol	AKR1C2	Moderate	≥0.80
Lucid ganoderma	Ganodermanondiol	AKR1C1	Moderate	≥0.80
Lucid ganoderma	Ganodermanondiol	SLC10A1	Moderate	≥0.80
Lucid ganoderma	Ganodermanondiol	NCOA2	Moderate	≥0.80
Lucid ganoderma	Ganodermanondiol	CYP1B1	Moderate	≥0.80
Lucid ganoderma	Ganodermanondiol	CYP2A13	Moderate	≥0.80
Lucid ganoderma	Ganodermanondiol	SLC10A6	Moderate	≥0.80
Lucid ganoderma	Ganodermanondiol	SLC22A8	Moderate	≥0.80
Lucid ganoderma	Ganodermanondiol	SLC22A4	Moderate	≥0.80
Lucid ganoderma	Ganodermanondiol	CYP3A43	Moderate	≥0.80
Lucid ganoderma	Ganodermanondiol	CLEC4E	Moderate	≥0.80
Lucid ganoderma	Ganodermanondiol	ABCG2	Moderate	≥0.80
Lucid ganoderma	Ganodermanondiol	SLC22A7	Moderate	≥0.80
Lucid ganoderma	Ganodermanondiol	GC	Moderate	≥0.80
Lucid ganoderma	Ganodermanondiol	HOXA10	Moderate	≥0.80
Lucid ganoderma	Ganodermanondiol	ABCB11	Moderate	≥0.80
Lucid ganoderma	Ganodermanondiol	ABCC2	Moderate	≥0.80
Lucid ganoderma	Ganodermanondiol	LSS	Moderate	≥0.80
Lucid ganoderma	Ganodermanondiol	CYP27B1	Moderate	≥0.80
Lucid ganoderma	Ganodermanondiol	IGHG2	Moderate	≥0.80
Lucid ganoderma	Ganodermanontriol	ATP1A1	Moderate	≥0.80
Lucid ganoderma	Ganodermanontriol	NR3C1	Moderate	≥0.80
Lucid ganoderma	Ganodermanontriol	GC	Moderate	≥0.80
Lucid ganoderma	Ganodermanontriol	CYP3A4	Moderate	≥0.80
Lucid ganoderma	Ganodermanontriol	VDR	Moderate	≥0.80
Lucid ganoderma	Ganodermanontriol	HOXA10	Moderate	≥0.80
Lucid ganoderma	Ganodermanontriol	HSD11B2	Moderate	≥0.80
Lucid ganoderma	Ganodermanontriol	CYP24A1	Moderate	≥0.80
Lucid ganoderma	Ganodermanontriol	SERPINA6	Moderate	≥0.80
Lucid ganoderma	Ganodermanontriol	SLC22A5	Moderate	≥0.80
Lucid ganoderma	Ganodermanontriol	CYP17A1	Moderate	≥0.80
Lucid ganoderma	Ganodermanontriol	ABCB1	Moderate	≥0.80
Lucid ganoderma	Ganodermanontriol	NR3C2	Moderate	≥0.80
Lucid ganoderma	Ganodermanontriol	CYP11B1	Moderate	≥0.80
Lucid ganoderma	Ganodermanontriol	CYP11B2	Moderate	≥0.80
Lucid ganoderma	Ganodermanontriol	SLCO1A2	Moderate	≥0.80
Lucid ganoderma	Ganodermanontriol	SLCO1B3	Moderate	≥0.80
Lucid ganoderma	Ganodermanontriol	AR	Moderate	≥0.80
Lucid ganoderma	Ganodermanontriol	HSD11B1	Moderate	≥0.80
Lucid ganoderma	Ganodermanontriol	NCOA1	Moderate	≥0.80
Lucid ganoderma	Ganodermanontriol	NR1I2	Moderate	≥0.80
Lucid ganoderma	Ganodermanontriol	ABCB11	Moderate	≥0.80
Lucid ganoderma	Ganodermanontriol	ANXA1	Moderate	≥0.80
Lucid ganoderma	Ganodermanontriol	CYP1A1	Moderate	≥0.80
Lucid ganoderma	Ganodermanontriol	CYP11A1	Moderate	≥0.80
Lucid ganoderma	Ganodermanontriol	CYP2E1	Moderate	≥0.80
Lucid ganoderma	Ganodermanontriol	BCHE	Moderate	≥0.80
Lucid ganoderma	Ganodermanontriol	CYP2C8	Moderate	≥0.80
Lucid ganoderma	Ganodermanontriol	CYP2D6	Moderate	≥0.80
Lucid ganoderma	Ganodermanontriol	CYP2A6	Moderate	≥0.80
Lucid ganoderma	Ganodermanontriol	CYP19A1	Moderate	≥0.80
Lucid ganoderma	Ganodermanontriol	CYP2C9	Moderate	≥0.80
Lucid ganoderma	Ganodermanontriol	CYP2B6	Moderate	≥0.80
Lucid ganoderma	Ganodermanontriol	CYP3A5	Moderate	≥0.80
Lucid ganoderma	Ganodermanontriol	CYP3A7	Moderate	≥0.80
Lucid ganoderma	Ganodermanontriol	CYP2C19	Moderate	≥0.80
Lucid ganoderma	Ganodermanontriol	NOS2A	Moderate	≥0.80
Lucid ganoderma	Ganodermanontriol	PTGS2	Moderate	≥0.80
Lucid ganoderma	Ganodermanontriol	NR0B1	Moderate	≥0.80
Lucid ganoderma	Ganodermanontriol	CYP4A11	Moderate	≥0.80
Lucid ganoderma	Ganodermanontriol	CYP1B1	Moderate	≥0.80
Lucid ganoderma	Ganodermanontriol	ABCC2	Moderate	≥0.80
Lucid ganoderma	Ganodermanontriol	CYP3A43	Moderate	≥0.80
Lucid ganoderma	Ganodermanontriol	ABCG2	Moderate	≥0.80
Lucid ganoderma	Ganodermanontriol	ALB	Moderate	≥0.80
Lucid ganoderma	Ganodermanontriol	SHBG	Moderate	≥0.80
Lucid ganoderma	Ganodermanontriol	HSD3B1	Moderate	≥0.80
Lucid ganoderma	Ganolactone	NR3C1	Moderate	≥0.80
Lucid ganoderma	Ganolactone	HMGCR	Moderate	≥0.80
Lucid ganoderma	Ganolactone	ITGB2	Moderate	≥0.80
Lucid ganoderma	Ganolactone	ABCB1	Moderate	≥0.80
Lucid ganoderma	Ganolactone	CYP3A4	Moderate	≥0.80
Lucid ganoderma	Ganolactone	CYP2C8	Moderate	≥0.80
Lucid ganoderma	Ganolactone	CYP2D6	Moderate	≥0.80
Lucid ganoderma	Ganolactone	CYP2C9	Moderate	≥0.80
Lucid ganoderma	Ganolactone	UGT2B7	Moderate	≥0.80
Lucid ganoderma	Ganolactone	ITGAL	Moderate	≥0.80
Lucid ganoderma	Ganolactone	CYP2B6	Moderate	≥0.80
Lucid ganoderma	Ganolactone	CYP3A5	Moderate	≥0.80
Lucid ganoderma	Ganolactone	UGT1A1	Moderate	≥0.80
Lucid ganoderma	Ganolactone	CYP3A7	Moderate	≥0.80
Lucid ganoderma	Ganolactone	CYP2C19	Moderate	≥0.80
Lucid ganoderma	Ganolactone	UGT1A3	Moderate	≥0.80
Lucid ganoderma	Ganolactone	SLCO1A2	Moderate	≥0.80
Lucid ganoderma	Ganolactone	ABCC2	Moderate	≥0.80
Lucid ganoderma	Ganolactone	SLCO1B1	Moderate	≥0.80
Lucid ganoderma	Ganolactone	SERPINA6	Moderate	≥0.80
Lucid ganoderma	Ganolactone	CACNB4	Moderate	≥0.80
Lucid ganoderma	Ganolactone	CACNA1A	Moderate	≥0.80
Lucid ganoderma	Ganolactone	CACNA1G	Moderate	≥0.80
Lucid ganoderma	Ganolactone	CACNA1F	Moderate	≥0.80
Lucid ganoderma	Ganolactone	NR1I2	Moderate	≥0.80
Lucid ganoderma	Ganolactone	CACNA1H	Moderate	≥0.80
Lucid ganoderma	Ganolactone	IGHG2	Moderate	≥0.80
Lucid ganoderma	Ganolactone	SHBG	Moderate	≥0.80
Lucid ganoderma	Ganolactone	PGR	Moderate	≥0.80
Lucid ganoderma	Ganolactone	NR3C2	Moderate	≥0.80
Lucid ganoderma	Ganolactone	AR	Moderate	≥0.80
Lucid ganoderma	Ganolactone	CYP11B1	Moderate	≥0.80
Lucid ganoderma	Ganolactone	SRD5A1	Moderate	≥0.80
Lucid ganoderma	Ganolactone	CYP11B2	Moderate	≥0.80
Lucid ganoderma	Ganolactone	SRD5A2	Moderate	≥0.80
Lucid ganoderma	Ganolactone	CACNB3	Moderate	≥0.80
Lucid ganoderma	Ganolactone	CACNA2D1	Moderate	≥0.80
Lucid ganoderma	Ganolactone	CACNA1B	Moderate	≥0.80
Lucid ganoderma	Ganolactone	CACNA1D	Moderate	≥0.80
Lucid ganoderma	Ganolactone	CACNB1	Moderate	≥0.80
Lucid ganoderma	Ganolactone	CACNG1	Moderate	≥0.80
Lucid ganoderma	Ganolactone	CACNB2	Moderate	≥0.80
Lucid ganoderma	Ganolactone	CACNA1S	Moderate	≥0.80
Lucid ganoderma	Ganolactone	CACNA1C	Moderate	≥0.80
Lucid ganoderma	Ganolactone	CACNA2D3	Moderate	≥0.80
Lucid ganoderma	Ganolactone	SRD5A3	Moderate	≥0.80
Lucid ganoderma	Ganolactone	CACNA2D2	Moderate	≥0.80
Lucid ganoderma	Ganolactone	CACNA1I	Moderate	≥0.80
Lucid ganoderma	Ganolactone	CES1	Moderate	≥0.80
Lucid ganoderma	Ganolucidic Acid A	NR3C1	Moderate	≥0.80
Lucid ganoderma	Ganolucidic Acid A	SLC22A5	Moderate	≥0.80
Lucid ganoderma	Ganolucidic Acid A	ESR1	Moderate	≥0.80
Lucid ganoderma	Ganolucidic Acid A	SHBG	Moderate	≥0.80
Lucid ganoderma	Ganolucidic Acid A	CYP17A1	Moderate	≥0.80
Lucid ganoderma	Ganolucidic Acid A	ABCB1	Moderate	≥0.80
Lucid ganoderma	Ganolucidic Acid A	NR3C2	Moderate	≥0.80
Lucid ganoderma	Ganolucidic Acid A	AR	Moderate	≥0.80
Lucid ganoderma	Ganolucidic Acid A	CYP11B1	Moderate	≥0.80
Lucid ganoderma	Ganolucidic Acid A	PRLR	Moderate	≥0.80
Lucid ganoderma	Ganolucidic Acid A	CYP11B2	Moderate	≥0.80
Lucid ganoderma	Ganolucidic Acid A	SLCO1A2	Moderate	≥0.80
Lucid ganoderma	Ganolucidic Acid A	HSD11B2	Moderate	≥0.80
Lucid ganoderma	Ganolucidic Acid A	SULT2B1	Moderate	≥0.80
Lucid ganoderma	Ganolucidic Acid A	SLC22A1	Moderate	≥0.80
Lucid ganoderma	Ganolucidic Acid A	NR1I2	Moderate	≥0.80
Lucid ganoderma	Ganolucidic Acid A	SLC22A3	Moderate	≥0.80
Lucid ganoderma	Ganolucidic Acid A	ALB	Moderate	≥0.80
Lucid ganoderma	Ganolucidic Acid A	CYP1A1	Moderate	≥0.80
Lucid ganoderma	Ganolucidic Acid A	CYP11A1	Moderate	≥0.80
Lucid ganoderma	Ganolucidic Acid A	PGR	Moderate	≥0.80
Lucid ganoderma	Ganolucidic Acid A	CYP3A4	Moderate	≥0.80
Lucid ganoderma	Ganolucidic Acid A	CYP2C8	Moderate	≥0.80
Lucid ganoderma	Ganolucidic Acid A	VDR	Moderate	≥0.80
Lucid ganoderma	Ganolucidic Acid A	CYP19A1	Moderate	≥0.80
Lucid ganoderma	Ganolucidic Acid A	CYP2C9	Moderate	≥0.80
Lucid ganoderma	Ganolucidic Acid A	CYP2B6	Moderate	≥0.80
Lucid ganoderma	Ganolucidic Acid A	CYP3A5	Moderate	≥0.80
Lucid ganoderma	Ganolucidic Acid A	MAOA	Moderate	≥0.80
Lucid ganoderma	Ganolucidic Acid A	CYP3A7	Moderate	≥0.80
Lucid ganoderma	Ganolucidic Acid A	CYP2C19	Moderate	≥0.80
Lucid ganoderma	Ganolucidic Acid A	RORA	Moderate	≥0.80
Lucid ganoderma	Ganolucidic Acid A	AKR1C2	Moderate	≥0.80
Lucid ganoderma	Ganolucidic Acid A	AKR1C1	Moderate	≥0.80
Lucid ganoderma	Ganolucidic Acid A	SLC10A1	Moderate	≥0.80
Lucid ganoderma	Ganolucidic Acid A	NR1I3	Moderate	≥0.80
Lucid ganoderma	Ganolucidic Acid A	NCOA2	Moderate	≥0.80
Lucid ganoderma	Ganolucidic Acid A	CYP1B1	Moderate	≥0.80
Lucid ganoderma	Ganolucidic Acid A	CYP2A13	Moderate	≥0.80
Lucid ganoderma	Ganolucidic Acid A	SLC10A6	Moderate	≥0.80
Lucid ganoderma	Ganolucidic Acid A	SLC22A8	Moderate	≥0.80
Lucid ganoderma	Ganolucidic Acid A	SLC22A4	Moderate	≥0.80
Lucid ganoderma	Ganolucidic Acid A	CYP3A43	Moderate	≥0.80
Lucid ganoderma	Ganolucidic Acid A	CLEC4E	Moderate	≥0.80
Lucid ganoderma	Ganolucidic Acid A	ABCG2	Moderate	≥0.80
Lucid ganoderma	Ganolucidic Acid A	SLC22A7	Moderate	≥0.80
Lucid ganoderma	Ganolucidic Acid A	HMGCR	Moderate	≥0.80
Lucid ganoderma	Ganolucidic Acid A	ANXA1	Moderate	≥0.80
Lucid ganoderma	Ganolucidic Acid A	ITGB2	Moderate	≥0.80
Lucid ganoderma	Ganolucidic Acid A	SERPINA6	Moderate	≥0.80
Lucid ganoderma	Ganolucidic Acid A	CYP2D6	Moderate	≥0.80
Lucid ganoderma	Ganolucidic Acid A	CYP2A6	Moderate	≥0.80
Lucid ganoderma	Ganolucidic Acid A	HSD3B1	Moderate	≥0.80
Lucid ganoderma	Ganolucidic Acid A	UGT2B7	Moderate	≥0.80
Lucid ganoderma	Ganolucidic Acid A	ITGAL	Moderate	≥0.80
Lucid ganoderma	Ganolucidic Acid A	UGT1A1	Moderate	≥0.80
Lucid ganoderma	Ganolucidic Acid A	HSD11B1	Moderate	≥0.80
Lucid ganoderma	Ganolucidic Acid A	UGT1A3	Moderate	≥0.80
Lucid ganoderma	Ganolucidic Acid A	ABCC2	Moderate	≥0.80
Lucid ganoderma	Ganolucidic Acid A	SLCO1B1	Moderate	≥0.80
Lucid ganoderma	Ganolucidic Acid A	IGHG2	Moderate	≥0.80
Lucid ganoderma	Ganolucidic Acid A	GC	Moderate	≥0.80
Lucid ganoderma	Ganolucidic Acid A	HOXA10	Moderate	≥0.80
Lucid ganoderma	Ganolucidic Acid A	CYP24A1	Moderate	≥0.80
Lucid ganoderma	Ganolucidic Acid A	SLCO2B1	Moderate	≥0.80
Lucid ganoderma	Ganolucidic Acid A	ABCB11	Moderate	≥0.80
Lucid ganoderma	Ganolucidic Acid A	CES1	Moderate	≥0.80
Lucid ganoderma	Ganolucidic Acid A	SLC16A1	Moderate	≥0.80
Lucid ganoderma	Ganolucidic Acid A	NCOA1	Moderate	≥0.80
Lucid ganoderma	Ganolucidic Acid A	SLC22A6	Moderate	≥0.80
Lucid ganoderma	Ganolucidic Acid A	SLCO1B3	Moderate	≥0.80
Lucid ganoderma	Ganolucidic Acid A	SLC22A11	Moderate	≥0.80
Lucid ganoderma	Ganolucidic Acid A	LSS	Moderate	≥0.80
Lucid ganoderma	Ganolucidic Acid A	CYP27B1	Moderate	≥0.80
Lucid ganoderma	Ganolucidic Acid A	ALOX5	Moderate	≥0.80
Lucid ganoderma	Ganolucidic Acid A	PTGS1	Moderate	≥0.80
Lucid ganoderma	Ganolucidic Acid A	NR1H4	Moderate	≥0.80
Lucid ganoderma	Ganolucidic Acid A	ABCC3	Moderate	≥0.80
Lucid ganoderma	Ganolucidic Acid A	ABCC4	Moderate	≥0.80
Lucid ganoderma	Ganolucidic Acid A	ADH1C	Moderate	≥0.80
Lucid ganoderma	Ganolucidic Acid A	COX1	Moderate	≥0.80
Lucid ganoderma	Ganolucidic Acid A	COX2	Moderate	≥0.80
Lucid ganoderma	Ganolucidic Acid A	PLA2G1B	Moderate	≥0.80
Lucid ganoderma	Ganolucidic Acid A	CYP2E1	Moderate	≥0.80
Lucid ganoderma	Ganolucidic Acid A	FABP1	Moderate	≥0.80
Lucid ganoderma	Ganolucidic Acid A	GSTP1	Moderate	≥0.80
Lucid ganoderma	Ganolucidic Acid A	COX6C	Moderate	≥0.80
Lucid ganoderma	Ganolucidic Acid A	COX8A	Moderate	≥0.80
Lucid ganoderma	Ganolucidic Acid A	COX5B	Moderate	≥0.80
Lucid ganoderma	Ganolucidic Acid A	COX4I1	Moderate	≥0.80
Lucid ganoderma	Ganolucidic Acid A	COX6B1	Moderate	≥0.80
Lucid ganoderma	Ganolucidic Acid A	COX7C	Moderate	≥0.80
Lucid ganoderma	Ganolucidic Acid A	COX5A	Moderate	≥0.80
Lucid ganoderma	Ganolucidic Acid A	FECH	Moderate	≥0.80
Lucid ganoderma	Ganolucidic Acid A	COX7A1	Moderate	≥0.80
Lucid ganoderma	Ganolucidic Acid A	COX7B	Moderate	≥0.80
Lucid ganoderma	Ganolucidic Acid A	ABCC1	Moderate	≥0.80
Lucid ganoderma	Ganolucidic Acid A	FABP6	Moderate	≥0.80
Lucid ganoderma	Ganolucidic Acid A	ESRRG	Moderate	≥0.80
Lucid ganoderma	Ganolucidic Acid A	COX6A2	Moderate	≥0.80
Lucid ganoderma	Ganolucidic Acid A	CYP27A1	Moderate	≥0.80
Lucid ganoderma	Ganolucidic Acid A	SLC10A2	Moderate	≥0.80
Lucid ganoderma	Ganolucidic Acid A	EFTUD1	Moderate	≥0.80
Lucid ganoderma	Ganolucidic Acid B	NR3C1	Moderate	≥0.80
Lucid ganoderma	Ganolucidic Acid B	SLC22A5	Moderate	≥0.80
Lucid ganoderma	Ganolucidic Acid B	ESR1	Moderate	≥0.80
Lucid ganoderma	Ganolucidic Acid B	SHBG	Moderate	≥0.80
Lucid ganoderma	Ganolucidic Acid B	CYP17A1	Moderate	≥0.80
Lucid ganoderma	Ganolucidic Acid B	ABCB1	Moderate	≥0.80
Lucid ganoderma	Ganolucidic Acid B	NR3C2	Moderate	≥0.80
Lucid ganoderma	Ganolucidic Acid B	AR	Moderate	≥0.80
Lucid ganoderma	Ganolucidic Acid B	CYP11B1	Moderate	≥0.80
Lucid ganoderma	Ganolucidic Acid B	PRLR	Moderate	≥0.80
Lucid ganoderma	Ganolucidic Acid B	CYP11B2	Moderate	≥0.80
Lucid ganoderma	Ganolucidic Acid B	SLCO1A2	Moderate	≥0.80
Lucid ganoderma	Ganolucidic Acid B	HSD11B2	Moderate	≥0.80
Lucid ganoderma	Ganolucidic Acid B	SULT2B1	Moderate	≥0.80
Lucid ganoderma	Ganolucidic Acid B	SLC22A1	Moderate	≥0.80
Lucid ganoderma	Ganolucidic Acid B	NR1I2	Moderate	≥0.80
Lucid ganoderma	Ganolucidic Acid B	SLC22A3	Moderate	≥0.80
Lucid ganoderma	Ganolucidic Acid B	ALB	Moderate	≥0.80
Lucid ganoderma	Ganolucidic Acid B	CYP1A1	Moderate	≥0.80
Lucid ganoderma	Ganolucidic Acid B	CYP11A1	Moderate	≥0.80
Lucid ganoderma	Ganolucidic Acid B	PGR	Moderate	≥0.80
Lucid ganoderma	Ganolucidic Acid B	CYP3A4	Moderate	≥0.80
Lucid ganoderma	Ganolucidic Acid B	CYP2C8	Moderate	≥0.80
Lucid ganoderma	Ganolucidic Acid B	VDR	Moderate	≥0.80
Lucid ganoderma	Ganolucidic Acid B	CYP19A1	Moderate	≥0.80
Lucid ganoderma	Ganolucidic Acid B	CYP2C9	Moderate	≥0.80
Lucid ganoderma	Ganolucidic Acid B	CYP2B6	Moderate	≥0.80
Lucid ganoderma	Ganolucidic Acid B	CYP3A5	Moderate	≥0.80
Lucid ganoderma	Ganolucidic Acid B	MAOA	Moderate	≥0.80
Lucid ganoderma	Ganolucidic Acid B	CYP3A7	Moderate	≥0.80
Lucid ganoderma	Ganolucidic Acid B	CYP2C19	Moderate	≥0.80
Lucid ganoderma	Ganolucidic Acid B	RORA	Moderate	≥0.80
Lucid ganoderma	Ganolucidic Acid B	AKR1C2	Moderate	≥0.80
Lucid ganoderma	Ganolucidic Acid B	AKR1C1	Moderate	≥0.80
Lucid ganoderma	Ganolucidic Acid B	SLC10A1	Moderate	≥0.80
Lucid ganoderma	Ganolucidic Acid B	NR1I3	Moderate	≥0.80
Lucid ganoderma	Ganolucidic Acid B	NCOA2	Moderate	≥0.80
Lucid ganoderma	Ganolucidic Acid B	CYP1B1	Moderate	≥0.80
Lucid ganoderma	Ganolucidic Acid B	CYP2A13	Moderate	≥0.80
Lucid ganoderma	Ganolucidic Acid B	SLC10A6	Moderate	≥0.80
Lucid ganoderma	Ganolucidic Acid B	SLC22A8	Moderate	≥0.80
Lucid ganoderma	Ganolucidic Acid B	SLC22A4	Moderate	≥0.80
Lucid ganoderma	Ganolucidic Acid B	CYP3A43	Moderate	≥0.80
Lucid ganoderma	Ganolucidic Acid B	CLEC4E	Moderate	≥0.80
Lucid ganoderma	Ganolucidic Acid B	ABCG2	Moderate	≥0.80
Lucid ganoderma	Ganolucidic Acid B	SLC22A7	Moderate	≥0.80
Lucid ganoderma	Ganolucidic Acid B	HMGCR	Moderate	≥0.80
Lucid ganoderma	Ganolucidic Acid B	ANXA1	Moderate	≥0.80
Lucid ganoderma	Ganolucidic Acid B	ITGB2	Moderate	≥0.80
Lucid ganoderma	Ganolucidic Acid B	SERPINA6	Moderate	≥0.80
Lucid ganoderma	Ganolucidic Acid B	CYP2D6	Moderate	≥0.80
Lucid ganoderma	Ganolucidic Acid B	CYP2A6	Moderate	≥0.80
Lucid ganoderma	Ganolucidic Acid B	HSD3B1	Moderate	≥0.80
Lucid ganoderma	Ganolucidic Acid B	UGT2B7	Moderate	≥0.80
Lucid ganoderma	Ganolucidic Acid B	ITGAL	Moderate	≥0.80
Lucid ganoderma	Ganolucidic Acid B	UGT1A1	Moderate	≥0.80
Lucid ganoderma	Ganolucidic Acid B	HSD11B1	Moderate	≥0.80
Lucid ganoderma	Ganolucidic Acid B	UGT1A3	Moderate	≥0.80
Lucid ganoderma	Ganolucidic Acid B	ABCC2	Moderate	≥0.80
Lucid ganoderma	Ganolucidic Acid B	SLCO1B1	Moderate	≥0.80
Lucid ganoderma	Ganolucidic Acid B	IGHG2	Moderate	≥0.80
Lucid ganoderma	Ganolucidic Acid B	GC	Moderate	≥0.80
Lucid ganoderma	Ganolucidic Acid B	HOXA10	Moderate	≥0.80
Lucid ganoderma	Ganolucidic Acid B	CYP24A1	Moderate	≥0.80
Lucid ganoderma	Ganolucidic Acid B	SLCO2B1	Moderate	≥0.80
Lucid ganoderma	Ganolucidic Acid B	ABCB11	Moderate	≥0.80
Lucid ganoderma	Ganolucidic Acid B	CES1	Moderate	≥0.80
Lucid ganoderma	Ganolucidic Acid B	SLC16A1	Moderate	≥0.80
Lucid ganoderma	Ganolucidic Acid B	NCOA1	Moderate	≥0.80
Lucid ganoderma	Ganolucidic Acid B	SLC22A6	Moderate	≥0.80
Lucid ganoderma	Ganolucidic Acid B	SLCO1B3	Moderate	≥0.80
Lucid ganoderma	Ganolucidic Acid B	SLC22A11	Moderate	≥0.80
Lucid ganoderma	Ganolucidic Acid B	LSS	Moderate	≥0.80
Lucid ganoderma	Ganolucidic Acid B	CYP27B1	Moderate	≥0.80
Lucid ganoderma	Ganolucidic Acid B	ALOX5	Moderate	≥0.80
Lucid ganoderma	Ganolucidic Acid B	PTGS1	Moderate	≥0.80
Lucid ganoderma	Ganolucidic Acid B	NR1H4	Moderate	≥0.80
Lucid ganoderma	Ganolucidic Acid B	ABCC3	Moderate	≥0.80
Lucid ganoderma	Ganolucidic Acid B	ABCC4	Moderate	≥0.80
Lucid ganoderma	Ganolucidic Acid B	ADH1C	Moderate	≥0.80
Lucid ganoderma	Ganolucidic Acid B	COX1	Moderate	≥0.80
Lucid ganoderma	Ganolucidic Acid B	COX2	Moderate	≥0.80
Lucid ganoderma	Ganolucidic Acid B	PLA2G1B	Moderate	≥0.80
Lucid ganoderma	Ganolucidic Acid B	CYP2E1	Moderate	≥0.80
Lucid ganoderma	Ganolucidic Acid B	FABP1	Moderate	≥0.80
Lucid ganoderma	Ganolucidic Acid B	GSTP1	Moderate	≥0.80
Lucid ganoderma	Ganolucidic Acid B	COX6C	Moderate	≥0.80
Lucid ganoderma	Ganolucidic Acid B	COX8A	Moderate	≥0.80
Lucid ganoderma	Ganolucidic Acid B	COX5B	Moderate	≥0.80
Lucid ganoderma	Ganolucidic Acid B	COX4I1	Moderate	≥0.80
Lucid ganoderma	Ganolucidic Acid B	COX6B1	Moderate	≥0.80
Lucid ganoderma	Ganolucidic Acid B	COX7C	Moderate	≥0.80
Lucid ganoderma	Ganolucidic Acid B	COX5A	Moderate	≥0.80
Lucid ganoderma	Ganolucidic Acid B	FECH	Moderate	≥0.80
Lucid ganoderma	Ganolucidic Acid B	COX7A1	Moderate	≥0.80
Lucid ganoderma	Ganolucidic Acid B	COX7B	Moderate	≥0.80
Lucid ganoderma	Ganolucidic Acid B	ABCC1	Moderate	≥0.80
Lucid ganoderma	Ganolucidic Acid B	FABP6	Moderate	≥0.80
Lucid ganoderma	Ganolucidic Acid B	ESRRG	Moderate	≥0.80
Lucid ganoderma	Ganolucidic Acid B	COX6A2	Moderate	≥0.80
Lucid ganoderma	Ganolucidic Acid B	CYP27A1	Moderate	≥0.80
Lucid ganoderma	Ganolucidic Acid B	SLC10A2	Moderate	≥0.80
Lucid ganoderma	Ganolucidic Acid B	EFTUD1	Moderate	≥0.80
Lucid ganoderma	Ganosporeric Acid A	SULT2B1	Moderate	≥0.80
Lucid ganoderma	Ganosporeric Acid A	NR1I2	Moderate	≥0.80
Lucid ganoderma	Ganosporeric Acid A	ABCB1	Moderate	≥0.80
Lucid ganoderma	Ganosporeric Acid A	VDR	Moderate	≥0.80
Lucid ganoderma	Ganosporeric Acid A	RORA	Moderate	≥0.80
Lucid ganoderma	Ganosporeric Acid A	NR1I3	Moderate	≥0.80
Lucid ganoderma	Ganosporeric Acid A	SLC10A6	Moderate	≥0.80
Lucid ganoderma	Ganosporeric Acid A	CLEC4E	Moderate	≥0.80
Lucid ganoderma	Ganosporeric Acid A	ABCG2	Moderate	≥0.80
Lucid ganoderma	Ganosporeric Acid A	IGHG2	Moderate	≥0.80
Lucid ganoderma	Ganosporeric Acid A	NR3C1	Moderate	≥0.80
Lucid ganoderma	Ganosporeric Acid A	SERPINA6	Moderate	≥0.80
Lucid ganoderma	Ganosporeric Acid A	AR	Moderate	≥0.80
Lucid ganoderma	Ganosporeric Acid A	CYP19A1	Moderate	≥0.80
Lucid ganoderma	Ganosporeric Acid A	MAOA	Moderate	≥0.80
Lucid ganoderma	Ganosporeric Acid A	MAOB	Moderate	≥0.80
Lucid ganoderma	Ganosporeric Acid A	HSD11B2	Moderate	≥0.80
Lucid ganoderma	Ganosporeric Acid A	ALB	Moderate	≥0.80
Lucid ganoderma	Ganosporeric Acid A	ESR1	Moderate	≥0.80
Lucid ganoderma	Ganosporeric Acid A	SHBG	Moderate	≥0.80
Lucid ganoderma	Ganosporeric Acid A	PGR	Moderate	≥0.80
Lucid ganoderma	Ganosporeric Acid A	CYP3A4	Moderate	≥0.80
Lucid ganoderma	Ganosporeric Acid A	ALOX5	Moderate	≥0.80
Lucid ganoderma	Ganosporeric Acid A	SRD5A1	Moderate	≥0.80
Lucid ganoderma	Ganosporeric Acid A	COMT	Moderate	≥0.80
Lucid ganoderma	Ganosporeric Acid A	UGT1A1	Moderate	≥0.80
Lucid ganoderma	Ganosporeric Acid A	PTGS1	Moderate	≥0.80
Lucid ganoderma	Ganosporeric Acid A	SRD5A2	Moderate	≥0.80
Lucid ganoderma	Ganosporeric Acid A	ABCC2	Moderate	≥0.80
Lucid ganoderma	Ganosporeric Acid A	SRD5A3	Moderate	≥0.80
Lucid ganoderma	Ganosporeric Acid A	SLCO1B1	Moderate	≥0.80
Lucid ganoderma	Ganosporeric Acid A	ABCB11	Moderate	≥0.80
Lucid ganoderma	Ganosporeric Acid A	HSD11B1	Moderate	≥0.80
Lucid ganoderma	Ganosporeric Acid A	CYP2C8	Moderate	≥0.80
Lucid ganoderma	Ganosporeric Acid A	CYP2C9	Moderate	≥0.80
Lucid ganoderma	Ganosporeric Acid A	HSD3B2	Moderate	≥0.80
Lucid ganoderma	Ganosporeric Acid A	NR3C2	Moderate	≥0.80
Lucid ganoderma	Lucidenic Acid A	SLCO2B1	Good	≥0.80
Lucid ganoderma	Lucidenic Acid A	ABCB11	Good	≥0.80
Lucid ganoderma	Lucidenic Acid A	HMGCR	Good	≥0.80
Lucid ganoderma	Lucidenic Acid A	ABCB1	Good	≥0.80
Lucid ganoderma	Lucidenic Acid A	NR3C2	Good	≥0.80
Lucid ganoderma	Lucidenic Acid A	CYP3A4	Good	≥0.80
Lucid ganoderma	Lucidenic Acid A	CYP2C8	Good	≥0.80
Lucid ganoderma	Lucidenic Acid A	CYP2D6	Good	≥0.80
Lucid ganoderma	Lucidenic Acid A	CYP2C9	Good	≥0.80
Lucid ganoderma	Lucidenic Acid A	CYP3A5	Good	≥0.80
Lucid ganoderma	Lucidenic Acid A	CES1	Good	≥0.80
Lucid ganoderma	Lucidenic Acid A	HSD11B1	Good	≥0.80
Lucid ganoderma	Lucidenic Acid A	SLCO1A2	Good	≥0.80
Lucid ganoderma	Lucidenic Acid A	SLC16A1	Good	≥0.80
Lucid ganoderma	Lucidenic Acid A	NCOA1	Good	≥0.80
Lucid ganoderma	Lucidenic Acid A	SLC22A6	Good	≥0.80
Lucid ganoderma	Lucidenic Acid A	SLC22A8	Good	≥0.80
Lucid ganoderma	Lucidenic Acid A	ABCC2	Good	≥0.80
Lucid ganoderma	Lucidenic Acid A	SLCO1B3	Good	≥0.80
Lucid ganoderma	Lucidenic Acid A	SLC22A11	Good	≥0.80
Lucid ganoderma	Lucidenic Acid A	ABCG2	Good	≥0.80
Lucid ganoderma	Lucidenic Acid A	SLC22A7	Good	≥0.80
Lucid ganoderma	Lucidenic Acid A	SLCO1B1	Good	≥0.80
Lucid ganoderma	Lucidenic Acid A	SULT2B1	Good	≥0.80
Lucid ganoderma	Lucidenic Acid A	GABRP	Good	≥0.80
Lucid ganoderma	Lucidenic Acid A	GABRD	Good	≥0.80
Lucid ganoderma	Lucidenic Acid A	GRIN2D	Good	≥0.80
Lucid ganoderma	Lucidenic Acid A	GRIN3B	Good	≥0.80
Lucid ganoderma	Lucidenic Acid A	NR1I2	Good	≥0.80
Lucid ganoderma	Lucidenic Acid A	ESR1	Good	≥0.80
Lucid ganoderma	Lucidenic Acid A	AR	Good	≥0.80
Lucid ganoderma	Lucidenic Acid A	HSD17B1	Good	≥0.80
Lucid ganoderma	Lucidenic Acid A	GABRA1	Good	≥0.80
Lucid ganoderma	Lucidenic Acid A	GABRB1	Good	≥0.80
Lucid ganoderma	Lucidenic Acid A	GABRG2	Good	≥0.80
Lucid ganoderma	Lucidenic Acid A	CYP3A7	Good	≥0.80
Lucid ganoderma	Lucidenic Acid A	GABRB3	Good	≥0.80
Lucid ganoderma	Lucidenic Acid A	GABRA5	Good	≥0.80
Lucid ganoderma	Lucidenic Acid A	GABRA3	Good	≥0.80
Lucid ganoderma	Lucidenic Acid A	GABRA2	Good	≥0.80
Lucid ganoderma	Lucidenic Acid A	GABRB2	Good	≥0.80
Lucid ganoderma	Lucidenic Acid A	GABRA4	Good	≥0.80
Lucid ganoderma	Lucidenic Acid A	GABRE	Good	≥0.80
Lucid ganoderma	Lucidenic Acid A	GRIN1	Good	≥0.80
Lucid ganoderma	Lucidenic Acid A	SULT2A1	Good	≥0.80
Lucid ganoderma	Lucidenic Acid A	PPARA	Good	≥0.80
Lucid ganoderma	Lucidenic Acid A	GRIN2A	Good	≥0.80
Lucid ganoderma	Lucidenic Acid A	GRIN2B	Good	≥0.80
Lucid ganoderma	Lucidenic Acid A	GRIN2C	Good	≥0.80
Lucid ganoderma	Lucidenic Acid A	NR1I3	Good	≥0.80
Lucid ganoderma	Lucidenic Acid A	GABRA6	Good	≥0.80
Lucid ganoderma	Lucidenic Acid A	GABRG1	Good	≥0.80
Lucid ganoderma	Lucidenic Acid A	GRIN3A	Good	≥0.80
Lucid ganoderma	Lucidenic Acid A	ESR2	Good	≥0.80
Lucid ganoderma	Lucidenic Acid A	SIGMAR1	Good	≥0.80
Lucid ganoderma	Lucidenic Acid A	GABRG3	Good	≥0.80
Lucid ganoderma	Lucidenic Acid A	GABRQ	Good	≥0.80
Lucid ganoderma	Lucidenic Acid A	NR3C1	Good	≥0.80
Lucid ganoderma	Lucidenic Acid A	SERPINA6	Good	≥0.80
Lucid ganoderma	Lucidenic Acid A	ALB	Good	≥0.80
Lucid ganoderma	Lucidenic Acid A	SHBG	Good	≥0.80
Lucid ganoderma	Lucidenic Acid A	CYP19A1	Good	≥0.80
Lucid ganoderma	Lucidenic Acid A	CYP2B6	Good	≥0.80
Lucid ganoderma	Lucidenic Acid A	LSS	Good	≥0.80
Lucid ganoderma	Lucidenic Acid A	PGR	Good	≥0.80
Lucid ganoderma	Lucidenic Acid A	CYP27B1	Good	≥0.80
Lucid ganoderma	Lucidenic Acid A	ALOX5	Good	≥0.80
Lucid ganoderma	Lucidenic Acid A	VDR	Good	≥0.80
Lucid ganoderma	Lucidenic Acid A	SRD5A1	Good	≥0.80
Lucid ganoderma	Lucidenic Acid A	COMT	Good	≥0.80
Lucid ganoderma	Lucidenic Acid A	UGT1A1	Good	≥0.80
Lucid ganoderma	Lucidenic Acid A	PTGS1	Good	≥0.80
Lucid ganoderma	Lucidenic Acid A	HSD3B2	Good	≥0.80
Lucid ganoderma	Lucidenic Acid A	SRD5A2	Good	≥0.80
Lucid ganoderma	Lucidenic Acid A	CYP24A1	Good	≥0.80
Lucid ganoderma	Lucidenic Acid A	SRD5A3	Good	≥0.80
Lucid ganoderma	Lucidenic Acid A	NR1H4	Good	≥0.80
Lucid ganoderma	Lucidenic Acid A	RORA	Good	≥0.80
Lucid ganoderma	Lucidenic Acid A	SLC10A6	Good	≥0.80
Lucid ganoderma	Lucidenic Acid A	CLEC4E	Good	≥0.80
Lucid ganoderma	Lucidenic Acid A	ABCC3	Good	≥0.80
Lucid ganoderma	Lucidenic Acid A	ABCC4	Good	≥0.80
Lucid ganoderma	Lucidenic Acid A	ADH1C	Good	≥0.80
Lucid ganoderma	Lucidenic Acid A	COX1	Good	≥0.80
Lucid ganoderma	Lucidenic Acid A	COX2	Good	≥0.80
Lucid ganoderma	Lucidenic Acid A	IGHG2	Good	≥0.80
Lucid ganoderma	Lucidenic Acid A	PLA2G1B	Good	≥0.80
Lucid ganoderma	Lucidenic Acid A	CYP2E1	Good	≥0.80
Lucid ganoderma	Lucidenic Acid A	FABP1	Good	≥0.80
Lucid ganoderma	Lucidenic Acid A	GSTP1	Good	≥0.80
Lucid ganoderma	Lucidenic Acid A	COX6C	Good	≥0.80
Lucid ganoderma	Lucidenic Acid A	COX8A	Good	≥0.80
Lucid ganoderma	Lucidenic Acid A	COX5B	Good	≥0.80
Lucid ganoderma	Lucidenic Acid A	COX4I1	Good	≥0.80
Lucid ganoderma	Lucidenic Acid A	COX6B1	Good	≥0.80
Lucid ganoderma	Lucidenic Acid A	COX7C	Good	≥0.80
Lucid ganoderma	Lucidenic Acid A	UGT2B7	Good	≥0.80
Lucid ganoderma	Lucidenic Acid A	COX5A	Good	≥0.80
Lucid ganoderma	Lucidenic Acid A	FECH	Good	≥0.80
Lucid ganoderma	Lucidenic Acid A	COX7A1	Good	≥0.80
Lucid ganoderma	Lucidenic Acid A	COX7B	Good	≥0.80
Lucid ganoderma	Lucidenic Acid A	ABCC1	Good	≥0.80
Lucid ganoderma	Lucidenic Acid A	FABP6	Good	≥0.80
Lucid ganoderma	Lucidenic Acid A	AKR1C2	Good	≥0.80
Lucid ganoderma	Lucidenic Acid A	ESRRG	Good	≥0.80
Lucid ganoderma	Lucidenic Acid A	COX6A2	Good	≥0.80
Lucid ganoderma	Lucidenic Acid A	CYP27A1	Good	≥0.80
Lucid ganoderma	Lucidenic Acid A	SLC10A2	Good	≥0.80
Lucid ganoderma	Lucidenic Acid A	SLC10A1	Good	≥0.80
Lucid ganoderma	Lucidenic Acid A	EFTUD1	Good	≥0.80
Lucid ganoderma	Lucidenic Acid A	HSD11B2	Good	≥0.80
Lucid ganoderma	Lucidenic Acid A	GC	Good	≥0.80
Lucid ganoderma	Lucidenic Acid A	HOXA10	Good	≥0.80
Lucid ganoderma	Lucidenic Acid B	NR3C1	Good	≥0.80
Lucid ganoderma	Lucidenic Acid B	SERPINA6	Good	≥0.80
Lucid ganoderma	Lucidenic Acid B	GC	Good	≥0.80
Lucid ganoderma	Lucidenic Acid B	CYP3A4	Good	≥0.80
Lucid ganoderma	Lucidenic Acid B	VDR	Good	≥0.80
Lucid ganoderma	Lucidenic Acid B	HOXA10	Good	≥0.80
Lucid ganoderma	Lucidenic Acid B	CYP24A1	Good	≥0.80
Lucid ganoderma	Lucidenic Acid B	SLCO2B1	Good	≥0.80
Lucid ganoderma	Lucidenic Acid B	ABCB11	Good	≥0.80
Lucid ganoderma	Lucidenic Acid B	HMGCR	Good	≥0.80
Lucid ganoderma	Lucidenic Acid B	ABCB1	Good	≥0.80
Lucid ganoderma	Lucidenic Acid B	CYP2C8	Good	≥0.80
Lucid ganoderma	Lucidenic Acid B	CYP2D6	Good	≥0.80
Lucid ganoderma	Lucidenic Acid B	CYP2C9	Good	≥0.80
Lucid ganoderma	Lucidenic Acid B	CYP3A5	Good	≥0.80
Lucid ganoderma	Lucidenic Acid B	CES1	Good	≥0.80
Lucid ganoderma	Lucidenic Acid B	SLCO1A2	Good	≥0.80
Lucid ganoderma	Lucidenic Acid B	SLC16A1	Good	≥0.80
Lucid ganoderma	Lucidenic Acid B	SLC22A6	Good	≥0.80
Lucid ganoderma	Lucidenic Acid B	SLC22A8	Good	≥0.80
Lucid ganoderma	Lucidenic Acid B	ABCC2	Good	≥0.80
Lucid ganoderma	Lucidenic Acid B	SLCO1B3	Good	≥0.80
Lucid ganoderma	Lucidenic Acid B	SLC22A11	Good	≥0.80
Lucid ganoderma	Lucidenic Acid B	ABCG2	Good	≥0.80
Lucid ganoderma	Lucidenic Acid B	SLC22A7	Good	≥0.80
Lucid ganoderma	Lucidenic Acid B	SLCO1B1	Good	≥0.80
Lucid ganoderma	Lucidenic Acid B	ALB	Good	≥0.80
Lucid ganoderma	Lucidenic Acid B	ESR1	Good	≥0.80
Lucid ganoderma	Lucidenic Acid B	SHBG	Good	≥0.80
Lucid ganoderma	Lucidenic Acid B	AR	Good	≥0.80
Lucid ganoderma	Lucidenic Acid B	CYP19A1	Good	≥0.80
Lucid ganoderma	Lucidenic Acid B	CYP2B6	Good	≥0.80
Lucid ganoderma	Lucidenic Acid B	LSS	Good	≥0.80
Lucid ganoderma	Lucidenic Acid B	CYP27B1	Good	≥0.80
Lucid ganoderma	Lucidenic Acid B	NR1I2	Good	≥0.80
Lucid ganoderma	Lucidenic Acid B	PGR	Good	≥0.80
Lucid ganoderma	Lucidenic Acid B	ALOX5	Good	≥0.80
Lucid ganoderma	Lucidenic Acid B	PTGS1	Good	≥0.80
Lucid ganoderma	Lucidenic Acid B	HSD3B2	Good	≥0.80
Lucid ganoderma	Lucidenic Acid B	NCOA1	Good	≥0.80
Lucid ganoderma	Lucidenic Acid B	NR1H4	Good	≥0.80
Lucid ganoderma	Lucidenic Acid B	SLC22A5	Good	≥0.80
Lucid ganoderma	Lucidenic Acid B	CYP17A1	Good	≥0.80
Lucid ganoderma	Lucidenic Acid B	NR3C2	Good	≥0.80
Lucid ganoderma	Lucidenic Acid B	CYP11B1	Good	≥0.80
Lucid ganoderma	Lucidenic Acid B	CYP11B2	Good	≥0.80
Lucid ganoderma	Lucidenic Acid B	ANXA1	Good	≥0.80
Lucid ganoderma	Lucidenic Acid B	CYP2A6	Good	≥0.80
Lucid ganoderma	Lucidenic Acid B	HSD3B1	Good	≥0.80
Lucid ganoderma	Lucidenic Acid B	CYP3A7	Good	≥0.80
Lucid ganoderma	Lucidenic Acid B	HSD11B1	Good	≥0.80
Lucid ganoderma	Lucidenic Acid B	CYP2C19	Good	≥0.80
Lucid ganoderma	Lucidenic Acid B	HSD11B2	Good	≥0.80
Lucid ganoderma	Lucidenic Acid B	ABCC3	Good	≥0.80
Lucid ganoderma	Lucidenic Acid B	ABCC4	Good	≥0.80
Lucid ganoderma	Lucidenic Acid B	ADH1C	Good	≥0.80
Lucid ganoderma	Lucidenic Acid B	COX1	Good	≥0.80
Lucid ganoderma	Lucidenic Acid B	COX2	Good	≥0.80
Lucid ganoderma	Lucidenic Acid B	PLA2G1B	Good	≥0.80
Lucid ganoderma	Lucidenic Acid B	CYP2E1	Good	≥0.80
Lucid ganoderma	Lucidenic Acid B	FABP1	Good	≥0.80
Lucid ganoderma	Lucidenic Acid B	GSTP1	Good	≥0.80
Lucid ganoderma	Lucidenic Acid B	COX6C	Good	≥0.80
Lucid ganoderma	Lucidenic Acid B	COX8A	Good	≥0.80
Lucid ganoderma	Lucidenic Acid B	COX5B	Good	≥0.80
Lucid ganoderma	Lucidenic Acid B	COX4I1	Good	≥0.80
Lucid ganoderma	Lucidenic Acid B	COX6B1	Good	≥0.80
Lucid ganoderma	Lucidenic Acid B	COX7C	Good	≥0.80
Lucid ganoderma	Lucidenic Acid B	UGT2B7	Good	≥0.80
Lucid ganoderma	Lucidenic Acid B	COX5A	Good	≥0.80
Lucid ganoderma	Lucidenic Acid B	FECH	Good	≥0.80
Lucid ganoderma	Lucidenic Acid B	COX7A1	Good	≥0.80
Lucid ganoderma	Lucidenic Acid B	COX7B	Good	≥0.80
Lucid ganoderma	Lucidenic Acid B	ABCC1	Good	≥0.80
Lucid ganoderma	Lucidenic Acid B	FABP6	Good	≥0.80
Lucid ganoderma	Lucidenic Acid B	AKR1C2	Good	≥0.80
Lucid ganoderma	Lucidenic Acid B	ESRRG	Good	≥0.80
Lucid ganoderma	Lucidenic Acid B	COX6A2	Good	≥0.80
Lucid ganoderma	Lucidenic Acid B	CYP27A1	Good	≥0.80
Lucid ganoderma	Lucidenic Acid B	SLC10A2	Good	≥0.80
Lucid ganoderma	Lucidenic Acid B	SLC10A1	Good	≥0.80
Lucid ganoderma	Lucidenic Acid B	EFTUD1	Good	≥0.80
Lucid ganoderma	Lucidenic Acid B	IGHG2	Good	≥0.80
Lucid ganoderma	Lucidenic Acid B	IL1B	Good	≥0.80
Lucid ganoderma	Lucidenic Acid D1	NR3C2	Moderate	≥0.80
Lucid ganoderma	Lucidenic Acid D1	HSD11B1	Moderate	≥0.80
Lucid ganoderma	Lucidenic Acid D1	NCOA1	Moderate	≥0.80
Lucid ganoderma	Lucidenic Acid D1	SULT2B1	Moderate	≥0.80
Lucid ganoderma	Lucidenic Acid D1	GABRP	Moderate	≥0.80
Lucid ganoderma	Lucidenic Acid D1	GABRD	Moderate	≥0.80
Lucid ganoderma	Lucidenic Acid D1	GRIN2D	Moderate	≥0.80
Lucid ganoderma	Lucidenic Acid D1	GRIN3B	Moderate	≥0.80
Lucid ganoderma	Lucidenic Acid D1	NR1I2	Moderate	≥0.80
Lucid ganoderma	Lucidenic Acid D1	ESR1	Moderate	≥0.80
Lucid ganoderma	Lucidenic Acid D1	CYP3A4	Moderate	≥0.80
Lucid ganoderma	Lucidenic Acid D1	AR	Moderate	≥0.80
Lucid ganoderma	Lucidenic Acid D1	HSD17B1	Moderate	≥0.80
Lucid ganoderma	Lucidenic Acid D1	GABRA1	Moderate	≥0.80
Lucid ganoderma	Lucidenic Acid D1	GABRB1	Moderate	≥0.80
Lucid ganoderma	Lucidenic Acid D1	GABRG2	Moderate	≥0.80
Lucid ganoderma	Lucidenic Acid D1	CYP3A7	Moderate	≥0.80
Lucid ganoderma	Lucidenic Acid D1	GABRB3	Moderate	≥0.80
Lucid ganoderma	Lucidenic Acid D1	GABRA5	Moderate	≥0.80
Lucid ganoderma	Lucidenic Acid D1	GABRA3	Moderate	≥0.80
Lucid ganoderma	Lucidenic Acid D1	GABRA2	Moderate	≥0.80
Lucid ganoderma	Lucidenic Acid D1	GABRB2	Moderate	≥0.80
Lucid ganoderma	Lucidenic Acid D1	GABRA4	Moderate	≥0.80
Lucid ganoderma	Lucidenic Acid D1	GABRE	Moderate	≥0.80
Lucid ganoderma	Lucidenic Acid D1	GRIN1	Moderate	≥0.80
Lucid ganoderma	Lucidenic Acid D1	SULT2A1	Moderate	≥0.80
Lucid ganoderma	Lucidenic Acid D1	PPARA	Moderate	≥0.80
Lucid ganoderma	Lucidenic Acid D1	GRIN2A	Moderate	≥0.80
Lucid ganoderma	Lucidenic Acid D1	GRIN2B	Moderate	≥0.80
Lucid ganoderma	Lucidenic Acid D1	GRIN2C	Moderate	≥0.80
Lucid ganoderma	Lucidenic Acid D1	NR1I3	Moderate	≥0.80
Lucid ganoderma	Lucidenic Acid D1	GABRA6	Moderate	≥0.80
Lucid ganoderma	Lucidenic Acid D1	GABRG1	Moderate	≥0.80
Lucid ganoderma	Lucidenic Acid D1	GRIN3A	Moderate	≥0.80
Lucid ganoderma	Lucidenic Acid D1	ESR2	Moderate	≥0.80
Lucid ganoderma	Lucidenic Acid D1	SIGMAR1	Moderate	≥0.80
Lucid ganoderma	Lucidenic Acid D1	GABRG3	Moderate	≥0.80
Lucid ganoderma	Lucidenic Acid D1	GABRQ	Moderate	≥0.80
Lucid ganoderma	Lucidenic Acid D1	NR3C1	Moderate	≥0.80
Lucid ganoderma	Lucidenic Acid D1	SERPINA6	Moderate	≥0.80
[truncated: 3,719 more rows]

## Sheet: Table S3
Table S3 Information of potential targets from active ingredients of the LQHBG
Gene	Protein Name
VDR	vitamin D receptor
SERPINE1	serpin family E member 1
PRKCD	protein kinase C delta
PTGS2	prostaglandin-endoperoxide synthase 2
ALOX15	arachidonate 15-lipoxygenase
ALDH2	aldehyde dehydrogenase 2 family member
CTSD	cathepsin D
KDR	kinase insert domain receptor
AKR1A1	aldo-keto reductase family 1 member A1
SOD1	superoxide dismutase 1
IL6	interleukin 6
AKR1B1	aldo-keto reductase family 1 member B
SDHB	succinate dehydrogenase complex iron sulfur subunit B
PON1	paraoxonase 1
COX2	cytochrome c oxidase subunit II
VCAM1	vascular cell adhesion molecule 1
NOS2	nitric oxide synthase 2
PLG	plasminogen
SELE	selectin E
TLR4	toll like receptor 4
MMP14	matrix metallopeptidase 14
GCK	glucokinase
HRAS	HRas proto-oncogene, GTPase
TNF	tumor necrosis factor
ATM	ATM serine/threonine kinase
HCAR2	hydroxycarboxylic acid receptor 2
MMP9	matrix metallopeptidase 9
PPARG	peroxisome proliferator activated receptor gamma
RBP3	retinol binding protein 3
MMP3	matrix metallopeptidase 3
NOS3	nitric oxide synthase 3
FLT4	fms related receptor tyrosine kinase 4
GLO1	glyoxalase I
INSR	insulin receptor
MTHFR	methylenetetrahydrofolate reductase
PTPN6	protein tyrosine phosphatase non-receptor type 6
ITGA4	integrin subunit alpha 4
NFKB1	nuclear factor kappa B subunit 1
NOS1	nitric oxide synthase 1
GAPDH	glyceraldehyde-3-phosphate dehydrogenase
GSTM1	glutathione S-transferase mu 1
RCVRN	recoverin
BDKRB2	bradykinin receptor B2
ADRB3	adrenoceptor beta 3
FAAH	fatty acid amide hydrolase
KCNJ11	potassium inwardly rectifying channel subfamily J member 11
HBB	hemoglobin subunit beta
ABCC8	ATP binding cassette subfamily C member 8
CYP2C19	cytochrome P450 family 2 subfamily C member 19
MMP2	matrix metallopeptidase 2
MAPK3	mitogen-activated protein kinase 3
CASP3	caspase 3
RAF1	Raf-1 proto-oncogene, serine/threonine kinase
ACE	angiotensin I converting enzyme
RBP4	retinol binding protein 4
MAPK14	mitogen-activated protein kinase 14
REN	renin
IGF1R	insulin like growth factor 1 receptor
MME	membrane metalloendopeptidase
SERPINA6	serpin family A member 6
PTPN1	protein tyrosine phosphatase non-receptor type 1
AVPR2	arginine vasopressin receptor 2
EPHX2	epoxide hydrolase 2
HIF1A	hypoxia inducible factor 1 subunit alpha
CA1	carbonic anhydrase 1
CCR2	C-C motif chemokine receptor 2
ICAM1	intercellular adhesion molecule 1
CNR1	cannabinoid receptor 1
PPARA	peroxisome proliferator activated receptor alpha
SELP	selectin P
SLC2A1	solute carrier family 2 member 1
ALB	albumin
RHO	rhodopsin
INS	insulin
AKR1B10	aldo-keto reductase family 1 member B10
MMP10	matrix metallopeptidase 10
GLUL	glutamate-ammonia ligase
AGTR1	angiotensin II receptor type 1
KDM1A	lysine demethylase 1A
EP300	E1A binding protein p300
FLT1	fms related receptor tyrosine kinase 1
F2	coagulation factor II, thrombin
C5AR1	complement C5a receptor 1
SELL	selectin L
PER2	period circadian regulator 2
BDKRB1	bradykinin receptor B1

## Sheet: Table S4
Table S4 Potential targets of bioactive components in Lingqihuangban Granule for treating DR
Herb	Bioactive component	Gene name
Cistanche	beta-sitosterol	CYP2C19
Cistanche	beta-sitosterol	PTPN1
Cistanche	beta-sitosterol	SERPINA6
Cistanche	beta-sitosterol	VDR
Cistanche	beta-sitosterol	PPARA
Cistanche	beta-sitosterol	PTPN6
Cistanche	beta-sitosterol	NOS2
Cistanche	beta-sitosterol	PPARG
Cistanche	arachidonate	PPARG
Cistanche	arachidonate	PPARA
Cistanche	arachidonate	CNR1
Cistanche	arachidonate	FAAH
Cistanche	arachidonate	PTPN1
Cistanche	arachidonate	ALOX15
Cistanche	arachidonate	AKR1B10
Cistanche	arachidonate	NOS2
Cistanche	arachidonate	PTPN6
Cistanche	arachidonate	MMP3
Cistanche	arachidonate	RBP4
Cistanche	arachidonate	ACE
Cistanche	arachidonate	KEAP1
Cistanche	arachidonate	MMP9
Cistanche	arachidonate	MMP2
Cistanche	arachidonate	AGTR1
Cistanche	suchilactone	NOS1
Cistanche	suchilactone	NOS3
Cistanche	suchilactone	FLT1
Cistanche	suchilactone	FLT4
Cistanche	suchilactone	IGF1R
Cistanche	suchilactone	RAF1
Cistanche	suchilactone	FAAH
Cistanche	suchilactone	GCK
Cistanche	suchilactone	TGFB1
Cistanche	Yangambin	HIF1A
Cistanche	Yangambin	ALOX15
Cistanche	quercetin	AVPR2
Cistanche	quercetin	AKR1B1
Cistanche	quercetin	IGF1R
Cistanche	quercetin	F2
Cistanche	quercetin	GLO1
Cistanche	quercetin	CA1
Cistanche	quercetin	KDR
Cistanche	quercetin	MMP3
Cistanche	quercetin	ALOX15
Cistanche	quercetin	MMP9
Cistanche	quercetin	MMP2
Cistanche	quercetin	AKR1A1
Cistanche	quercetin	INSR
Cistanche	quercetin	AKR1B10
Cistanche	succinic Acid	HBB
Cistanche	succinic Acid	SDHB
Lucid ganoderma	Ganoderic acid Mf	VDR
Lucid ganoderma	Ganoderic acid Mf	PPARG
Lucid ganoderma	Ganoderic acid Mf	NOS2
Lucid ganoderma	Ganoderic acid Mf	PTPN1
Lucid ganoderma	Ganoderic acid Mf	AGTR1
Lucid ganoderma	Ganoderic acid Mf	CTSD
Lucid ganoderma	Ganoderic acid Mf	ACE
Lucid ganoderma	Methyl lucidenate F	NOS2
Lucid ganoderma	Methyl lucidenate F	MAPK3
Lucid ganoderma	Methyl lucidenate F	TNF
Lucid ganoderma	Methyl lucidenate F	PTPN1
Lucid ganoderma	Methyl lucidenate F	PTGS2
Lucid ganoderma	Methyl lucidenate F	CYP2C19
Lucid ganoderma	Methyl lucidenate F	MAPK14
Lucid ganoderma	Methyl lucidenate F	INSR
Lucid ganoderma	Methyl lucidenate F	AKR1B10
Lucid ganoderma	Methyl lucidenate F	MMP3
Lucid ganoderma	Methyl lucidenate F	MMP9
Lucid ganoderma	Methyl lucidenate F	AKR1B1
Lucid ganoderma	Methyl lucidenate F	REN
Lucid ganoderma	Stellasterol	PTPN1
Lucid ganoderma	Stellasterol	CYP2C19
Lucid ganoderma	epoxyganoderiol A	FAAH
Lucid ganoderma	epoxyganoderiol A	CNR1
Lucid ganoderma	epoxyganoderiol A	PTPN1
Lucid ganoderma	epoxyganoderiol A	NOS2
Lucid ganoderma	epoxyganoderiol A	MAPK14
Lucid ganoderma	epoxyganoderiol A	INSR
Lucid ganoderma	epoxyganoderiol A	TNF
Lucid ganoderma	epoxyganoderiol B	C5AR1
Lucid ganoderma	epoxyganoderiol B	PTPN1
Lucid ganoderma	epoxyganoderiol B	CA1
Lucid ganoderma	epoxyganoderiol B	MAPK14
Lucid ganoderma	epoxyganoderiol B	TNF
Lucid ganoderma	epoxyganoderiol B	CNR1
Lucid ganoderma	epoxyganoderiol B	AGTR1
Lucid ganoderma	epoxyganoderiol B	REN
Lucid ganoderma	epoxyganoderiol B	PRKCD
Lucid ganoderma	epoxyganoderiol C	CNR1
Lucid ganoderma	epoxyganoderiol C	VDR
Lucid ganoderma	epoxyganoderiol C	PTPN1
Lucid ganoderma	epoxyganoderiol C	REN
Lucid ganoderma	epoxyganoderiol C	KDR
Lucid ganoderma	epoxyganoderiol C	IGF1R
Lucid ganoderma	epoxyganoderiol C	CA1
Lucid ganoderma	epoxyganoderiol C	MMP2
Lucid ganoderma	Ergosta-7,22-dien-3beta-yl palmitate	PTPN1
Lucid ganoderma	Ergosta-7,22-dien-3beta-yl palmitate	CYP2C19
Lucid ganoderma	Ergosta-7,22-dien-3beta-yl palmitate	PTGS2
Lucid ganoderma	Ergosta-7,22-dien-3beta-yl palmitate	FAAH
Lucid ganoderma	Ergosta-7,22-dien-3beta-yl palmitate	F2
Lucid ganoderma	Ergosta-7,22-dien-3beta-yl palmitate	CNR1
Lucid ganoderma	Ergosta-7,22-dien-3beta-yl palmitate	NOS2
Lucid ganoderma	Ergosta-7,22-dien-3beta-yl palmitate	PRKCD
Lucid ganoderma	Ergosta-7,22-dien-3beta-yl palmitate	SERPINA6
Lucid ganoderma	Ergosta-7,22-dien-3beta-yl palmitate	VDR
Lucid ganoderma	Ergosta-7,22-dien-3beta-yl palmitate	PTPN6
Lucid ganoderma	Ergosta-7,22-dien-3beta-yl palmitate	HIF1A
Lucid ganoderma	Peroxyergosterol	NOS2
Lucid ganoderma	Peroxyergosterol	CNR1
Lucid ganoderma	Peroxyergosterol	PRKCD
Lucid ganoderma	Peroxyergosterol	MAPK14
Lucid ganoderma	ganoderal B	NOS2
Lucid ganoderma	ganoderal B	AKR1B10
Lucid ganoderma	ganoderal B	TNF
Lucid ganoderma	ganoderal B	PTPN1
Lucid ganoderma	ganoderal B	MAPK3
Lucid ganoderma	ganoderal B	SERPINA6
Lucid ganoderma	ganoderal B	PPARG
Lucid ganoderma	ganoderal B	GLUL
Lucid ganoderma	ganoderal B	AVPR2
Lucid ganoderma	ganoderal B	IL6
Lucid ganoderma	ganoderal B	PPARA
Lucid ganoderma	ganoderal B	KDR
Lucid ganoderma	ganoderal B	REN
Lucid ganoderma	ganoderal B	PTGS2
Lucid ganoderma	ganoderal B	FAAH
Lucid ganoderma	Ganoderic acid beta	TNF
Lucid ganoderma	Ganoderic acid beta	NOS2
Lucid ganoderma	Ganoderic acid beta	SERPINA6
Lucid ganoderma	Ganoderic acid beta	AKR1B10
Lucid ganoderma	Ganoderic acid beta	PTPN1
Lucid ganoderma	Ganoderic acid beta	MAPK3
Lucid ganoderma	Ganoderic acid beta	MME
Lucid ganoderma	Ganoderic acid beta	MMP3
Lucid ganoderma	Ganoderic acid beta	MMP2
Lucid ganoderma	Ganoderic acid beta	PPARG
Lucid ganoderma	Ganoderic acid beta	PPARA
Lucid ganoderma	Ganoderic acid beta	MMP9
Lucid ganoderma	Ganoderic acid beta	MMP10
Lucid ganoderma	Ganoderic acid DM	NOS2
Lucid ganoderma	Ganoderic acid DM	PTPN1
Lucid ganoderma	Ganoderic acid DM	SERPINA6
Lucid ganoderma	Ganoderic acid DM	MAPK3
Lucid ganoderma	Ganoderic acid DM	TNF
Lucid ganoderma	Ganoderic acid DM	AKR1B10
Lucid ganoderma	Ganoderic acid DM	PPARG
Lucid ganoderma	Ganoderic acid DM	AVPR2
Lucid ganoderma	Ganoderic acid DM	AGTR1
Lucid ganoderma	Ganoderic acid DM	PTPN6
Lucid ganoderma	Ganoderic acid DM	MMP3
Lucid ganoderma	Ganoderic acid DM	MMP2
Lucid ganoderma	Ganoderic acid DM	ABCC8
Lucid ganoderma	Ganoderic acid DM	PPARA
Lucid ganoderma	Ganoderic acid DM	ITGA4
Lucid ganoderma	Ganoderic acid TR	PTPN1
Lucid ganoderma	Ganoderic acid TR	NOS2
Lucid ganoderma	Ganoderic acid TR	TNF
Lucid ganoderma	Ganoderic acid TR	PPARG
Lucid ganoderma	Ganoderic acid TR	PPARA
Lucid ganoderma	Ganoderic acid TR	VDR
Lucid ganoderma	Ganoderic acid TR	AKR1B10
Lucid ganoderma	Ganoderic acid TR	AGTR1
Lucid ganoderma	Ganoderic acid TR	SERPINA6
Lucid ganoderma	Ganoderic acid TR	ACE
Lucid ganoderma	Ganoderic acid TR	SERPINE1
Lucid ganoderma	Ganoderic acid TR	ITGA4
Lucid ganoderma	Ganoderic acid TR	AVPR2
Lucid ganoderma	ganoderic acid V	NOS2
Lucid ganoderma	ganoderic acid V	PTPN1
Lucid ganoderma	ganoderic acid V	TNF
Lucid ganoderma	ganoderic acid V	F2
Lucid ganoderma	ganoderic acid V	SERPINA6
Lucid ganoderma	ganoderic acid V	CTSD
Lucid ganoderma	ganoderic acid V	PTGS2
Lucid ganoderma	ganoderic acid V	ITGA4
Lucid ganoderma	ganoderic acid V	CASP3
Lucid ganoderma	ganoderic acid V	AVPR2
Lucid ganoderma	ganoderic acid V	CYP2C19
Lucid ganoderma	ganoderic acid V	ADRB3
Lucid ganoderma	ganoderic acid V	MAPK14
Lucid ganoderma	Ganoderic acid X	VDR
Lucid ganoderma	Ganoderic acid X	NOS2
Lucid ganoderma	Ganoderic acid X	ACE
Lucid ganoderma	Ganoderic acid X	MMP3
Lucid ganoderma	Ganoderic acid X	PTGS2
Lucid ganoderma	Ganoderic acid X	AGTR1
Lucid ganoderma	Ganoderic acid X	CTSD
Lucid ganoderma	Ganoderic acid V1	TNF
Lucid ganoderma	Ganoderic acid V1	NOS2
Lucid ganoderma	Ganoderic acid V1	SERPINA6
Lucid ganoderma	Ganoderic acid V1	AKR1B10
Lucid ganoderma	Ganoderic acid V1	PTPN1
Lucid ganoderma	Ganoderic acid V1	MME
Lucid ganoderma	Ganoderic acid V1	MMP3
Lucid ganoderma	Ganoderic acid V1	MMP2
Lucid ganoderma	Ganoderic acid V1	PTGS2
Lucid ganoderma	Ganoderic acid V1	AGTR1
Lucid ganoderma	Ganoderic acid V1	MAPK3
Lucid ganoderma	Ganoderic acid V1	MMP9
Lucid ganoderma	Ganoderic acid V1	MMP10
Lucid ganoderma	Ganoderic acid V1	CASP3
Lucid ganoderma	Ganoderic acid V1	REN
Lucid ganoderma	Ganoderic acid Y	NOS2
Lucid ganoderma	Ganoderic acid Y	PTPN1
Lucid ganoderma	Ganoderic acid Y	AKR1B10
Lucid ganoderma	Ganoderic acid Y	TNF
Lucid ganoderma	Ganoderic acid Y	SERPINA6
Lucid ganoderma	Ganoderic acid Y	ACE
Lucid ganoderma	Ganoderic acid Y	MAPK3
Lucid ganoderma	Ganoderic acid Y	VDR
Lucid ganoderma	Ganoderic acid Y	PPARG
Lucid ganoderma	ganoderic acid Z	TNF
Lucid ganoderma	ganoderic acid Z	NOS2
Lucid ganoderma	ganoderic acid Z	AKR1B10
Lucid ganoderma	ganoderic acid Z	SERPINA6
Lucid ganoderma	ganoderic acid Z	MME
Lucid ganoderma	ganoderic acid Z	MMP3
Lucid ganoderma	ganoderic acid Z	MMP2
Lucid ganoderma	ganoderic acid Z	PTPN1
Lucid ganoderma	ganoderic acid Z	MAPK3
Lucid ganoderma	ganoderic acid Z	ITGA4
Lucid ganoderma	ganoderic acid Z	HCAR2
Lucid ganoderma	ganoderic acid Z	AGTR1
Lucid ganoderma	ganoderic acid Z	MMP14
Lucid ganoderma	ganoderic acid Z	REN
Lucid ganoderma	ganoderic acid Z	MAPK14
Lucid ganoderma	ganoderic acid Z	MMP9
Lucid ganoderma	ganoderic acid Z	MMP10
Lucid ganoderma	ganoderic acid Z	AKR1B1
Lucid ganoderma	ganoderic acid Z	CASP3
Lucid ganoderma	Ganoderic aldehyde A	SERPINA6
Lucid ganoderma	Ganoderic aldehyde A	NOS2
Lucid ganoderma	Ganoderic aldehyde A	PTPN1
Lucid ganoderma	Ganoderic aldehyde A	MAPK3
Lucid ganoderma	Ganoderic aldehyde A	AKR1B10
Lucid ganoderma	Ganoderic aldehyde A	PTPN6
Lucid ganoderma	Ganoderic aldehyde A	CYP2C19
Lucid ganoderma	Ganoderic aldehyde A	FAAH
Lucid ganoderma	Ganoderic aldehyde A	IL6
Lucid ganoderma	Ganoderic aldehyde A	GLUL
Lucid ganoderma	Ganoderic aldehyde A	PTGS2
Lucid ganoderma	Ganoderic aldehyde A	CNR1
Lucid ganoderma	Ganoderic aldehyde A	TNF
Lucid ganoderma	Ganoderic aldehyde A	PPARG
Lucid ganoderma	Ganoderic aldehyde A	INSR
Lucid ganoderma	Ganoderic aldehyde A	KDR
Lucid ganoderma	Ganoderic aldehyde A	PPARA
Lucid ganoderma	Ganoderiol F	TNF
Lucid ganoderma	Ganoderiol F	PTPN1
Lucid ganoderma	Ganoderiol F	NOS2
Lucid ganoderma	Ganoderiol F	C5AR1
Lucid ganoderma	Ganoderiol F	KDR
Lucid ganoderma	Ganoderiol F	VDR
Lucid ganoderma	Ganoderiol F	EPHX2
Lucid ganoderma	Ganoderiol F	FLT1
Lucid ganoderma	Ganoderiol F	FLT4
Lucid ganoderma	Ganoderiol F	AGTR1
Lucid ganoderma	Ganodermanondiol	PTPN1
Lucid ganoderma	Ganodermanondiol	TNF
Lucid ganoderma	Ganodermanondiol	PPARG
Lucid ganoderma	Ganodermanondiol	VDR
Lucid ganoderma	Ganodermanondiol	KDR
Lucid ganoderma	Ganodermanondiol	SERPINA6
Lucid ganoderma	Ganodermanondiol	CNR1
Lucid ganoderma	Ganodermanondiol	AKR1B10
Lucid ganoderma	Ganodermanondiol	AGTR1
Lucid ganoderma	Ganodermanondiol	FAAH
Lucid ganoderma	Ganodermanondiol	C5AR1
Lucid ganoderma	Ganodermanondiol	REN
Lucid ganoderma	Ganodermanondiol	MAPK3
Lucid ganoderma	Ganodermanondiol	PTGS2
Lucid ganoderma	ganodermatriol	VDR
Lucid ganoderma	ganodermatriol	PTPN1
Lucid ganoderma	ganodermatriol	TNF
Lucid ganoderma	ganodermatriol	RBP4
Lucid ganoderma	ganodermatriol	REN
Lucid ganoderma	ganodermenonol	TNF
Lucid ganoderma	ganodermenonol	PTPN1
Lucid ganoderma	ganodermenonol	NOS2
Lucid ganoderma	ganodermenonol	PRKCD
Lucid ganoderma	ganodermenonol	AGTR1
Lucid ganoderma	ganodermic acid T- Q	NOS2
Lucid ganoderma	ganodermic acid T- Q	VDR
Lucid ganoderma	ganodermic acid T- Q	MMP3
Lucid ganoderma	ganodermic acid T- Q	PTPN1
Lucid ganoderma	ganodermic acid T- Q	PPARG
Lucid ganoderma	ganodermic acid T- Q	TNF
Lucid ganoderma	ganodermic acid T- Q	PTGS2
Lucid ganoderma	ganodermic acid T- Q	F2
Lucid ganoderma	ganodermic acid T- Q	AGTR1
Lucid ganoderma	ganodermic acid T- Q	MAPK14
Lucid ganoderma	ganodermic acid T- Q	AVPR2
Lucid ganoderma	ganodermic acid T- Q	ITGA4
Lucid ganoderma	Ganoderol A	TNF
Lucid ganoderma	Ganoderol A	PTPN1
Lucid ganoderma	Ganoderol A	NOS2
Lucid ganoderma	Ganoderol A	PRKCD
Lucid ganoderma	Ganoderol A	AGTR1
Lucid ganoderma	ganolucidic acid E	NOS2
Lucid ganoderma	ganolucidic acid E	TNF
Lucid ganoderma	ganolucidic acid E	SERPINA6
Lucid ganoderma	ganolucidic acid E	PTPN1
Lucid ganoderma	ganolucidic acid E	PPARG
Lucid ganoderma	ganolucidic acid E	PPARA
Lucid ganoderma	ganolucidic acid E	MAPK3
Lucid ganoderma	ganolucidic acid E	AKR1B10
Lucid ganoderma	ganolucidic acid E	PTPN6
Lucid ganoderma	ganolucidic acid E	EP300
Lucid ganoderma	ganolucidic acid E	AGTR1
Lucid ganoderma	ganolucidic acid E	AVPR2
Lucid ganoderma	ganolucidic acid E	ITGA4
Lucid ganoderma	ganosporelactone B	TNF
Lucid ganoderma	ganosporelactone B	F2
Lucid ganoderma	ganosporelactone B	REN
Lucid ganoderma	ganosporelactone B	PTGS2
Lucid ganoderma	ganosporelactone B	KDR
Lucid ganoderma	ganosporelactone B	MMP2
Lucid ganoderma	ganosporelactone B	PTPN1
Lucid ganoderma	ganosporelactone B	MAPK14
Lucid ganoderma	ganosporelactone B	INSR
Lucid ganoderma	ganosporelactone B	MMP3
Lucid ganoderma	ganosporelactone B	EPHX2
Lucid ganoderma	ganosporelactone B	PRKCD
Lucid ganoderma	Lucialdehyde A	MAPK3
Lucid ganoderma	Lucialdehyde A	AKR1B10
Lucid ganoderma	Lucialdehyde A	PTPN1
Lucid ganoderma	Lucialdehyde A	PRKCD
Lucid ganoderma	Lucialdehyde A	SERPINA6
Lucid ganoderma	Lucialdehyde A	TNF
Lucid ganoderma	Lucialdehyde B	SERPINA6
Lucid ganoderma	Lucialdehyde B	NOS2
Lucid ganoderma	Lucialdehyde B	MAPK3
Lucid ganoderma	Lucialdehyde B	CTSD
Lucid ganoderma	Lucialdehyde B	FAAH
Lucid ganoderma	Lucialdehyde B	PTPN1
Lucid ganoderma	Lucialdehyde B	EPHX2
Lucid ganoderma	Lucialdehyde B	PRKCD
Lucid ganoderma	Lucialdehyde B	AKR1B10
Lucid ganoderma	Lucialdehyde B	FLT1
Lucid ganoderma	Lucialdehyde B	FLT4
Lucid ganoderma	Lucialdehyde B	KDR
Lucid ganoderma	Lucialdehyde B	MMP3
Lucid ganoderma	Lucialdehyde B	MMP9
Lucid ganoderma	Lucialdehyde C	SERPINA6
Lucid ganoderma	Lucialdehyde C	NOS2
Lucid ganoderma	Lucialdehyde C	AKR1B10
Lucid ganoderma	Lucialdehyde C	PTPN1
Lucid ganoderma	Lucialdehyde C	MAPK3
Lucid ganoderma	Lucialdehyde C	PTPN6
Lucid ganoderma	Lucialdehyde C	FAAH
Lucid ganoderma	Lucialdehyde C	GLUL
Lucid ganoderma	Lucialdehyde C	TNF
Lucid ganoderma	Lucialdehyde C	CNR1
Lucid ganoderma	Lucialdehyde C	PTGS2
Lucid ganoderma	Lucialdehyde C	CYP2C19
Lucid ganoderma	Lucialdehyde C	PPARG
Lucid ganoderma	Lucialdehyde C	INSR
Lucid ganoderma	Lucialdehyde C	REN
Lucid ganoderma	lucidone A	TNF
Lucid ganoderma	Lucidumol A	MAPK3
Lucid ganoderma	Lucidumol A	NOS2
Lucid ganoderma	Lucidumol A	AKR1B10
Lucid ganoderma	Lucidumol A	SERPINA6
Lucid ganoderma	Lucidumol A	PTPN1
Lucid ganoderma	Lucidumol A	TNF
Lucid ganoderma	Lucidumol A	PTGS2
Lucid ganoderma	Lucidumol A	PPARG
Lucid ganoderma	Lucidumol A	CNR1
Lucid ganoderma	Lucidumol A	FAAH
Lucid ganoderma	Lucidumol A	PTPN6
Lucid ganoderma	Lucidumol A	AGTR1
Lucid ganoderma	Lucidumol A	REN
Lucid ganoderma	Lucidumol A	KDR
Lucid ganoderma	Lucidumol A	FLT1
Lucid ganoderma	Lucidumol A	FLT4
Lucid ganoderma	Lucidumol A	CYP2C19
Lucid ganoderma	Methyl lucidenate Q	NOS2
Lucid ganoderma	Methyl lucidenate Q	TNF
Lucid ganoderma	Methyl lucidenate Q	PTPN1
Lucid ganoderma	Methyl lucidenate Q	PTGS2
Lucid ganoderma	Methyl lucidenate Q	PPARG
Lucid ganoderma	Methyl lucidenate Q	REN
Lucid ganoderma	Methyl lucidenate Q	MAPK14
Lucid ganoderma	Methyl lucidenate Q	PER2
Lucid ganoderma	Methyl lucidenate Q	MAPK3
Lucid ganoderma	Methyl lucidenate Q	MMP3
Lucid ganoderma	Methyl lucidenate Q	MMP2
Lucid ganoderma	Cerevisterol	VDR
Lucid ganoderma	Cerevisterol	CYP2C19
Lucid ganoderma	Cerevisterol	PTPN1
Lucid ganoderma	Cerevisterol	MAPK14
Lucid ganoderma	Cerevisterol	C5AR1
Lucid ganoderma	Cerevisterol	KDR
Lucid ganoderma	Cerevisterol	PRKCD
Lucid ganoderma	Cerevisterol	F2
Lucid ganoderma	sitosterol	CYP2C19
Lucid ganoderma	sitosterol	PTPN1
Lucid ganoderma	sitosterol	SERPINA6
Lucid ganoderma	sitosterol	VDR
Lucid ganoderma	sitosterol	PPARA
Lucid ganoderma	sitosterol	PTPN6
Lucid ganoderma	sitosterol	NOS2
Lucid ganoderma	sitosterol	PPARG
Lucid ganoderma	Ergosterol	ALB
Lucid ganoderma	Ergosterol	CYP2C19
Lucid ganoderma	Ergosterol	SERPINA6
Lucid ganoderma	Ergosterol	VDR
Lucid ganoderma	Ergosterol	PPARA
Lucid ganoderma	Adenosine,Adenine Nucleoside	GAPDH
Lucid ganoderma	Adenosine,Adenine Nucleoside	ABCC8
Lucid ganoderma	Adenosine,Adenine Nucleoside	IGF1R
Lucid ganoderma	Adenosine,Adenine Nucleoside	MAPK3
Lucid ganoderma	5,6-Dihydroergosterol	VDR
Lucid ganoderma	5,6-Dihydroergosterol	ALB
Lucid ganoderma	5,6-Dihydroergosterol	CYP2C19
Lucid ganoderma	5,6-Dihydroergosterol	SERPINA6
Lucid ganoderma	5,6-Dihydroergosterol	PPARA
Lucid ganoderma	8Β,9Α-Dihydroganoderic Acid J	COX2
Lucid ganoderma	8Β,9Α-Dihydroganoderic Acid J Methyl Ester	COX2
Lucid ganoderma	26,27-Dihydroxy-Lanosta-7,9(11),24-Trien-3,16-Dione	SERPINA6
Lucid ganoderma	26,27-Dihydroxy-Lanosta-7,9(11),24-Trien-3,16-Dione	PTGS2
Lucid ganoderma	26,27-Dihydroxy-Lanosta-7,9(11),24-Trien-3,16-Dione	CYP2C19
Lucid ganoderma	26,27-Dihydroxy-Lanosta-7,9(11),24-Trien-3,16-Dione	VDR
Lucid ganoderma	26,27-Dihydroxy-Lanosta-7,9(11),24-Trien-3,16-Dione	ALB
Lucid ganoderma	Ganode-8-En-Ric Acid A	ALB
Lucid ganoderma	Ganode-8-En-Ric Acid A	VDR
Lucid ganoderma	Ganode-8-En-Ric Acid A	CYP2C19
Lucid ganoderma	Ganode-8-En-Ric Acid A	SERPINA6
Lucid ganoderma	Ganode-8-En-Ric Acid A	COX2
Lucid ganoderma	Ganode-8-En-Ric Acid B	ALB
Lucid ganoderma	Ganode-8-En-Ric Acid B	VDR
Lucid ganoderma	Ganode-8-En-Ric Acid B	CYP2C19
Lucid ganoderma	Ganode-8-En-Ric Acid B	SERPINA6
Lucid ganoderma	Ganode-8-En-Ric Acid B	COX2
Lucid ganoderma	Ganode-8-En-Ric Acid C1	PPARA
Lucid ganoderma	Ganode-8-En-Ric Acid C1	SERPINA6
Lucid ganoderma	Ganode-8-En-Ric Acid C1	ALB
Lucid ganoderma	Ganode-8-En-Ric Acid C1	VDR
Lucid ganoderma	Ganode-8-En-Ric Acid C1	COX2
Lucid ganoderma	Ganoderic Acid Am1	ALB
Lucid ganoderma	Ganoderic Acid Am1	VDR
Lucid ganoderma	Ganoderic Acid Am1	CYP2C19
Lucid ganoderma	Ganoderic Acid Am1	SERPINA6
Lucid ganoderma	Ganoderic Acid Am1	COX2
Lucid ganoderma	Ganoderic Acid B8	ALB
Lucid ganoderma	Ganoderic Acid B8	VDR
Lucid ganoderma	Ganoderic Acid B8	CYP2C19
Lucid ganoderma	Ganoderic Acid B8	SERPINA6
Lucid ganoderma	Ganoderic Acid B8	COX2
Lucid ganoderma	Ganoderic Acid C1	PPARA
Lucid ganoderma	Ganoderic Acid C1	SERPINA6
Lucid ganoderma	Ganoderic Acid C1	ALB
Lucid ganoderma	Ganoderic Acid C1	VDR
Lucid ganoderma	Ganoderic Acid C1	COX2
Lucid ganoderma	Ganoderic Acid E	ALB
Lucid ganoderma	Ganoderic Acid E	VDR
Lucid ganoderma	Ganoderic Acid E	SERPINA6
Lucid ganoderma	Ganoderic Acid E	PPARA
Lucid ganoderma	Ganoderiol B	VDR
Lucid ganoderma	Ganoderiol B	SERPINA6
Lucid ganoderma	Ganoderiol B	PTGS2
Lucid ganoderma	Ganoderiol B	CYP2C19
Lucid ganoderma	Ganoderiol B	ALB
Lucid ganoderma	Ganoderiol D	VDR
Lucid ganoderma	Ganoderiol D	SERPINA6
Lucid ganoderma	Ganoderiol D	CYP2C19
Lucid ganoderma	Ganoderiol D	PTGS2
Lucid ganoderma	Ganoderiol D	ALB
Lucid ganoderma	Ganoderiol F	CYP2C19
Lucid ganoderma	Ganoderiol F	VDR
Lucid ganoderma	Ganoderiol F	ALB
Lucid ganoderma	Ganoderiol F	SERPINA6
Lucid ganoderma	Ganodermanondiol	PPARA
Lucid ganoderma	Ganodermanondiol	SERPINA6
Lucid ganoderma	Ganodermanondiol	VDR
Lucid ganoderma	Ganodermanondiol	ALB
Lucid ganoderma	Ganodermanondiol	CYP2C19
Lucid ganoderma	Ganodermanontriol	VDR
Lucid ganoderma	Ganodermanontriol	SERPINA6
Lucid ganoderma	Ganodermanontriol	CYP2C19
Lucid ganoderma	Ganodermanontriol	PTGS2
Lucid ganoderma	Ganodermanontriol	ALB
Lucid ganoderma	Ganolactone	CYP2C19
Lucid ganoderma	Ganolactone	SERPINA6
Lucid ganoderma	Ganolucidic Acid A	ALB
Lucid ganoderma	Ganolucidic Acid A	VDR
Lucid ganoderma	Ganolucidic Acid A	CYP2C19
Lucid ganoderma	Ganolucidic Acid A	SERPINA6
Lucid ganoderma	Ganolucidic Acid A	COX2
Lucid ganoderma	Ganolucidic Acid B	ALB
Lucid ganoderma	Ganolucidic Acid B	VDR
Lucid ganoderma	Ganolucidic Acid B	CYP2C19
Lucid ganoderma	Ganolucidic Acid B	SERPINA6
Lucid ganoderma	Ganolucidic Acid B	COX2
Lucid ganoderma	Ganosporeric Acid A	VDR
Lucid ganoderma	Ganosporeric Acid A	SERPINA6
Lucid ganoderma	Ganosporeric Acid A	ALB
Lucid ganoderma	Lucidenic Acid A	PPARA
Lucid ganoderma	Lucidenic Acid A	SERPINA6
Lucid ganoderma	Lucidenic Acid A	ALB
Lucid ganoderma	Lucidenic Acid A	VDR
Lucid ganoderma	Lucidenic Acid A	COX2
Lucid ganoderma	Lucidenic Acid B	SERPINA6
Lucid ganoderma	Lucidenic Acid B	VDR
Lucid ganoderma	Lucidenic Acid B	ALB
Lucid ganoderma	Lucidenic Acid B	CYP2C19
Lucid ganoderma	Lucidenic Acid B	COX2
Lucid ganoderma	Lucidenic Acid D1	PPARA
Lucid ganoderma	Lucidenic Acid D1	SERPINA6
Lucid ganoderma	Lucidenic Acid D1	ALB
Lucid ganoderma	Lucidenic Acid D1	VDR
Lucid ganoderma	Lucidenic Acid D2	SERPINA6
Lucid ganoderma	Lucidenic Acid D2	VDR
Lucid ganoderma	Lucidenic Acid D2	CYP2C19
Lucid ganoderma	Lucidenic Acid D2	ALB
Lucid ganoderma	Lucidenic Acid E1	SERPINA6
Lucid ganoderma	Lucidenic Acid E1	VDR
Lucid ganoderma	Lucidenic Acid E1	ALB
Lucid ganoderma	Lucidenic Acid E1	CYP2C19
Lucid ganoderma	Lucidenic Acid E1	COX2
Lucid ganoderma	Lucidenic Acid E2	SERPINA6
Lucid ganoderma	Lucidenic Acid E2	ALB
Lucid ganoderma	Lucidenic Acid E2	CYP2C19
Lucid ganoderma	Lucidenic Acid E2	COX2
Lucid ganoderma	Lucidenic Acid E2	VDR
Lucid ganoderma	Lucidenic Acid F	ALB
Lucid ganoderma	Lucidenic Acid F	VDR
Lucid ganoderma	Lucidenic Acid F	CYP2C19
Lucid ganoderma	Lucidenic Acid F	COX2
Lucid ganoderma	Lucidenic Acid F	PPARA
Lucid ganoderma	Lucidenic Acid F	SERPINA6
Lucid ganoderma	Lucidenic Acid I	VDR
Lucid ganoderma	Lucidenic Acid I	SERPINA6
Lucid ganoderma	Lucidenic Acid I	PTGS2
Lucid ganoderma	Lucidenic Acid I	CYP2C19
Lucid ganoderma	Lucidenic Acid I	ALB
Lucid ganoderma	Lucidenic Acid K	SERPINA6
Lucid ganoderma	Lucidenic Acid K	VDR
Lucid ganoderma	Lucidenic Acid K	ALB
Lucid ganoderma	Lucidenic Acid K	CYP2C19
Lucid ganoderma	Lucidenic Acid K	COX2
Lucid ganoderma	Lucidenic Acid L	SERPINA6
Lucid ganoderma	Lucidenic Acid L	VDR
Lucid ganoderma	Lucidenic Acid L	ALB
Lucid ganoderma	Lucidenic Acid L	CYP2C19
Lucid ganoderma	Lucidenic Acid L	COX2
Lucid ganoderma	Lucidenic Acid Lm1	ALB
Lucid ganoderma	Lucidenic Acid Lm1	VDR
Lucid ganoderma	Lucidenic Acid Lm1	CYP2C19
Lucid ganoderma	Lucidenic Acid Lm1	SERPINA6
Lucid ganoderma	Lucidenic Acid Lm1	COX2
Lucid ganoderma	Lucidenic Acid Lw1	ALB
Lucid ganoderma	Lucidenic Acid Lw1	VDR
Lucid ganoderma	Lucidenic Acid Lw1	CYP2C19
Lucid ganoderma	Lucidenic Acid Lw1	SERPINA6
Lucid ganoderma	Lucidenic Acid Lw1	COX2
Lucid ganoderma	Lucidenic Acid M	ALB
Lucid ganoderma	Lucidenic Acid M	VDR
Lucid ganoderma	Lucidenic Acid M	CYP2C19
Lucid ganoderma	Lucidenic Acid M	SERPINA6
Lucid ganoderma	Lucidenic Acid M	COX2
Lucid ganoderma	Lucidone A	ALB
Lucid ganoderma	Lucidone A	VDR
Lucid ganoderma	Lucidone A	CYP2C19
Lucid ganoderma	Lucidone A	SERPINA6
Lucid ganoderma	Lucidone A	COX2
Lucid ganoderma	Lucidone A	PPARA
Lucid ganoderma	Lucidone B	ALB
Lucid ganoderma	Lucidone B	VDR
Lucid ganoderma	Lucidone B	CYP2C19
Lucid ganoderma	Lucidone B	PPARA
Lucid ganoderma	Lucidone B	SERPINA6
Lucid ganoderma	Lucidone C	ALB
Lucid ganoderma	Lucidone C	VDR
Lucid ganoderma	Lucidone C	CYP2C19
Lucid ganoderma	Lucidone C	SERPINA6
Lucid ganoderma	Lucidone C	COX2
Lucid ganoderma	Lucidone C	PPARA
Lucid ganoderma	Lucidumol A	VDR
Lucid ganoderma	Lucidumol A	ALB
Lucid ganoderma	Lucidumol A	SERPINA6
Lucid ganoderma	Lucidumol A	CYP2C19
Lucid ganoderma	24-Methylcholesta-7,22-Dien-3Β-Ol	VDR
Lucid ganoderma	24-Methylcholesta-7,22-Dien-3Β-Ol	ALB
Lucid ganoderma	24-Methylcholesta-7,22-Dien-3Β-Ol	CYP2C19
Lucid ganoderma	24-Methylcholesta-7,22-Dien-3Β-Ol	SERPINA6
Lucid ganoderma	24-Methylcholesta-7,22-Dien-3Β-Ol	PPARA
Lucid ganoderma	Methyl Lucidenate A	CYP2C19
Lucid ganoderma	Methyl Lucidenate A	SERPINA6
Lucid ganoderma	Methyl Lucidenate A	ALB
Lucid ganoderma	Methyl Lucidenate E2	SERPINA6
Lucid ganoderma	Methyl Lucidenate E2	CYP2C19
Lucid ganoderma	Methyl Lucidenate E2	ALB
Lucid ganoderma	Methyl Lucidenate F	ALB
Lucid ganoderma	Methyl Lucidenate L	SERPINA6
Lucid ganoderma	Methyl Lucidenate L	COX2
Lucid ganoderma	Methyl Lucidenate L	ALB
Lucid ganoderma	Methyl Lucidenate L	CYP2C19
Lucid ganoderma	Methyl Lucidenate Q	ALB
Lucid ganoderma	Methyl Lucidenate Q	CYP2C19
Lucid ganoderma	Methyl Lucidenate Q	SERPINA6
Lucid ganoderma	Ganoderenic Acid D	PPARA
Lucid ganoderma	Ganoderenic Acid D	SERPINA6
Lucid ganoderma	Ganoderenic Acid D	ALB
Lucid ganoderma	Ganoderenic Acid D	VDR
Lucid ganoderma	Ganoderenic Acid D	COX2
Lucid ganoderma	beta-sitosterol	CYP2C19
Lucid ganoderma	beta-sitosterol	PTPN1
Lucid ganoderma	beta-sitosterol	SERPINA6
Lucid ganoderma	beta-sitosterol	VDR
Lucid ganoderma	beta-sitosterol	PPARA
Lucid ganoderma	beta-sitosterol	PTPN6
Lucid ganoderma	beta-sitosterol	NOS2
Lucid ganoderma	beta-sitosterol	PPARG
Lucid ganoderma	arachidonate	PPARG
Lucid ganoderma	arachidonate	PPARA
Lucid ganoderma	arachidonate	CNR1
Lucid ganoderma	arachidonate	FAAH
Lucid ganoderma	arachidonate	PTPN1
Lucid ganoderma	arachidonate	ALOX15
Lucid ganoderma	arachidonate	AKR1B10
Lucid ganoderma	arachidonate	NOS2
Lucid ganoderma	arachidonate	PTPN6
Lucid ganoderma	arachidonate	MMP3
Lucid ganoderma	arachidonate	RBP4
Lucid ganoderma	arachidonate	ACE
Lucid ganoderma	arachidonate	KEAP1
Lucid ganoderma	arachidonate	MMP9
Lucid ganoderma	arachidonate	MMP2
Lucid ganoderma	arachidonate	AGTR1
Lucid ganoderma	suchilactone	NOS1
Lucid ganoderma	suchilactone	NOS3
Lucid ganoderma	suchilactone	FLT1
Lucid ganoderma	suchilactone	FLT4
Lucid ganoderma	suchilactone	IGF1R
Lucid ganoderma	suchilactone	RAF1
Lucid ganoderma	suchilactone	FAAH
Lucid ganoderma	suchilactone	GCK
Lucid ganoderma	suchilactone	TGFB1
Lucid ganoderma	Yangambin	HIF1A
Lucid ganoderma	Yangambin	ALOX15
Lucid ganoderma	quercetin	AVPR2
Lucid ganoderma	quercetin	AKR1B1
Lucid ganoderma	quercetin	IGF1R
Lucid ganoderma	quercetin	F2
Lucid ganoderma	quercetin	GLO1
Lucid ganoderma	quercetin	CA1
Lucid ganoderma	quercetin	KDR
Lucid ganoderma	quercetin	MMP3
Lucid ganoderma	quercetin	ALOX15
Lucid ganoderma	quercetin	MMP9
Lucid ganoderma	quercetin	MMP2
Lucid ganoderma	quercetin	AKR1A1
Lucid ganoderma	quercetin	INSR
Lucid ganoderma	quercetin	AKR1B10
Lucid ganoderma	succinic Acid	HBB
Lucid ganoderma	succinic Acid	SDHB
Lycium barbarum	Sitosterol alpha1	PTPN1
Lycium barbarum	Sitosterol alpha1	CYP2C19
Lycium barbarum	Sitosterol alpha1	SERPINA6
Lycium barbarum	Sitosterol alpha1	PTPN6
Lycium barbarum	Sitosterol alpha1	VDR
Lycium barbarum	Sitosterol alpha1	PPARG
Lycium barbarum	Sitosterol alpha1	PPARA
Lycium barbarum	Sitosterol alpha1	NOS2
Lycium barbarum	Sitosterol alpha1	MAPK3
Lycium barbarum	Sitosterol alpha1	AKR1B10
Lycium barbarum	Sitosterol alpha1	CNR1
Lycium barbarum	Cycloartenol	CYP2C19
Lycium barbarum	Cycloartenol	PTPN1
Lycium barbarum	Cycloartenol	VDR
Lycium barbarum	Cycloartenol	PTGS2
Lycium barbarum	Mandenol	FAAH
Lycium barbarum	Mandenol	CNR1
Lycium barbarum	Mandenol	PPARG
Lycium barbarum	Mandenol	PTGS2
Lycium barbarum	Mandenol	PTPN1
Lycium barbarum	Mandenol	C5AR1
Lycium barbarum	Mandenol	FLT1
Lycium barbarum	Mandenol	KDR
Lycium barbarum	Mandenol	PPARA
Lycium barbarum	Mandenol	PRKCD
Lycium barbarum	Mandenol	GCK
Lycium barbarum	Mandenol	RBP4
Lycium barbarum	Mandenol	CYP2C19
Lycium barbarum	Ethyl linolenate	FAAH
Lycium barbarum	Ethyl linolenate	CNR1
Lycium barbarum	Ethyl linolenate	PTGS2
Lycium barbarum	Ethyl linolenate	PPARG
Lycium barbarum	Ethyl linolenate	PPARA
Lycium barbarum	Ethyl linolenate	PTPN1
Lycium barbarum	Ethyl linolenate	AVPR2
Lycium barbarum	Ethyl linolenate	PRKCD
Lycium barbarum	LAN	PTPN1
Lycium barbarum	LAN	CYP2C19
Lycium barbarum	LAN	PTPN6
Lycium barbarum	LAN	PPARG
Lycium barbarum	LAN	PPARA
Lycium barbarum	LAN	MAPK3
Lycium barbarum	LAN	AKR1B10
Lycium barbarum	LAN	SERPINA6
Lycium barbarum	LAN	CNR1
Lycium barbarum	LAN	VDR
Lycium barbarum	Stigmasterone	CTSD
Lycium barbarum	Stigmasterone	SERPINA6
Lycium barbarum	Stigmasterone	FAAH
Lycium barbarum	Stigmasterone	PTPN1
Lycium barbarum	Stigmasterone	PTPN6
Lycium barbarum	sitosterol	CYP2C19
Lycium barbarum	sitosterol	PTPN1
Lycium barbarum	sitosterol	SERPINA6
Lycium barbarum	sitosterol	VDR
Lycium barbarum	sitosterol	PPARA
Lycium barbarum	sitosterol	PTPN6
Lycium barbarum	sitosterol	NOS2
Lycium barbarum	sitosterol	PPARG
Lycium barbarum	campesterol	CYP2C19
Lycium barbarum	campesterol	PTPN1
Lycium barbarum	campesterol	SERPINA6
Lycium barbarum	cyanin	AKR1B1
Lycium barbarum	cyanin	PTGS2
Lycium barbarum	cyanin	TNF
Lycium barbarum	24-methylidenelophenol	PTPN1
Lycium barbarum	24-methylidenelophenol	CYP2C19
Lycium barbarum	24-methylidenelophenol	PTPN6
Lycium barbarum	24-methylidenelophenol	NOS2
Lycium barbarum	24-methylidenelophenol	VDR
Lycium barbarum	24-methylidenelophenol	CNR1
Lycium barbarum	24-methylidenelophenol	MAPK3
Lycium barbarum	24-methylidenelophenol	AKR1B10
Lycium barbarum	24-methylidenelophenol	SERPINA6
Lycium barbarum	24-ethylcholest-22-enol	PTPN1
Lycium barbarum	24-ethylcholest-22-enol	CYP2C19
Lycium barbarum	24-ethylcholest-22-enol	AKR1B10
Lycium barbarum	24-ethylcholest-22-enol	PTPN6
Lycium barbarum	24-ethylcholest-22-enol	PPARA
Lycium barbarum	24-ethylcholest-22-enol	PTPN1
Lycium barbarum	24-ethylcholest-22-enol	CYP2C19
Lycium barbarum	24-ethylcholest-22-enol	AKR1B10
Lycium barbarum	24-ethylcholest-22-enol	PTPN6
Lycium barbarum	24-ethylcholest-22-enol	PPARA
Lycium barbarum	24-ethylcholesta-5,22-dienol	PTPN1
Lycium barbarum	24-ethylcholesta-5,22-dienol	CYP2C19
Lycium barbarum	24-ethylcholesta-5,22-dienol	AKR1B10
Lycium barbarum	24-ethylcholesta-5,22-dienol	PTPN6
Lycium barbarum	24-ethylcholesta-5,22-dienol	SERPINA6
Lycium barbarum	Fucosterol	SERPINA6
Lycium barbarum	Fucosterol	PTPN1
Lycium barbarum	Fucosterol	CYP2C19
Lycium barbarum	Fucosterol	VDR
Lycium barbarum	Fucosterol	PPARA
Lycium barbarum	Fucosterol	PTPN6
Lycium barbarum	Fucosterol	PPARG
Lycium barbarum	31-norlanosterol	PTPN1
Lycium barbarum	31-norlanosterol	CYP2C19
Lycium barbarum	31-norlanosterol	SERPINA6
Lycium barbarum	31-norlanosterol	PTPN6
Lycium barbarum	31-norlanosterol	PPARG
Lycium barbarum	31-norlanosterol	PPARA
Lycium barbarum	31-norlanosterol	VDR
Lycium barbarum	31-norlanosterol	MAPK3
Lycium barbarum	31-norlanosterol	AKR1B10
Lycium barbarum	31-norlanosterol	NOS2
Lycium barbarum	31-norlanosterol	CNR1
Lycium barbarum	Lophenol	CYP2C19
Lycium barbarum	Lophenol	PTPN1
Lycium barbarum	4alpha,14alpha,24-trimethylcholesta-8,24-dienol	CYP2C19
Lycium barbarum	4alpha,14alpha,24-trimethylcholesta-8,24-dienol	PTPN1
Lycium barbarum	4alpha,14alpha,24-trimethylcholesta-8,24-dienol	NOS2
Lycium barbarum	4alpha,14alpha,24-trimethylcholesta-8,24-dienol	TNF
Lycium barbarum	4alpha,24-dimethylcholesta-7,24-dienol	PTPN1
Lycium barbarum	4alpha,24-dimethylcholesta-7,24-dienol	NOS2
Lycium barbarum	4alpha,24-dimethylcholesta-7,24-dienol	CYP2C19
Lycium barbarum	4alpha-methyl-24-ethylcholesta-7,24-dienol	PTPN1
Lycium barbarum	4alpha-methyl-24-ethylcholesta-7,24-dienol	NOS2
Lycium barbarum	4alpha-methyl-24-ethylcholesta-7,24-dienol	CYP2C19
Lycium barbarum	4alpha-methyl-24-ethylcholesta-7,24-dienol	IGF1R
Lycium barbarum	4alpha-methyl-24-ethylcholesta-7,24-dienol	KDR
Lycium barbarum	4alpha-methyl-24-ethylcholesta-7,24-dienol	VDR
Lycium barbarum	4alpha-methyl-24-ethylcholesta-7,24-dienol	PRKCD
Lycium barbarum	Cycloeucalenol	PTPN1
Lycium barbarum	Cycloeucalenol	CYP2C19
Lycium barbarum	Lantadene A	PTPN1
Lycium barbarum	Physcion 8-gentiobioside	EPHX2
Lycium barbarum	Physcion 8-gentiobioside	MME
Lycium barbarum	Physcion 8-gentiobioside	ACE
Lycium barbarum	Physcion 8-gentiobioside	HRAS
Lycium barbarum	Obtusifoliol	PTPN1
Lycium barbarum	Obtusifoliol	CYP2C19
Lycium barbarum	Obtusifoliol	SERPINA6
Lycium barbarum	Obtusifoliol	PTPN6
Lycium barbarum	Obtusifoliol	VDR
Lycium barbarum	Obtusifoliol	NOS2
Lycium barbarum	Obtusifoliol	PPARG
Lycium barbarum	Obtusifoliol	PPARA
Lycium barbarum	Obtusifoliol	MAPK3
Lycium barbarum	Obtusifoliol	AKR1B10
Lycium barbarum	Obtusifoliol	CNR1
Lycium barbarum	quercetin	AVPR2
Lycium barbarum	quercetin	AKR1B1
Lycium barbarum	quercetin	IGF1R
Lycium barbarum	quercetin	F2
Lycium barbarum	quercetin	GLO1
Lycium barbarum	quercetin	CA1
Lycium barbarum	quercetin	KDR
Lycium barbarum	quercetin	MMP3
Lycium barbarum	quercetin	ALOX15
Lycium barbarum	quercetin	MMP9
Lycium barbarum	quercetin	MMP2
Lycium barbarum	quercetin	AKR1A1
Lycium barbarum	quercetin	INSR
Lycium barbarum	quercetin	AKR1B10
Lycium barbarum	glycitein	ALDH2
Lycium barbarum	glycitein	ALOX15
Lycium barbarum	glycitein	PON1
Lycium barbarum	glycitein	CA1
Lycium barbarum	glycitein	PPARA
Lycium barbarum	glycitein	AKR1B1
Lycium barbarum	Atropine	KDM1A
Lycium barbarum	Atropine	IGF1R
Lycium barbarum	Atropine	MAPK14
Lycium barbarum	Atropine	PTPN1
Lycium barbarum	Atropine	NOS2
Lycium barbarum	Atropine	NOS3
Lycium barbarum	Atropine	PLG
Lycium barbarum	Niacin,Nicotinic Acid	HCAR2
Lycium barbarum	Inosine	ALB
Lycium barbarum	Inosine	MAPK3
Lycium barbarum	Withanolide A	GLUL
Lycium barbarum	Withanolide A	ALB
Lycium barbarum	Withanolide B	GLUL
Lycium barbarum	Β-Ionone	RBP4
Lycium barbarum	Β-Ionone	ALB
Angelica sinensis	Stigmasterol	CYP2C19
Angelica sinensis	Stigmasterol	PTPN1
Angelica sinensis	Stigmasterol	SERPINA6
Angelica sinensis	Stigmasterol	VDR
Angelica sinensis	Stigmasterol	PPARA
Angelica sinensis	Stigmasterol	PTPN6
Angelica sinensis	Stigmasterol	NOS2
Angelica sinensis	Stigmasterol	PPARG
Angelica sinensis	sitosterol	CYP2C19
Angelica sinensis	sitosterol	PTPN1
Angelica sinensis	sitosterol	SERPINA6
Angelica sinensis	sitosterol	VDR
Angelica sinensis	sitosterol	PPARA
Angelica sinensis	sitosterol	PTPN6
Angelica sinensis	sitosterol	NOS2
Angelica sinensis	sitosterol	PPARG
Angelica sinensis	Carvacrol	FAAH
Angelica sinensis	Carvacrol	ALB
Angelica sinensis	Carvacrol	CYP2C19
Angelica sinensis	Anisic Acid	ALB
Angelica sinensis	Anisic Acid	PTGS2
Angelica sinensis	Anisic Acid	PPARG
Angelica sinensis	Anisic Acid	PPARA
Angelica sinensis	Succinic Acid	HBB
Angelica sinensis	Succinic Acid	SDHB
Angelica sinensis	Phenol	INS
Angelica sinensis	Phenol	ALB
Angelica sinensis	Sebacic Acid	SDHB
Angelica sinensis	Sebacic Acid	HBB
Angelica sinensis	Niacin	HCAR2
Angelica sinensis	Retinol	RBP4
Angelica sinensis	Retinol	ALB
Angelica sinensis	Retinol	RBP3
Angelica sinensis	Azelaic Acid	SDHB
Angelica sinensis	Azelaic Acid	HBB
Angelica sinensis	O-Cresol	FAAH
Angelica sinensis	O-Cresol	ALB
Angelica sinensis	O-Cresol	CYP2C19
Angelica sinensis	O-Cresol	INS
Angelica sinensis	P-Cresol	ALB
Angelica sinensis	P-Cresol	INS
Angelica sinensis	2,3-Dicresol	FAAH
Angelica sinensis	2,4-Dicresol	ALB
Angelica sinensis	2,5-Dicresol	CYP2C19
Angelica sinensis	2',4'-Dihydroxyacetophenone	ALB
Angelica sinensis	2',5'-Dihydroxyacetophenone	PTGS2
Angelica sinensis	Dodecanol	FAAH
Angelica sinensis	Maruzen M,P-Ethylphenol	INS
Semen Cuscutae	sesamin	HIF1A
Semen Cuscutae	matrine	FAAH
Semen Cuscutae	matrine	MME
Semen Cuscutae	NSC63551	CTSD
Semen Cuscutae	NSC63551	FAAH
Semen Cuscutae	NSC63551	PTPN1
Semen Cuscutae	NSC63551	PTPN6
Semen Cuscutae	NSC63551	CNR1
Semen Cuscutae	NSC63551	SERPINA6
Semen Cuscutae	NSC63551	PPARG
Semen Cuscutae	NSC63551	PPARA
Semen Cuscutae	NSC63551	MAPK3
Semen Cuscutae	NSC63551	AKR1B10
Semen Cuscutae	isorhamnetin	AKR1B1
Semen Cuscutae	isorhamnetin	IGF1R
Semen Cuscutae	isorhamnetin	ALOX15
Semen Cuscutae	isorhamnetin	AVPR2
Semen Cuscutae	isorhamnetin	F2
Semen Cuscutae	isorhamnetin	GLO1
Semen Cuscutae	isorhamnetin	CA1
Semen Cuscutae	isorhamnetin	KDR
Semen Cuscutae	isorhamnetin	MMP3
Semen Cuscutae	isorhamnetin	MMP9
Semen Cuscutae	isorhamnetin	MMP2
Semen Cuscutae	isorhamnetin	AKR1A1
Semen Cuscutae	isorhamnetin	INSR
Semen Cuscutae	isorhamnetin	PLG
Semen Cuscutae	isorhamnetin	AKR1B10
Semen Cuscutae	beta-sitosterol	CYP2C19
Semen Cuscutae	beta-sitosterol	PTPN1
Semen Cuscutae	beta-sitosterol	SERPINA6
Semen Cuscutae	beta-sitosterol	VDR
Semen Cuscutae	beta-sitosterol	PPARA
Semen Cuscutae	beta-sitosterol	PTPN6
Semen Cuscutae	beta-sitosterol	NOS2
Semen Cuscutae	beta-sitosterol	PPARG
Semen Cuscutae	kaempferol	AKR1B1
Semen Cuscutae	kaempferol	GLO1
Semen Cuscutae	kaempferol	MMP9
Semen Cuscutae	kaempferol	MMP2
Semen Cuscutae	kaempferol	ALOX15
Semen Cuscutae	kaempferol	AKR1B10
Semen Cuscutae	kaempferol	AVPR2
Semen Cuscutae	kaempferol	IGF1R
Semen Cuscutae	kaempferol	F2
Semen Cuscutae	kaempferol	CA1
Semen Cuscutae	kaempferol	KDR
Semen Cuscutae	kaempferol	MMP3
Semen Cuscutae	kaempferol	AKR1A1
Semen Cuscutae	kaempferol	CA1
Semen Cuscutae	kaempferol	ALB
Semen Cuscutae	kaempferol	PTGS2
Semen Cuscutae	campest-5-en-3beta-ol	CYP2C19
Semen Cuscutae	campest-5-en-3beta-ol	PTPN1
Semen Cuscutae	campest-5-en-3beta-ol	SERPINA6
Semen Cuscutae	Isofucosterol	SERPINA6
Semen Cuscutae	Isofucosterol	PTPN1
Semen Cuscutae	Isofucosterol	CYP2C19
Semen Cuscutae	Isofucosterol	VDR
Semen Cuscutae	Isofucosterol	PPARA
Semen Cuscutae	Isofucosterol	PTPN6
Semen Cuscutae	Isofucosterol	PPARG
Semen Cuscutae	quercetin	AVPR2
Semen Cuscutae	quercetin	AKR1B1
Semen Cuscutae	quercetin	IGF1R
Semen Cuscutae	quercetin	F2
Semen Cuscutae	quercetin	GLO1
Semen Cuscutae	quercetin	CA1
Semen Cuscutae	quercetin	KDR
Semen Cuscutae	quercetin	MMP3
Semen Cuscutae	quercetin	ALOX15
Semen Cuscutae	quercetin	MMP9
Semen Cuscutae	quercetin	MMP2
Semen Cuscutae	quercetin	AKR1A1
Semen Cuscutae	quercetin	INSR
Semen Cuscutae	quercetin	AKR1B10
Semen Cuscutae	quercetin	CA1
Semen Cuscutae	quercetin	ALB
Rhizoma atractylodis	wogonin	PTGS2
Rhizoma atractylodis	wogonin	NOS2
Rhizoma atractylodis	wogonin	AKR1B1
Rhizoma atractylodis	wogonin	ALOX15
Rhizoma atractylodis	wogonin	CA1
Rhizoma atractylodis	wogonin	MMP9
Rhizoma atractylodis	wogonin	MMP2
Rhizoma atractylodis	wogonin	INSR
Rhizoma atractylodis	wogonin	MMP3
Rhizoma atractylodis	wogonin	AKR1A1
Rhizoma atractylodis	wogonin	AVPR2
Rhizoma atractylodis	NSC63551	CTSD
Rhizoma atractylodis	NSC63551	FAAH
Rhizoma atractylodis	NSC63551	PTPN1
Rhizoma atractylodis	NSC63551	PTPN6
Rhizoma atractylodis	NSC63551	CNR1
Rhizoma atractylodis	NSC63551	SERPINA6
Rhizoma atractylodis	NSC63551	PPARG
Rhizoma atractylodis	NSC63551	PPARA
Rhizoma atractylodis	NSC63551	MAPK3
Rhizoma atractylodis	NSC63551	AKR1B10
Rhizoma atractylodis	Epicatechin	ALB
Rhizoma atractylodis	Adenosine	GAPDH
Rhizoma atractylodis	Adenosine	ABCC8
Rhizoma atractylodis	Adenosine	IGF1R
Rhizoma atractylodis	Adenosine	MAPK3
Rhizoma atractylodis	3Β-Hydroxyatractylone	ALB
Rhizoma atractylodis	3Β-Hydroxyatractylone	CYP2C19
Rhizoma atractylodis	(5R,7R,10S)-Isopterocarpolon Β-D-Glucopyranoside	VDR
Rhizoma atractylodis	(5R,7R,10S)-Isopterocarpolon Β-D-Glucopyranoside	ALB
Ligusticum wallichii	Mandenol	FAAH
Ligusticum wallichii	Mandenol	CNR1
Ligusticum wallichii	Mandenol	PPARG
Ligusticum wallichii	Mandenol	PTGS2
Ligusticum wallichii	Mandenol	PTPN1
Ligusticum wallichii	Mandenol	C5AR1
Ligusticum wallichii	Mandenol	FLT1
Ligusticum wallichii	Mandenol	KDR
Ligusticum wallichii	Mandenol	PPARA
Ligusticum wallichii	Mandenol	PRKCD
Ligusticum wallichii	Mandenol	GCK
Ligusticum wallichii	Mandenol	RBP4
Ligusticum wallichii	Mandenol	CYP2C19
Ligusticum wallichii	Myricanone	CNR1
Ligusticum wallichii	Myricanone	FLT1
Ligusticum wallichii	Myricanone	FLT4
Ligusticum wallichii	Myricanone	MMP3
Ligusticum wallichii	Myricanone	MMP2
Ligusticum wallichii	Myricanone	RAF1
Ligusticum wallichii	Myricanone	MAPK14
Ligusticum wallichii	Myricanone	MMP9
Ligusticum wallichii	Myricanone	FAAH
Ligusticum wallichii	wallichilide	SLC2A1
Ligusticum wallichii	wallichilide	AVPR2
Ligusticum wallichii	wallichilide	MAPK14
Ligusticum wallichii	wallichilide	CNR1
Ligusticum wallichii	wallichilide	ACE
Ligusticum wallichii	wallichilide	EPHX2
Ligusticum wallichii	wallichilide	FLT1
Ligusticum wallichii	wallichilide	KDR
Ligusticum wallichii	wallichilide	PTPN1
Ligusticum wallichii	wallichilide	KCNJ11
Ligusticum wallichii	wallichilide	BDKRB1
Ligusticum wallichii	wallichilide	MME
Ligusticum wallichii	senkyunone	EPHX2
Ligusticum wallichii	senkyunone	PTGS2
Ligusticum wallichii	senkyunone	AVPR2
Ligusticum wallichii	senkyunone	KDR
Ligusticum wallichii	senkyunone	MAPK14
Ligusticum wallichii	senkyunone	CCR2
Ligusticum wallichii	senkyunone	FLT4
Ligusticum wallichii	senkyunone	IGF1R
Ligusticum wallichii	senkyunone	GCK
Ligusticum wallichii	senkyunone	INSR
Ligusticum wallichii	sitosterol	CYP2C19
Ligusticum wallichii	sitosterol	PTPN1
Ligusticum wallichii	sitosterol	SERPINA6
Ligusticum wallichii	sitosterol	VDR
Ligusticum wallichii	sitosterol	PPARA
Ligusticum wallichii	sitosterol	PTPN6
Ligusticum wallichii	sitosterol	NOS2
Ligusticum wallichii	sitosterol	PPARG
Ligusticum wallichii	Chrysophanic Acid	ALB
Ligusticum wallichii	Chrysophanic Acid	SLC2A1
Ligusticum wallichii	Chrysophanic Acid	ALOX15
Ligusticum wallichii	Chrysophanic Acid	PTGS2
Ligusticum wallichii	Chrysophanic Acid	PPARG
Ligusticum wallichii	Chrysophanic Acid	PPARA
Ligusticum wallichii	Spathulenol	VDR
Ligusticum wallichii	Spathulenol	CYP2C19
Ligusticum wallichii	Chrysophanol	ALB
Ligusticum wallichii	(Z')-3,8-Dihydro-6,6',7,3'Α-Diligustilide	PTGS2
Ligusticum wallichii	Retinol	RBP4
Ligusticum wallichii	Retinol	ALB
Ligusticum wallichii	Retinol	RBP3
Ligusticum wallichii	Spathulenol	VDR
Ligusticum wallichii	Spathulenol	CYP2C19
Ligusticum wallichii	Wallichilide	ALB
Salvia miltiorrhiza	Poriferasterol	CYP2C19
Salvia miltiorrhiza	Poriferasterol	PTPN1
Salvia miltiorrhiza	Poriferasterol	SERPINA6
Salvia miltiorrhiza	Poriferasterol	VDR
Salvia miltiorrhiza	Poriferasterol	PPARA
Salvia miltiorrhiza	Poriferasterol	PTPN6
Salvia miltiorrhiza	Poriferasterol	NOS2
Salvia miltiorrhiza	Poriferasterol	PPARG
Salvia miltiorrhiza	Clionasterol	CYP2C19
Salvia miltiorrhiza	Clionasterol	PTPN1
Salvia miltiorrhiza	Clionasterol	SERPINA6
Salvia miltiorrhiza	Clionasterol	VDR
Salvia miltiorrhiza	Clionasterol	PPARA
Salvia miltiorrhiza	Clionasterol	PTPN6
Salvia miltiorrhiza	Clionasterol	NOS2
Salvia miltiorrhiza	Clionasterol	PPARG
Salvia miltiorrhiza	isoimperatorin	ALOX15
Salvia miltiorrhiza	isoimperatorin	CA1
Salvia miltiorrhiza	isoimperatorin	ATM
Salvia miltiorrhiza	Baicalin	AKR1B1
Salvia miltiorrhiza	Baicalin	TNF
Salvia miltiorrhiza	Baicalin	PTGS2
Salvia miltiorrhiza	Baicalin	ALDH2
Salvia miltiorrhiza	digallate	SERPINE1
Salvia miltiorrhiza	digallate	CA1
Salvia miltiorrhiza	luteolin	AKR1B1
Salvia miltiorrhiza	luteolin	GLO1
Salvia miltiorrhiza	luteolin	MMP9
Salvia miltiorrhiza	luteolin	MMP2
Salvia miltiorrhiza	luteolin	AKR1B10
Salvia miltiorrhiza	luteolin	ALOX15
Salvia miltiorrhiza	luteolin	PTGS2
Salvia miltiorrhiza	luteolin	CA1
Salvia miltiorrhiza	luteolin	AVPR2
Salvia miltiorrhiza	luteolin	IGF1R
Salvia miltiorrhiza	luteolin	F2
Salvia miltiorrhiza	luteolin	KDR
Salvia miltiorrhiza	luteolin	MMP3
Salvia miltiorrhiza	luteolin	AKR1A1
Salvia miltiorrhiza	luteolin	PLG
Salvia miltiorrhiza	przewalskin b	PTGS2
Salvia miltiorrhiza	przewalskin b	GSTM1
Salvia miltiorrhiza	przewalskin b	PRKCD
Salvia miltiorrhiza	przewalskin b	MAPK14
Salvia miltiorrhiza	przewalskin b	CASP3
Salvia miltiorrhiza	przewalskin b	PER2
Salvia miltiorrhiza	przewalskin b	IGF1R
Salvia miltiorrhiza	przewalskin b	INSR
Salvia miltiorrhiza	przewalskin b	C5AR1
Salvia miltiorrhiza	przewaquinone c	PTPN6
Salvia miltiorrhiza	przewaquinone c	AKR1B1
Salvia miltiorrhiza	przewaquinone c	FAAH
Salvia miltiorrhiza	przewaquinone c	MAPK14
Salvia miltiorrhiza	przewaquinone c	CA1
Salvia miltiorrhiza	przewaquinone c	CASP3
Salvia miltiorrhiza	przewaquinone c	CYP2C19
Salvia miltiorrhiza	przewaquinone c	KDR
Salvia miltiorrhiza	przewaquinone c	F2
Salvia miltiorrhiza	epidanshenspiroketallactone	KDR
Salvia miltiorrhiza	epidanshenspiroketallactone	PTGS2
Salvia miltiorrhiza	epidanshenspiroketallactone	ALOX15
Salvia miltiorrhiza	epidanshenspiroketallactone	FLT1
Salvia miltiorrhiza	epidanshenspiroketallactone	HIF1A
Salvia miltiorrhiza	epidanshenspiroketallactone	VDR
Salvia miltiorrhiza	epidanshenspiroketallactone	CNR1
Salvia miltiorrhiza	epidanshenspiroketallactone	NOS2
Salvia miltiorrhiza	Ferruginol	CNR1
Salvia miltiorrhiza	Ferruginol	KDR
Salvia miltiorrhiza	Ferruginol	IGF1R
Salvia miltiorrhiza	Ferruginol	PTGS2
Salvia miltiorrhiza	Ferruginol	ALOX15
Salvia miltiorrhiza	manool	CYP2C19
Salvia miltiorrhiza	manool	PTPN1
Salvia miltiorrhiza	manool	PER2
Salvia miltiorrhiza	manool	PRKCD
Salvia miltiorrhiza	manool	AKR1B10
Salvia miltiorrhiza	miltipolone	ALOX15
Salvia miltiorrhiza	salvianolic acid j	AKR1B1
Salvia miltiorrhiza	salvianolic acid j	PTGS2
Salvia miltiorrhiza	salvianolic acid j	MMP9
Salvia miltiorrhiza	salvianolic acid j	MMP2
Salvia miltiorrhiza	salvianolic acid j	MMP3
Salvia miltiorrhiza	salvianolic acid j	CNR1
Salvia miltiorrhiza	salvianolic acid g	AKR1B1
Salvia miltiorrhiza	salvianolic acid g	MMP9
Salvia miltiorrhiza	salvianolic acid g	MMP2
Salvia miltiorrhiza	salvianolic acid g	CASP3
Salvia miltiorrhiza	salvianolic acid g	ACE
Salvia miltiorrhiza	salvianolic acid g	MME
Salvia miltiorrhiza	salvianolic acid g	MMP3
Salvia miltiorrhiza	salvianolic acid g	SELL
Salvia miltiorrhiza	salvianolic acid g	SELE
Salvia miltiorrhiza	salvianolic acid g	SELP
Salvia miltiorrhiza	salviolone	EPHX2
Salvia miltiorrhiza	salviolone	ALOX15
Salvia miltiorrhiza	salviolone	AKR1B10
Salvia miltiorrhiza	sugiol	KDR
Salvia miltiorrhiza	sugiol	NOS2
Salvia miltiorrhiza	sugiol	ALOX15
Salvia miltiorrhiza	sugiol	CNR1
Salvia miltiorrhiza	sugiol	PTGS2
Salvia miltiorrhiza	Dehydrotanshinone II A	PTPN6
Salvia miltiorrhiza	Dehydrotanshinone II A	MAPK14
Salvia miltiorrhiza	Dehydrotanshinone II A	AKR1B1
Salvia miltiorrhiza	Dehydrotanshinone II A	KDR
Salvia miltiorrhiza	Dehydrotanshinone II A	IGF1R
Salvia miltiorrhiza	Dehydrotanshinone II A	BDKRB2
Salvia miltiorrhiza	2-isopropyl-8-methylphenanthrene-3,4-dione	PTPN1
Salvia miltiorrhiza	2-isopropyl-8-methylphenanthrene-3,4-dione	AKR1B1
Salvia miltiorrhiza	2-isopropyl-8-methylphenanthrene-3,4-dione	PTPN6
Salvia miltiorrhiza	2-isopropyl-8-methylphenanthrene-3,4-dione	KDR
Salvia miltiorrhiza	2-isopropyl-8-methylphenanthrene-3,4-dione	CASP3
Salvia miltiorrhiza	2-isopropyl-8-methylphenanthrene-3,4-dione	FLT1
Salvia miltiorrhiza	2-isopropyl-8-methylphenanthrene-3,4-dione	GCK
Salvia miltiorrhiza	2-isopropyl-8-methylphenanthrene-3,4-dione	ICAM1
Salvia miltiorrhiza	2-isopropyl-8-methylphenanthrene-3,4-dione	VCAM1
Salvia miltiorrhiza	2-isopropyl-8-methylphenanthrene-3,4-dione	SELE
Salvia miltiorrhiza	4-methylenemiltirone	PTPN6
Salvia miltiorrhiza	4-methylenemiltirone	AKR1B1
Salvia miltiorrhiza	formyltanshinone	PTPN6
Salvia miltiorrhiza	formyltanshinone	AKR1B1
Salvia miltiorrhiza	Methylenetanshinquinone	PTPN6
Salvia miltiorrhiza	Methylenetanshinquinone	AKR1B1
Salvia miltiorrhiza	Methylenetanshinquinone	MAPK14
Salvia miltiorrhiza	Methylenetanshinquinone	KDR
Salvia miltiorrhiza	przewaquinone c	PTPN6
Salvia miltiorrhiza	przewaquinone c	AKR1B1
Salvia miltiorrhiza	przewaquinone c	FAAH
Salvia miltiorrhiza	przewaquinone c	MAPK14
Salvia miltiorrhiza	przewaquinone c	CA1
Salvia miltiorrhiza	przewaquinone c	CASP3
Salvia miltiorrhiza	przewaquinone c	CYP2C19
Salvia miltiorrhiza	przewaquinone c	KDR
Salvia miltiorrhiza	przewaquinone c	F2
Salvia miltiorrhiza	sclareol	EPHX2
Salvia miltiorrhiza	sclareol	MMP3
Salvia miltiorrhiza	sclareol	MMP9
Salvia miltiorrhiza	sclareol	MAPK14
Salvia miltiorrhiza	sclareol	PRKCD
Salvia miltiorrhiza	sclareol	KDR
Salvia miltiorrhiza	sclareol	CA1
Salvia miltiorrhiza	sclareol	C5AR1
Salvia miltiorrhiza	sclareol	PER2
Salvia miltiorrhiza	sclareol	PTPN1
Salvia miltiorrhiza	sclareol	AVPR2
Salvia miltiorrhiza	sclareol	AGTR1
Salvia miltiorrhiza	tanshinaldehyde	AKR1B1
Salvia miltiorrhiza	tanshinaldehyde	PTPN6
Salvia miltiorrhiza	tanshinaldehyde	MMP2
Salvia miltiorrhiza	tanshinaldehyde	PTGS2
Salvia miltiorrhiza	tanshinaldehyde	EPHX2
Salvia miltiorrhiza	tanshinaldehyde	MMP14
Salvia miltiorrhiza	tanshinaldehyde	CASP3
Salvia miltiorrhiza	tanshinaldehyde	MMP9
Salvia miltiorrhiza	tanshinaldehyde	IGF1R
Salvia miltiorrhiza	tanshinaldehyde	NOS1
Salvia miltiorrhiza	tanshinaldehyde	NOS2
Salvia miltiorrhiza	tanshinaldehyde	ICAM1
Salvia miltiorrhiza	tanshinaldehyde	SELE
Salvia miltiorrhiza	tanshinaldehyde	MAPK14
Salvia miltiorrhiza	tanshinaldehyde	BDKRB1
Salvia miltiorrhiza	tanshinaldehyde	FAAH
Salvia miltiorrhiza	Danshenol B	AKR1B1
Salvia miltiorrhiza	Danshenol B	BDKRB1
Salvia miltiorrhiza	Danshenol B	PTPN6
Salvia miltiorrhiza	Danshenol B	CA1
Salvia miltiorrhiza	Danshenol B	MMP3
Salvia miltiorrhiza	Danshenol B	MMP9
Salvia miltiorrhiza	Danshenol B	CASP3
Salvia miltiorrhiza	Danshenol B	PER2
Salvia miltiorrhiza	Danshenol B	MAPK14
Salvia miltiorrhiza	Danshenol B	CNR1
Salvia miltiorrhiza	Danshenol B	F2
Salvia miltiorrhiza	Danshenol A	AKR1B1
Salvia miltiorrhiza	Danshenol A	PTPN6
Salvia miltiorrhiza	Danshenol A	BDKRB1
Salvia miltiorrhiza	Danshenol A	CASP3
Salvia miltiorrhiza	Danshenol A	MAPK14
Salvia miltiorrhiza	Danshenol A	KDR
Salvia miltiorrhiza	Salvilenone	PTGS2
Salvia miltiorrhiza	Salvilenone	EPHX2
Salvia miltiorrhiza	cryptotanshinone	AKR1B1
Salvia miltiorrhiza	cryptotanshinone	PTPN6
Salvia miltiorrhiza	cryptotanshinone	EPHX2
Salvia miltiorrhiza	cryptotanshinone	KDR
Salvia miltiorrhiza	cryptotanshinone	PTPN1
Salvia miltiorrhiza	cryptotanshinone	ICAM1
Salvia miltiorrhiza	cryptotanshinone	SELE
Salvia miltiorrhiza	cryptotanshinone	PTGS2
Salvia miltiorrhiza	danshenspiroketallactone	VDR
Salvia miltiorrhiza	danshenspiroketallactone	PTGS2
Salvia miltiorrhiza	deoxyneocryptotanshinone	PTPN1
Salvia miltiorrhiza	deoxyneocryptotanshinone	AKR1B1
Salvia miltiorrhiza	deoxyneocryptotanshinone	PPARG
Salvia miltiorrhiza	deoxyneocryptotanshinone	PTPN6
Salvia miltiorrhiza	dihydrotanshinoneⅠ	AKR1B1
Salvia miltiorrhiza	dihydrotanshinoneⅠ	PTPN6
Salvia miltiorrhiza	dihydrotanshinoneⅠ	KDR
Salvia miltiorrhiza	dihydrotanshinoneⅠ	ALOX15
Salvia miltiorrhiza	dihydrotanshinoneⅠ	CASP3
Salvia miltiorrhiza	dihydrotanshinoneⅠ	GCK
Salvia miltiorrhiza	dihydrotanshinoneⅠ	PTPN1
Salvia miltiorrhiza	dihydrotanshinoneⅠ	ALDH2
Salvia miltiorrhiza	Isotanshinone II	PTPN6
Salvia miltiorrhiza	Isotanshinone II	AKR1B1
Salvia miltiorrhiza	Isotanshinone II	KDR
Salvia miltiorrhiza	Isotanshinone II	CA1
Salvia miltiorrhiza	microstegiol	PER2
Salvia miltiorrhiza	microstegiol	IGF1R
Salvia miltiorrhiza	Miltirone	PTPN1
Salvia miltiorrhiza	Miltirone	AKR1B1
Salvia miltiorrhiza	neocryptotanshinone ii	PTPN1
Salvia miltiorrhiza	neocryptotanshinone ii	AKR1B1
Salvia miltiorrhiza	neocryptotanshinone ii	PPARG
Salvia miltiorrhiza	neocryptotanshinone ii	PTPN6
Salvia miltiorrhiza	neocryptotanshinone	AKR1B1
Salvia miltiorrhiza	neocryptotanshinone	PTPN1
Salvia miltiorrhiza	neocryptotanshinone	HCAR2
Salvia miltiorrhiza	neocryptotanshinone	PPARG
Salvia miltiorrhiza	neocryptotanshinone	PPARA
Salvia miltiorrhiza	neocryptotanshinone	PTPN6
Salvia miltiorrhiza	neocryptotanshinone	MME
Salvia miltiorrhiza	neocryptotanshinone	MMP9
Salvia miltiorrhiza	neocryptotanshinone	AGTR1
Salvia miltiorrhiza	NSC 122421	KDR
Salvia miltiorrhiza	NSC 122421	NOS2
Salvia miltiorrhiza	NSC 122421	ALOX15
Salvia miltiorrhiza	NSC 122421	CNR1
Salvia miltiorrhiza	NSC 122421	PTGS2
Salvia miltiorrhiza	tanshinone iia	AKR1B1
Salvia miltiorrhiza	tanshinone iia	PTPN6
Salvia miltiorrhiza	tanshinone iia	FAAH
Salvia miltiorrhiza	tanshinone Ⅵ	AKR1B1
Salvia miltiorrhiza	tanshinone Ⅵ	PTPN6
Salvia miltiorrhiza	tanshinone Ⅵ	HCAR2
Salvia miltiorrhiza	tanshinone Ⅵ	PPARG
Salvia miltiorrhiza	tanshinone Ⅵ	PPARA
Salvia miltiorrhiza	Succinic Acid	HBB
Salvia miltiorrhiza	Succinic Acid	SDHB
Salvia miltiorrhiza	Paramiltioic Acid	ALB
Salvia miltiorrhiza	Paramiltioic Acid	SERPINA6
Salvia miltiorrhiza	Ferruginol	SOD1
Salvia miltiorrhiza	Sugiol	SOD1
Salvia miltiorrhiza	Sugiol	ALB
Salvia miltiorrhiza	Danshenol B	SERPINA6
Salvia miltiorrhiza	2-Isopropyl-8-Methylphenanthrene-3,4-Dione(R0-090680)	F2
Salvia miltiorrhiza	2-Isopropyl-8-Methylphenanthrene-3,4-Dione(R0-090680)	MTHFR
Salvia miltiorrhiza	Miltionone Ii	SERPINA6
Salvia miltiorrhiza	Miltipolone	SOD1
Salvia miltiorrhiza	Salviol	SOD1
Salvia miltiorrhiza	Salviol	ALB
Salvia miltiorrhiza	Salviol	CYP2C19
Codonopsis pilosula	Spinoside A	F2
Codonopsis pilosula	Spinoside A	REN
Codonopsis pilosula	Stigmasterone	CTSD
Codonopsis pilosula	Stigmasterone	SERPINA6
Codonopsis pilosula	Stigmasterone	FAAH
Codonopsis pilosula	Stigmasterone	PTPN1
Codonopsis pilosula	Stigmasterone	PTPN6
Codonopsis pilosula	Chondrillasterol	CYP2C19
Codonopsis pilosula	Chondrillasterol	PTPN1
Codonopsis pilosula	Chondrillasterol	SERPINA6
Codonopsis pilosula	Chondrillasterol	PTPN6
Codonopsis pilosula	Chondrillasterol	VDR
Codonopsis pilosula	Chondrillasterol	PPARG
Codonopsis pilosula	Chondrillasterol	PPARA
Codonopsis pilosula	Chondrillasterol	CNR1
Codonopsis pilosula	Chondrillasterol	MAPK3
Codonopsis pilosula	Chondrillasterol	AKR1B10
Codonopsis pilosula	Diop	PRKCD
Codonopsis pilosula	Diop	PTPN1
Codonopsis pilosula	Stigmasterol	CYP2C19
Codonopsis pilosula	Stigmasterol	PTPN1
Codonopsis pilosula	Stigmasterol	SERPINA6
Codonopsis pilosula	Stigmasterol	VDR
Codonopsis pilosula	Stigmasterol	PPARA
Codonopsis pilosula	Stigmasterol	PTPN6
Codonopsis pilosula	Stigmasterol	NOS2
Codonopsis pilosula	Stigmasterol	PPARG
Codonopsis pilosula	Spinasterol	CYP2C19
Codonopsis pilosula	Spinasterol	PTPN1
Codonopsis pilosula	Spinasterol	SERPINA6
Codonopsis pilosula	Spinasterol	PTPN6
Codonopsis pilosula	Spinasterol	VDR
Codonopsis pilosula	Spinasterol	PPARG
Codonopsis pilosula	Spinasterol	PPARA
Codonopsis pilosula	Spinasterol	CNR1
Codonopsis pilosula	Spinasterol	MAPK3
Codonopsis pilosula	Spinasterol	AKR1B10
Codonopsis pilosula	luteolin	AKR1B1
Codonopsis pilosula	luteolin	GLO1
Codonopsis pilosula	luteolin	MMP9
Codonopsis pilosula	luteolin	MMP2
Codonopsis pilosula	luteolin	AKR1B10
Codonopsis pilosula	luteolin	ALOX15
Codonopsis pilosula	luteolin	PTGS2
Codonopsis pilosula	luteolin	CA1
Codonopsis pilosula	luteolin	AVPR2
Codonopsis pilosula	luteolin	IGF1R
Codonopsis pilosula	luteolin	F2
Codonopsis pilosula	luteolin	KDR
Codonopsis pilosula	luteolin	MMP3
Codonopsis pilosula	luteolin	AKR1A1
Codonopsis pilosula	luteolin	PLG
Codonopsis pilosula	Taraxerol	PTPN1
Codonopsis pilosula	Taraxerol	CYP2C19
Codonopsis pilosula	Taraxerol	PTPN6
Codonopsis pilosula	Taraxerol	FAAH
Codonopsis pilosula	Taraxerol	PPARG
Codonopsis pilosula	Taraxerol	PPARA
Codonopsis pilosula	Taraxerol	SERPINA6
Codonopsis pilosula	Taraxerol	AKR1B10
Codonopsis pilosula	Taraxerol	NOS2
Codonopsis pilosula	Taraxerol	MAPK3
Codonopsis pilosula	Taraxerol	CNR1
Codonopsis pilosula	Schottenol	PTPN1
Codonopsis pilosula	Schottenol	CYP2C19
Codonopsis pilosula	Schottenol	PTPN6
Codonopsis pilosula	Schottenol	NOS2
Codonopsis pilosula	Schottenol	VDR
Codonopsis pilosula	Schottenol	SERPINA6
Codonopsis pilosula	Schottenol	MAPK3
Codonopsis pilosula	Schottenol	AKR1B10
Codonopsis pilosula	Schottenol	CNR1
Codonopsis pilosula	methyl icosa-11,14-dienoate	CNR1
Codonopsis pilosula	methyl icosa-11,14-dienoate	PPARA
Codonopsis pilosula	methyl icosa-11,14-dienoate	PPARG
Codonopsis pilosula	methyl icosa-11,14-dienoate	FAAH
Codonopsis pilosula	methyl icosa-11,14-dienoate	PTGS2
Codonopsis pilosula	methyl icosa-11,14-dienoate	PTPN1
Codonopsis pilosula	methyl icosa-11,14-dienoate	RAF1
Codonopsis pilosula	methyl icosa-11,14-dienoate	GCK
Codonopsis pilosula	methyl icosa-11,14-dienoate	KDR
Codonopsis pilosula	methyl icosa-11,14-dienoate	NOS2
Codonopsis pilosula	methyl icosa-11,14-dienoate	C5AR1
Codonopsis pilosula	methyl icosa-11,14-dienoate	INSR
Codonopsis pilosula	5alpha-Stigmastane-3,6-dione	CA1
Codonopsis pilosula	5alpha-Stigmastane-3,6-dione	CTSD
Codonopsis pilosula	5alpha-Stigmastane-3,6-dione	AVPR2
Codonopsis pilosula	5alpha-Stigmastane-3,6-dione	PTGS2
Codonopsis pilosula	5alpha-Stigmastane-3,6-dione	CNR1
Codonopsis pilosula	5alpha-Stigmastane-3,6-dione	EPHX2
Codonopsis pilosula	5alpha-Stigmastane-3,6-dione	SERPINA6
Codonopsis pilosula	5alpha-Stigmastane-3,6-dione	NOS2
Codonopsis pilosula	5alpha-Stigmastane-3,6-dione	CYP2C19
Codonopsis pilosula	Perlolyrine	CA1
Codonopsis pilosula	Perlolyrine	ALDH2
Codonopsis pilosula	Perlolyrine	FLT1
Codonopsis pilosula	Perlolyrine	PON1
Codonopsis pilosula	Perlolyrine	PPARG
Codonopsis pilosula	Perlolyrine	KDM1A
Codonopsis pilosula	Frutinone A	NFKB1
Codonopsis pilosula	Frutinone A	CA1
Codonopsis pilosula	glycitein	ALDH2
Codonopsis pilosula	glycitein	ALOX15
Codonopsis pilosula	glycitein	PON1
Codonopsis pilosula	glycitein	CA1
Codonopsis pilosula	glycitein	PPARA
Codonopsis pilosula	glycitein	AKR1B1
Codonopsis pilosula	11-Hydroxyrankinidine	ADRB3
Codonopsis pilosula	11-Hydroxyrankinidine	F2
Codonopsis pilosula	11-Hydroxyrankinidine	TLR4
Codonopsis pilosula	11-Hydroxyrankinidine	REN
Codonopsis pilosula	11-Hydroxyrankinidine	CTSD
Codonopsis pilosula	11-Hydroxyrankinidine	MAPK14
Codonopsis pilosula	11-Hydroxyrankinidine	NOS1
Codonopsis pilosula	11-Hydroxyrankinidine	PTPN1
Codonopsis pilosula	11-Hydroxyrankinidine	KDR
Codonopsis pilosula	Lauric Acid	ALB
Codonopsis pilosula	Lauric Acid	CYP2C19
Codonopsis pilosula	Lauric Acid	PPARG
Codonopsis pilosula	Lauric Acid	PPARA
Codonopsis pilosula	Lauric Acid	CNR1
Codonopsis pilosula	Lauric Acid	PTGS2
Codonopsis pilosula	Lauric Acid	TLR4
Codonopsis pilosula	Lauric Acid	INS
Codonopsis pilosula	Lauric Acid	RHO
Codonopsis pilosula	Lauric Acid	RCVRN
Codonopsis pilosula	Caprylic Acid	ALB
Codonopsis pilosula	Caprylic Acid	CYP2C19
Codonopsis pilosula	Caprylic Acid	PPARG
Codonopsis pilosula	Caprylic Acid	PPARA
Codonopsis pilosula	Caprylic Acid	CNR1
Codonopsis pilosula	Caprylic Acid	PTGS2
Codonopsis pilosula	Caprylic Acid	TLR4
Codonopsis pilosula	Caprylic Acid	INS
Codonopsis pilosula	Caprylic Acid	RHO
Codonopsis pilosula	Caprylic Acid	RCVRN
Codonopsis pilosula	Atractylenolide III	PPARA
Codonopsis pilosula	Atractylenolide III	ALB
Codonopsis pilosula	Atractylenolide III	CYP2C19
Codonopsis pilosula	Caproic Acid	ALB
Codonopsis pilosula	Caproic Acid	PTGS2
Codonopsis pilosula	Caproic Acid	PPARG
Codonopsis pilosula	Caproic Acid	PPARA
Codonopsis pilosula	Caproic Acid	TLR4
Codonopsis pilosula	Caproic Acid	INS
Codonopsis pilosula	Caproic Acid	RHO
Codonopsis pilosula	Caproic Acid	RCVRN
Codonopsis pilosula	Enanthic Acid	ALB
Codonopsis pilosula	Enanthic Acid	CYP2C19
Codonopsis pilosula	Enanthic Acid	PPARG
Codonopsis pilosula	Enanthic Acid	PPARA
Codonopsis pilosula	Enanthic Acid	CNR1
Codonopsis pilosula	Enanthic Acid	PTGS2
Codonopsis pilosula	Enanthic Acid	TLR4
Codonopsis pilosula	Enanthic Acid	INS
Codonopsis pilosula	Enanthic Acid	RHO
Codonopsis pilosula	Enanthic Acid	RCVRN
Codonopsis pilosula	Nonanoic Acid	ALB
Codonopsis pilosula	Nonanoic Acid	CYP2C19
Codonopsis pilosula	Nonanoic Acid	PPARG
Codonopsis pilosula	Nonanoic Acid	PPARA
Codonopsis pilosula	Nonanoic Acid	CNR1
Codonopsis pilosula	Nonanoic Acid	PTGS2
Codonopsis pilosula	Nonanoic Acid	TLR4
Codonopsis pilosula	Nonanoic Acid	INS
Codonopsis pilosula	Nonanoic Acid	RHO
Codonopsis pilosula	Nonanoic Acid	RCVRN
Codonopsis pilosula	Niacin	HCAR2
Codonopsis pilosula	Azelaic Acid	SDHB
Codonopsis pilosula	Azelaic Acid	HBB
Codonopsis pilosula	N-Hexyl-Β-D-Glucopyranoside	RHO
Codonopsis pilosula	N-Hexyl-Β-D-Glucopyranoside	SDHB
Codonopsis pilosula	(X{2212})-Nicotine	CYP2C19
Codonopsis pilosula	Syringaldehyde	GLO1

## Sheet: Table S5
Table S5 Pathways' corresponding target predicted by KEGG database
pathway	Target
AGE-RAGE signaling pathway	SELE
	MMP2
	ICAM1
	MAPK3
	SERPINE1
	NFKB1
	MAPK14
	IL6
	AGTR1
	VCAM1
	PRKCD
	CASP3
	NOS3
	HRAS
	TNF
	HRAS
TNF signaling pathway	SELE
	PTGS2
	ICAM1
	MMP9
	MAPK3
	NFKB1
	MAPK14
	IL6
	MMP3
	MMP14
	VCAM1
	CASP3
	TNF
IL-17 signaling pathway	PTGS2
	MMP9
	MAPK3
	NFKB1
	MAPK14
	IL6
	MMP3
	CASP3
	TNF
Sphingolipid signaling pathway	MAPK3
	NFKB1
	MAPK14
	CTSD
	RAF1
	NOS3
	BDKRB2
	HRAS
	TNF
	HRAS
MAPK signaling pathway	FLT4
	FLT1
	MAPK3
	NFKB1
	MAPK14
	KDR
	RAF1
	IGF1R
	CASP3
	INSR
	HRAS
	TNF
	INS
	HRAS
NF-kappa B signaling pathway	PTGS2
	ICAM1
	NFKB1
	TLR4
	ATM
	VCAM1
	TNF
mTOR signaling pathway	MAPK3
	RAF1
	IGF1R
	INSR
	HRAS
	TNF
	INS
	HRAS
Adipocytokine signaling pathway	NFKB1
	SLC2A1
	PPARA
	TNF
NOD-like receptor signaling pathway	MAPK3
	NFKB1
	MAPK14
	IL6
	TLR4
	PRKCD
	TNF
TGF-beta signaling pathway	EP300
	MAPK3
	TNF
FoxO signaling pathway	EP300
	MAPK3
	MAPK14
	RAF1
	IL6
	IGF1R
	ATM
	INSR
	HRAS
	INS
	HRAS
VEGF signaling pathway	PTGS2
	MAPK3
	MAPK14
	KDR
	RAF1
	NOS3
	HRAS
	HRAS
Rap1 signaling pathway	FLT4
	FLT1
	MAPK3
	MAPK14
	CNR1
	KDR
	RAF1
	IGF1R
	INSR
	HRAS
	INS
	HRAS
PI3K-Akt signaling pathway	FLT4
	FLT1
	MAPK3
	NFKB1
	ITGA4
	KDR
	RAF1
	IL6
	TLR4
	IGF1R
	NOS3
	INSR
	HRAS
	INS
	HRAS
